# Supplementary material
Source: ML conference proceedings conference paper supplement (https://openreview.net/forum?id=iuTyzHnvP4)
Supplement: supplementary_material [file attachment]

# BCE VS. CE IN DEEP FEATURE LEARNING

**Anonymous authors**

Paper under double-blind review

## ABSTRACT

When training classification models, it expects that the leaned features are compact within classes, and can well separate different classes. As a dominant loss function to train classification models, the minimization of CE (Cross-entropy) loss can maximize the compactness and distinctiveness, i.e., reaching neural collapse. The recently published works show that BCE (Binary CE) loss performs also well in multi-class tasks. In this paper, we compare BCE and CE in the context of deep feature learning. For the first time, we prove that BCE can also maximize the intra-class compactness and inter-class distinctiveness when reaching its minimum, i.e., leading to neural collapse. We point out that CE measures the relative values of decision scores in the model training, implicitly enhancing the feature properties by classifying samples one-by-one. In contrast, BCE measures the absolute values of decision scores and adjust the positive/negative decision scores across all samples to uniform high/low levels. Meanwhile, the classifier bias in BCE presents a substantial constraint on the samples' decision scores. Thereby, BCE explicitly enhances the feature properties in the training. The experimental results are aligned with above analysis, and show that BCE consistently and significantly improve the classification performance and leads to better compactness and distinctiveness among sample features.

## 1 INTRODUCTION

Cross-entropy (CE) loss is the most commonly used loss function for classifications and feature learning. In a multi-class classification with  $K$  categories, for any sample  $\mathbf{X}^{(k)}$  from category  $k$ , a model  $\mathcal{M}$  first extracts its feature  $\mathbf{h}^{(k)} = \mathcal{M}(\mathbf{X}^{(k)}) \in \mathbb{R}^d$ , which is output from the penultimate hidden layer in deep model. Then a linear classifier with weight  $\mathbf{W} = [\mathbf{w}_1, \dots, \mathbf{w}_K]^T \in \mathbb{R}^{K \times d}$  and bias  $\mathbf{b} = [b_1, \dots, b_K]^T \in \mathbb{R}^K$  transforms the feature into  $K$  logits/decision scores,  $\{\mathbf{w}_j^T \mathbf{h}^{(k)} - b_j\}_{j=1}^K$ , which are finally converted into predicted probabilities by Softmax, and computed the loss using cross-entropy,

$$\mathcal{L}_{ce}(\mathbf{z}^{(k)}) = -\mathbf{y}_k^T \cdot \log \left( \text{Softmax}(\mathbf{z}^{(k)}) \right) = \log \left( 1 + \sum_{\substack{\ell=1 \\ \ell \neq k}}^K \frac{e^{\mathbf{w}_\ell^T \mathbf{h}^{(k)} - b_\ell}}{e^{\mathbf{w}_k^T \mathbf{h}^{(k)} - b_k}} \right), \quad (1)$$

where  $\mathbf{z}^{(k)} = \mathbf{W}\mathbf{h}^{(k)} - \mathbf{b}$  and  $\mathbf{y}_k$  is the one-hot label, i.e., the vector with one only in the  $k$ th entry.

In the multi-class classification, binary CE (BCE) loss is deduced by decomposing the task into  $K$  binary tasks and predicting whether the sample  $\mathbf{X}^{(k)}$  belongs to the  $j$ th category, for  $\forall j \in [K]$ ,

$$\begin{aligned} \mathcal{L}_{bce}(\mathbf{z}^{(k)}) &= -\mathbf{y}_k^T \cdot \log \left( \text{Sigmoid}(\mathbf{z}^{(k)}) \right) - (\mathbf{1} - \mathbf{y}_k)^T \cdot \log \left( \mathbf{1} - \text{Sigmoid}(\mathbf{z}^{(k)}) \right) \\ &= \log \left( 1 + e^{-\mathbf{w}_k^T \mathbf{h}^{(k)} + b_k} \right) + \sum_{\substack{j=1 \\ j \neq k}}^K \log \left( 1 + e^{\mathbf{w}_j^T \mathbf{h}^{(k)} - b_j} \right), \end{aligned} \quad (2)$$

which has been widely used in the multi-label classification (Kobayashi, 2023) and attracted increasing attentions in the multi-class classification (Beyer et al., 2020; Wightman et al., 2021; Touvron et al., 2022; Fang et al., 2023; Wen et al., 2022; Zhou et al., 2023).

The pre-trained classification models can be used as feature extractors for downstream tasks that request well intra-class compactness and inter-class distinctiveness across the sample features, such

054 as person re-identification (He et al., 2021), object tracking (Cai et al., 2023), image segmentation  
 055 (Guo et al., 2022), and facial recognition (Wen et al., 2022), etc. For CE, a remarkable theoretical  
 056 result is that when it reaches its minimum, both the compactness and distinctiveness on the training  
 057 samples will be maximized, which refers to neural collapse found by Pappayan et al. (2020). Neural  
 058 collapse gives peace of mind in training classification models by using CE, and it was extended to  
 059 the losses satisfying contrastive property by Zhu et al. (2021) and Zhou et al. (2022), including CE,  
 060 focal loss, and label smoothing loss. However, though BCE in Eq. (2) is a combination of multiple  
 061 CE, it does not satisfy the contrastive property due to its classifier bias, and whether BCE can lead  
 062 to neural collapse, or not, is not answered.

063 Besides that, in the practical training of classification models, the classifier vectors  $\{\mathbf{w}_k\}_{k=1}^K$  play  
 064 the role of proxy for each category (Wen et al., 2022). Intuitively, when the distances between  
 065 the sample features and their class proxy are closer, or the *positive* decision scores between them  
 066 are larger, it usually leads to better intra-class compactness. Similarly, when the distances between  
 067 sample features and the proxy of different classes are farther, or the *negative* decision scores between  
 068 them are smaller, it could result in better inter-class distinctiveness. However, according to Eq. (1),  
 069 CE measures the *relative* value between the exponential positive and negative decision scores using  
 070 Softmax and logarithmic functions, to pursue that the positive decision score is greater than all its  
 071 negative ones for each sample, making it unable to explicitly and directly enhance the intra-class  
 072 compactness and inter-class distinctiveness across samples. In contrast, BCE in Eq. (2) respectively  
 073 measures the *absolute* values of the exponential positive decision score and the exponential negative  
 074 ones using Sigmoid and logarithmic functions, which makes it could explicitly and directly enhance  
 075 the compactness and distinctiveness of features in the training.

076 In this paper, we compare BCE and CE in deep feature learning. We primarily address two questions:  
 077 **Q1.** Can BCE result in the neural collapse, i.e., maximizing the compactness and distinctiveness in  
 078 theoretical? **Q2.** In practical training of classification models, does BCE perform better than CE in  
 079 terms of the feature compactness and distinctiveness? Our contributions are summarized as follows.

- 080 (1) We provide the first theoretical proof that BCE can also lead to the neural collapse, i.e.,  
 081 maximizing the compactness and distinctiveness, even when the loss does not satisfy the  
 082 contrastive property, broadening the range of losses that can lead to neural collapse.
- 083 (2) We find that BCE performs better than CE in enhancement of intra-class compactness and  
 084 inter-class distinctiveness across sample features, and, BCE can explicitly enhance the fea-  
 085 ture properties, while CE only implicitly enhance them.
- 086 (3) We point out that when training models with BCE, the classifier bias plays a substantial role  
 087 in enhancing the feature properties, while in the training with CE, it almost does not work.
- 088 (4) We conduct extensive experiments, and find that, compared to CE, BCE can more quickly  
 089 lead to the neural collapse on the training dataset and achieves better feature compactness  
 090 and distinctiveness, resulting in higher classification performance on the test dataset.

## 091 2 RELATED WORKS

### 092 2.1 CE vs. BCE

093 The CE loss is the most popular loss used in the multi-class classification and feature learning, which  
 094 has been evolved into many variants in different scenarios, such as focal loss (Lin et al., 2017), label  
 095 smoothing loss (Szegedy et al., 2016), normalized Softmax loss (Wang et al., 2017), and marginal  
 096 Softmax loss (Liu et al., 2016), etc. The classification models are often applied to the downstream  
 097 tasks, such as image segmentation (Guo et al., 2022), person re-identification (He et al., 2021),  
 098 object tracking (Cai et al., 2023), etc., which request well intra-class compactness and inter-class  
 099 distinctiveness among the sample features. In the multi-class classification task, the BCE loss can  
 100 be deduced by decomposing the task into  $K$  binary tasks and adding the  $K$  binary cross-entropy  
 101 losses, which has been widely applied in the multi-label classification (Kobayashi, 2023).

102 The CE and BCE losses are expected to train the models to fit the sample distribution in the multi-  
 103 class and multi-label classifications. When Wightman et al. (2021) applied BCE to the training of  
 104 ResNets for a multi-class task, they considered that this loss is consistent with Mixup (Zhang et al.,  
 105 2018) and CutMix (Yun et al., 2019) augmentations, which mix multiple objects from different  
 106 samples into one sample. DeiT III (Touvron et al., 2022) adopted this approach and achieved a  
 107

significant improvement in the multi-class task on ImageNet-1K by using the BCE loss. Currently, though the CE loss dominates the training of multi-class and feature learning models, the BCE loss is also gaining more attention and is increasingly being applied in these fields (Fang et al., 2023; Wang et al., 2023; Xu et al., 2023; Mehta & Rastegari, 2023; Chun, 2024; Hao et al., 2024). However, none of these works reveals the essential advantages of BCE over CE.

## 2.2 NEURAL COLLAPSE

The neural collapse was first found by Papayan et al. (2020), which refers to four properties about the sample features  $\{\mathbf{h}_i^{(k)}\}$  and the classifier vectors  $\{\mathbf{w}_k\}$  at the terminal phase of training.

- **NC1**, within-class variability collapse. Each feature  $\mathbf{h}_i^{(k)}$  collapse to its class center  $\bar{\mathbf{h}}^{(k)} = \frac{1}{n_k} \sum_{i'=1}^{n_k} \mathbf{h}_{i'}^{(k)}$ , indicating the *maximal intra-class compactness*
- **NC2**, convergence to simplex equiangular tight frame. The set of class centers  $\{\bar{\mathbf{h}}^{(k)}\}_{k=1}^K$  form a simplex equiangular tight frame (ETF), with equal and maximized cosine distance between every pair of feature means, i.e., the *maximal inter-class distinctiveness*.
- **NC3**, convergence to self-duality. The class center  $\bar{\mathbf{h}}^{(k)}$  is ideally aligned with the classifier vector  $\mathbf{w}_k, \forall k \in [K]$ .
- **NC4**, simplification to nearest class center. The classifier is equivalent to a nearest class center decision.

The current works about neural collapse (Kothapalli, 2023) are focused on the CE loss (Lu & Steinerberger, 2022; Graf et al., 2021; Zhu et al., 2021) and mean squared error (MSE) loss (Han et al., 2022; Tիրer & Bruna, 2022). It has been proved that the models will fall to the neural collapse when the loss reaches its minimum. A comprehensive analysis (Zhou et al., 2022) for various losses, including CE loss, focal loss (Lin et al., 2017), and label smoothing loss (Szegedy et al., 2016), shows that these losses perform equally as any global minimum point of the loss satisfies the neural collapse. The neural collapse has also been investigated in the imbalanced datasets (Fang et al., 2021; Yang et al., 2022; Wang et al., 2024), out-of-distribution data (Ammar et al., 2024), and models with fixed classifiers (Yang et al., 2022; Kim & Kim, 2024). All these studies are conducted using CE or MSE losses; and whether BCE can lead to neural collapse remains unexplored.

## 3 MAIN RESULTS

In this section, we first theoretically prove that BCE can maximize the compactness and distinctiveness when reaching its minimums (**Q1**). Then, through in-depth analyzing the decision scores in the training with BCE and CE, we explain that BCE can better enhance the compactness and distinctiveness of sample features in practical training (**Q2**).

### 3.1 PRELIMINARY

Let  $\mathcal{D} = \bigcup_{k=1}^K \bigcup_{i=1}^{n_k} \{\mathbf{X}_i^{(k)}\}$  be a sample set, where  $\mathbf{X}_i^{(k)}$  denotes the  $i$ th sample of category  $k$ ,  $n_k$  is the number of samples in this category, and  $\mathbf{h}_i^{(k)} = \mathcal{M}(\mathbf{X}_i^{(k)})$ . In classification tasks, a linear classifier with vectors  $\mathbf{W} = [\mathbf{w}_1, \dots, \mathbf{w}_K]^T \in \mathbb{R}^{K \times d}$  and bias  $\mathbf{b} = [b_1, \dots, b_K]^T \in \mathbb{R}^K$  predicts the category for each sample according to its feature. For the well prediction results, the CE or BCE loss is applied to tune the parameters of the model  $\mathcal{M}$  and classifier.

Following the previous works (Fang et al., 2021; Lu & Steinerberger, 2022; Graf et al., 2021; Zhu et al., 2021; Han et al., 2022; Tիրer & Bruna, 2022) for neural collapse, we compare CE and BCE in training of unconstrained model or layer-peeled model in this paper, i.e, treating the features  $\bigcup_{k=1}^K \{\mathbf{h}_i^{(k)}\}_{i=1}^{n_k}$ , classifier vectors  $\{\mathbf{w}_k\}_{k=1}^K$ , and classifier bias  $\{b_k\}_{k=1}^K$  as free variables, without considering the sophisticated structure or the parameters of the model  $\mathcal{M}$ . Then, taking the regularization terms on the variables, the CE or BCE loss in the training is

$$f_\mu(\mathbf{W}, \mathbf{H}, \mathbf{b}) := \frac{1}{nK} \sum_{k=1}^K \sum_{i=1}^{n_k} \mathcal{L}_\mu(\mathbf{W}\mathbf{h}_i^{(k)} - \mathbf{b}) + \frac{\lambda_{\mathbf{W}}}{2} \|\mathbf{W}\|_F^2 + \frac{\lambda_{\mathbf{H}}}{2} \|\mathbf{H}\|_F^2 + \frac{\lambda_{\mathbf{b}}}{2} \|\mathbf{b}\|_2^2, \quad (3)$$

where  $\mathcal{L}_\mu$  is presented in Eqs. (1-2),  $\mu \in \{\text{ce}, \text{bce}\}$ ,

$$\mathbf{W} = [\mathbf{w}_1, \mathbf{w}_2, \dots, \mathbf{w}_K]^T \in \mathbb{R}^{K \times d}, \quad (4)$$

$$\mathbf{H} = [\mathbf{h}_1^{(1)}, \mathbf{h}_2^{(1)}, \dots, \mathbf{h}_{n_1}^{(1)}, \dots, \mathbf{h}_1^{(K)}, \mathbf{h}_2^{(K)}, \dots, \mathbf{h}_{n_K}^{(K)}] \in \mathbb{R}^{d \times (\sum_{k=1}^K n_k)}, \quad (5)$$

$$\mathbf{b} = [b_1, b_2, \dots, b_K]^T \in \mathbb{R}^K, \quad (6)$$

and  $\lambda_{\mathbf{W}}, \lambda_{\mathbf{H}} > 0, \lambda_{\mathbf{b}} \geq 0$  are weight decay parameters for the regularization terms.

### 3.2 NEURAL COLLAPSE WITH CE AND BCE LOSSES

On the balanced dataset, i.e.,  $n = n_k, \forall k \in [K]$ , Zhu et al. (2021) proved that the CE loss can result in neural collapse, and in Theorem 1, Zhou et al. (2022) extended the proof to the losses satisfying the contrastive property (see Definition S-1 in supplementary), such as focal loss and label smoothing loss. Though BCE loss is a combination of CE loss, it fails to satisfy the contrastive property, as that the classifier bias parameters present substantial constraint within its components. Despite that, we find that the BCE loss can also result in the neural collapse, i.e., Theorem 2. The primary difference between BCE and CE losses lies in the bias parameter  $\mathbf{b}$  of their classifiers.

**Theorem 1** (Zhou et al., 2022) *Assume that the feature dimension  $d$  is larger than the category number  $K$ , i.e.,  $d \geq K - 1$ , and  $\mathcal{L}_\mu$  is satisfying the contrastive property. Then any global minimizer  $(\mathbf{W}^*, \mathbf{H}^*, \mathbf{b}^*)$  of  $f_\mu(\mathbf{W}, \mathbf{H}, \mathbf{b})$  defined using  $\mathcal{L}_\mu$  with Eq. (3) obeys the following properties,*

$$\|\mathbf{w}^*\| = \|\mathbf{w}_1^*\| = \|\mathbf{w}_2^*\| = \dots = \|\mathbf{w}_K^*\|, \quad (7)$$

$$\mathbf{h}_i^{(k)*} = \sqrt{\frac{\lambda_{\mathbf{W}}}{n\lambda_{\mathbf{H}}}} \mathbf{w}_k^*, \quad \forall k \in [K], i \in [n], \quad (8)$$

$$\tilde{\mathbf{h}}_i^* := \frac{1}{K} \sum_{k=1}^K \mathbf{h}_i^{(k)*} = \mathbf{0}, \quad \forall i \in [n], \quad (9)$$

$$\mathbf{b}^* = b^* \mathbf{1}_K, \quad (10)$$

where either  $b^* = 0$  or  $\lambda_{\mathbf{b}} = 0$ . The matrix  $\mathbf{W}^{*T}$  forms a  $K$ -simplex ETF in the sense that

$$\frac{1}{\|\mathbf{w}^*\|_2^2} \mathbf{W}^{*T} \mathbf{W}^* = \frac{K}{K-1} \left( \mathbf{I}_K - \frac{1}{K} \mathbf{1}_K \mathbf{1}_K^T \right), \quad (11)$$

where  $\mathbf{I}_K \in \mathbb{R}^{K \times K}$  denotes the identity matrix, and  $\mathbf{1}_K \in \mathbb{R}^K$  denotes the all ones vector. ■

**Theorem 2** *Assume that the feature dimension  $d$  is larger than the category number  $K$ , i.e.,  $d \geq K - 1$ . Then any global minimizer  $(\mathbf{W}^*, \mathbf{H}^*, \mathbf{b}^*)$  of  $f_{\text{bce}}(\mathbf{W}, \mathbf{H}, \mathbf{b})$  defined using  $\mathcal{L}_{\text{bce}}$  with Eq. (3) obeys the properties (7) - (11), where  $b^*$  is the solution of equation*

$$0 = - \frac{K-1}{K \left( 1 + \exp \left( b + \sqrt{\frac{\lambda_{\mathbf{W}}}{n\lambda_{\mathbf{H}}}} \frac{\rho}{K(K-1)} \right) \right)} + \frac{1}{K \left( 1 + \exp \left( \sqrt{\frac{\lambda_{\mathbf{W}}}{n\lambda_{\mathbf{H}}}} \frac{\rho}{K} - b \right) \right)} + \lambda_{\mathbf{b}} b, \quad (12)$$

and  $\rho = \|\mathbf{W}^*\|_F^2$  is the squared Frobenius norm of  $\mathbf{W}^*$ .

**Proof** *The detailed proof is presented in the supplementary, i.e., Theorem S-4, which similar to that of Zhu et al. (2021); Zhou et al. (2022); Lu & Steinerberger (2022), studies lower bounds for the BCE loss in Eq. (3) and finds the conditions for achieving the lower bounds.* ■

Theorem 2 significantly broadens the range of losses that can lead to neural collapse, i.e., the contrastive property (Zhou et al., 2022) is not necessarily satisfied.

**The decision scores.** According to Theorems 1 and 2, when training a classification model with CE or BCE losses, if the loss reaches its minimum and results in the neural collapse, the sample feature  $\mathbf{h}_i^{(k)}$  will converge to its class center  $\bar{\mathbf{h}}^{(k)} = \frac{1}{n} \sum_{i=1}^n \mathbf{h}_i^{(k)}$ , indicating the maximum intra-class compactness. Furthermore, the class center  $\bar{\mathbf{h}}^{(k)}$  becomes a multiple of the corresponding classifier vector  $\mathbf{w}_k$ , and the  $K$  classifier vectors  $\{\mathbf{w}_k\}_{k=1}^K$  will form an ETF, indicating the maximum inter-class distinctiveness. In addition, the positive and negative decision scores without the biases of all

samples will respectively converge to fixed values, i.e., for  $\forall j \neq k \in [K], i \in [n]$ ,

$$s_{\text{pos}}^{(kk,i)} = \mathbf{w}_k^T \mathbf{h}_i^{(k)} \rightarrow \sqrt{\frac{\lambda \mathbf{W}}{n \lambda_H}} \frac{\rho}{K} \quad \text{and} \quad s_{\text{neg}}^{(jk,i)} = \mathbf{w}_j^T \mathbf{h}_i^{(k)} \rightarrow -\sqrt{\frac{\lambda \mathbf{W}}{n \lambda_H}} \frac{\rho}{K(K-1)}. \quad (13)$$

**The classifier bias.** Comparing Theorems 1 and 2, one can find that the primary difference between CE and BCE losses lies in their classifier bias parameter. According to Theorem 1, when  $\lambda_b > 0$ , the minimum point of CE loss satisfies  $\mathbf{b} = \mathbf{0}$ , separating the final positive and negative scores in Eq. (13); when  $\lambda_b = 0$ , any point that satisfies properties (7) - (11) and  $\mathbf{b} = b^* \mathbf{1}$  is a minimum point of CE loss, which implies that the minimum points of CE loss form a ridge line in term of  $\mathbf{b}$ . In contrast, the classifier bias  $\mathbf{b}$  at the minimum points of BCE loss satisfy Eq. (12) whenever  $\lambda_b = 0$  or not. According to Lemma 5 in the supplementary, Eq. (12) has only one solution, indicating that the BCE loss has only one minimum point in term of  $\mathbf{b}$ . This optimal classifier bias  $\mathbf{b} = b^* \mathbf{1}$  will separate the positive and negative decision scores if it satisfies the Eq. (165) (see Lemma 6 in supplementary for details). Both of the optimal points of CE and BCE losses are associated with the unified classifier bias  $\mathbf{b} = b^* \mathbf{1}$ , which is aligned with the unified bias integrated loss designed by Wen et al. (2022) and Zhou et al. (2023) for facial recognition.

### 3.3 THE DECISION SCORES IN TRAINING WITH BCE AND CE

Though the intra-class compactness and inter-class distinctiveness of sample features can be theoretically maximized by both CE and BCE, the two losses perform very different in practical training of classification models. We here compare the decision scores in the model training by using BCE and CE, to explain their difference in enhancing the feature properties.

**A geometric comparison for CE and BCE.** In practical training with CE or BCE, to minimize the loss, it is desirable for their exponential function variables to be as small as possible, and less than zero at least. For CE in Eq. (1), it is desirable that, for  $\forall \ell \neq k \in [K]$ ,

$$\underbrace{\mathbf{w}_k \mathbf{h}^{(k)} - b_k}_{\text{positive decision score}} > \underbrace{\mathbf{w}_\ell \mathbf{h}^{(k)} - b_\ell}_{\text{negative decision score}}, \quad (14)$$

while, for BCE in Eq. (2), it is desirable that, for  $\forall j \neq k \in [K]$ ,

$$\mathbf{w}_k \mathbf{h}^{(k)} - b_k > 0, \quad (15)$$

$$\mathbf{w}_j \mathbf{h}^{(k)} - b_j < 0. \quad (16)$$

As Fig. 1 shows, we apply the distance of vectors to reflect their inner product or similarity in the metric space. Without considering the bias  $\mathbf{b}$ , the CE loss push feature vector  $\mathbf{h}^{(k)}$  closer to its classifier vector  $\mathbf{w}_k$  compared to others  $\{\mathbf{w}_\ell\}_{\ell \neq k}$ , implying a *unbounded* feature space for each category and bad intra-class compactness. In addition, any two unbounded feature spaces introduced by CE could share the same decision boundary, indicating bad inter-class distinctiveness. In the training with CE, the bias  $b_k$  acts as a compensation to adjust the distance/decision score between the sample features and the classifier vector, introducing indirect constraint across sample features by Eq. (14). This constraint will vanish if  $b_k = b_\ell$  for  $\forall k, \ell \in [K]$ , which could be reached at the minimum points of CE according to Theorem 1. Overall, in the training of classification models, CE does not require absolutely large positive decision scores or absolutely small negative ones, but only requires the positive one to be relatively greater than the negative ones for each sample, thereby implicitly enhancing the features' properties by correctly classifying samples one-by-one.

In contrast, for BCE, Eq. (15) requires the feature  $\mathbf{h}^{(k)}$  to fall within a *closed* hypersphere centered at its classifier vector  $\mathbf{w}_k$  with a "radius" of  $b_k$ , while Eq. (16) requires that any two hypersphere

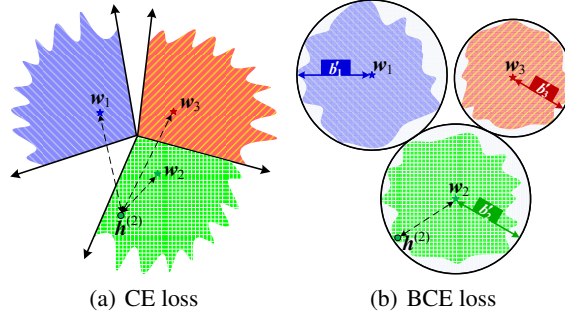

Figure 1: The feature distributions of CE and BCE losses in the distance space. We apply the blue, red, and green shading to indicate the feature space of three categories, respectively. The pentagrams represent their classifier vectors, and the solid dot represents a general feature vector  $\mathbf{h}^{(2)}$  in the second category. Since the distance between two vectors is inversely proportional to their similarity/inner product, CE loss requires the distance from the feature to its classifier vector to be less than the distance to other classifier vectors, while BCE loss requires the distance to be less than its corresponding bias. Small  $b'_k$  implies large  $b_k$  in Eqs. (15-16).

do not intersect, indicating well intra-class compactness and inter-class distinctiveness. In other words, BCE presents explicitly constraint across-samples in the training. While Eq. (15) requires the positive decision scores of all samples are uniformly larger than threshold  $t = 0$ , Eq. (16) requires the negative ones of all samples are uniformly smaller than the unified threshold, i.e.,

$$\min \bigcup_{k=1}^K \bigcup_{i=1}^n \{ \mathbf{w}_k^T \mathbf{h}_i^{(k)} - b_k \} > t \geq \max \bigcup_{k=1}^K \bigcup_{i=1}^n \{ \mathbf{w}_j^T \mathbf{h}_i^{(k)} - b_j \}_{\substack{j=1 \\ j \neq k}}^K, \quad (17)$$

while the unified threshold  $t$  might be not exactly zero in practice. As Eq. (17), BCE expects the positive decision scores to be uniformly high and the negative ones to be uniformly low, which could result in better compactness and distinctiveness than that introduced by Eq. (14). For the  $k$ th category, the bias  $b_k$  would be absorbed into the threshold. In contrary, the bias  $b_k$  explicitly reflect the intra-class compactness of its corresponding category and the inter-class distinctiveness between its category with other different categories. Therefore, BCE can explicitly enhance the compactness and distinctiveness across sample features by learning well biases.

**The decision scores in practical training.** In deep learning, gradient descent and back propagation are the most commonly used techniques for the model training. We here analyze the gradients in terms of the positive decision score  $(\mathbf{w}_k \mathbf{h}_i^{(k)} - b_k)$  and negative one  $(\mathbf{w}_j \mathbf{h}_i^{(k)} - b_j)$  for any sample  $\mathbf{X}_i^{(k)}$  from category  $k$  with  $\forall j \neq k$

$$\frac{\partial f_{ce}(\mathbf{W}, \mathbf{H}, \mathbf{b})}{\partial (\mathbf{w}_k \mathbf{h}_i^{(k)} - b_k)} = \frac{e^{\mathbf{w}_k \mathbf{h}_i^{(k)} - b_k}}{\sum_{\ell} e^{\mathbf{w}_{\ell} \mathbf{h}_i^{(k)} - b_{\ell}}} - 1, \quad \frac{\partial f_{ce}(\mathbf{W}, \mathbf{H}, \mathbf{b})}{\partial (\mathbf{w}_j \mathbf{h}_i^{(k)} - b_j)} = \frac{e^{\mathbf{w}_j \mathbf{h}_i^{(k)} - b_j}}{\sum_{\ell} e^{\mathbf{w}_{\ell} \mathbf{h}_i^{(k)} - b_{\ell}}}, \quad \text{and} \quad (18)$$

$$\frac{\partial f_{bce}(\mathbf{W}, \mathbf{H}, \mathbf{b})}{\partial (\mathbf{w}_k \mathbf{h}_i^{(k)} - b_k)} = \frac{1}{1 + e^{-\mathbf{w}_k \mathbf{h}_i^{(k)} + b_k}} - 1, \quad \frac{\partial f_{bce}(\mathbf{W}, \mathbf{H}, \mathbf{b})}{\partial (\mathbf{w}_j \mathbf{h}_i^{(k)} - b_j)} = \frac{1}{1 + e^{-\mathbf{w}_j \mathbf{h}_i^{(k)} + b_j}}. \quad (19)$$

According to Eq. (18), for any two samples  $\mathbf{X}_i^{(k)}, \mathbf{X}_{i'}^{(k)}$  from the same category  $k$  with diverse initial positive scores, if their predicted probabilities are equal, i.e.,  $\frac{e^{\mathbf{w}_k \mathbf{h}_i^{(k)} - b_k}}{\sum_{\ell} e^{\mathbf{w}_{\ell} \mathbf{h}_i^{(k)} - b_{\ell}}} = \frac{e^{\mathbf{w}_k \mathbf{h}_{i'}^{(k)} - b_k}}{\sum_{\ell} e^{\mathbf{w}_{\ell} \mathbf{h}_{i'}^{(k)} - b_{\ell}}}$ , which is somewhat likely to occur during the practical training, then their positive scores will experience the same update of amplitude during back propagation. Consequently, it will be difficult to update the positive scores to the uniformly high level, impeding the enhancement of intra-class compactness within the same category. A similar phenomenon can also occur with the negative decision scores, resulting in unsatisfactory inter-class distinctiveness in the training with CE loss.

In contrast, according to Eq. (19), during training with BCE loss, the large positive decision scores  $(\mathbf{w}_k \mathbf{h}_i^{(k)} - b_k)$  were updated for the small amplitude  $1 - \frac{1}{1 + \exp(-\mathbf{w}_k \mathbf{h}_i^{(k)} + b_k)}$ , while the small ones were updated for the large update amplitude, facilitating a more rapid adjustment of positive scores across different samples to a uniform high level, to enhance the intra-class compactness of sample features. For the negative decision scores, similarly, the large/small score will be updated with large/small amplitudes in the training with BCE loss to adjust them to a uniform low level, enhancing the inter-class distinctiveness.

**The classifier bias in practice.** During the model training, the classifier bias is also updated through the gradient descent, and the positive and negative decision scores are constrained by approaching the stable point of the bias. For CE, the gradient of bias  $b_k$  is

$$\frac{\partial f_{ce}}{\partial b_k} = \frac{1}{nK} \left( n - \sum_{j=1}^K \sum_{i=1}^n \frac{e^{\mathbf{w}_k \mathbf{h}_i^{(j)} - b_k}}{\sum_{\ell} e^{\mathbf{w}_{\ell} \mathbf{h}_i^{(j)} - b_{\ell}}} \right) + \lambda_b b_k \rightarrow \lambda_b b. \quad (20)$$

As approaching the stable point of the bias, i.e., the points satisfying  $\frac{\partial f_{ce}}{\partial b_k} = 0$ , Eq. (20) presents constraint on the relative value of the exponential decision scores. This constraint will vanish as reaching the minimum of CE, and the bias gradient  $\frac{\partial f_{ce}}{\partial b_k}$  approaches  $\lambda_b b$ , according to Eq. (13). At the minimum points, the update amplitude of bias is  $\eta \lambda_b b$ , where  $\eta$  denotes the learning rate. If  $\lambda_b = 0$ , the update is zero, and the final bias can locate at any point on the ridge line  $\mathbf{b} = b\mathbf{1}$ , where  $b$  is depended on some other factors, such as the bias initial value, but not the relationship between the bias and the decision scores. If  $\lambda_b > 0$ , one can concluded  $b = 0$ ; however, in practice, this

theoretical value might be not reached due to that  $\eta\lambda_{\mathbf{b}}$  will be very small at the terminal phase of practical training. The above analysis implies that the classifier bias, in the training with CE, cannot provide consistent and explicit constraints on the decision scores, and thus almost does not affect the final features’ properties.

In contrast, for BCE, the gradient of bias  $b_k$  is

$$\frac{\partial f_{\text{bce}}}{\partial b_k} = \frac{1}{nK} \left( n - \sum_{j=1}^K \sum_{i=1}^n \frac{1}{1 + e^{-\mathbf{w}_k \mathbf{h}_i^{(j)} + b_k}} \right) + \lambda_{\mathbf{b}} b_k \rightarrow \text{RHS of Eq. (12)}, \quad (21)$$

which presents clear constraint on the absolute value of the exponential decision scores for the all samples. The constraint evolve into Eq. (12) when BCE reaches its minimum points. Therefore, as approaching the stable point, the classifier bias consistently and explicitly constrain the decision scores, regardless  $\lambda_{\mathbf{b}} = 0$  or not, and it will separate the final positive and negative decision scores if Eq. (165) holds. In other words, the classifier bias in BCE plays a substantial role in enhancing the final features’ properties.

## 4 EXPERIMENTS

To compare CE and BCE in deep feature learning, we train deep classification models, ResNet18 (He et al., 2016), ResNet50 (He et al., 2016), and DenseNet121 (Huang et al., 2017), using the two losses respectively, on three popular datasets, including MNIST (LeCun et al., 1998), CIFAR10 (Krizhevsky et al., 2009), and CIFAR100 (Krizhevsky et al., 2009). We train the models using SGD and AdamW for 100 epochs with batch size of 128. The initial learning rate is set to 0.01 and 0.001 for SGD and AdamW, which is respectively decayed in “step” and “cosine” schedulers.

### 4.1 MAXIMIZING COMPACTNESS AND DISTINCTIVENESS BY BCE AND CE

We first experimentally illustrate that both BCE and CE can maximize the intra-class compactness and inter-class distinctiveness among sample features, i.e., resulting in neural collapse (NC). Similar to (Zhu et al., 2021; Zhou et al., 2022), we do not apply any data augmentation in the experiments of NC, and adopt the metrics,  $\mathcal{NC}_1$ ,  $\mathcal{NC}_2$ , and  $\mathcal{NC}_3$  (see supplementary for their definitions), to measure the properties of NC1, NC2, and NC3. The lower metrics reflect the better NC properties.

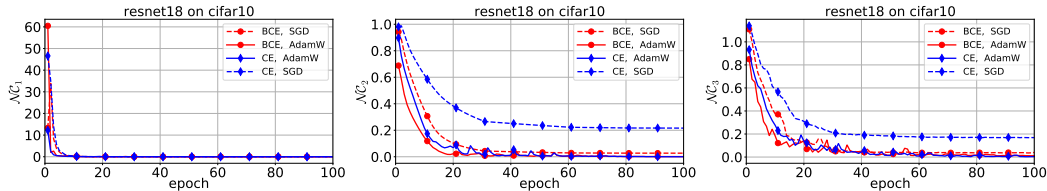

Figure 2: NC metrics of ResNet18 trained on CIFAR10 with CE and BCE using SGD and AdamW, respectively. The NC metrics of CE and BCE approach zero at the terminal phase of training, while the NC metrics of BCE decrease faster than that of CE in the first 20 epochs.

In the training, we set  $\lambda_{\mathbf{W}} = \lambda_{\mathbf{H}} = \lambda_{\mathbf{b}} = 5 \times 10^{-4}$ , and no weight decay is applied on the other parameters of the model  $\mathcal{M}$ . Fig. 2 shows the NC results of ResNet18 trained by CE and BCE with two optimizers on CIFAR10, and the other results are presented in the supplementary. In the figure, the red curves with dot markers exhibit the evolution of the metrics  $\mathcal{NC}_1$ ,  $\mathcal{NC}_2$ ,  $\mathcal{NC}_3$  of BCE, and the blue curves with diamond markers exhibit that of CE. All the three NC metrics consistently approach zero in the training with different losses and optimizers, which matches the conclusions of Theorem 1 and 2. In the initial training stage (the first 20 epochs), the NC metrics of BCE usually decrease faster than that of CE, implying that BCE is easier to result in NC.

**The final classifier bias and decision scores.** As reaching NC and maximizing the feature compactness and distinctiveness, the final classifier biases and the positive/negative decision scores will converge to fixed values. We compute their means and standard deviations for the different models on the training set. Table 1 shows the results on CIFAR10. Except for that of ResNet50 and DenseNet121 trained by SGD, the standard deviations of the final decision scores and classifier biases are very small, and less than 0.3 when the models are trained using AdamW, indicating that the

diverse classifier biases are almost equal, so are all the final positive/negative decision scores. As  $\lambda_b > 0$ , the final classifier biases are near zero ( $\hat{b} \approx 0$ ) in the CE-trained models, while, in the BCE-trained models, the biases make that the function ( $\alpha(b)$  in Table 1) on the RHS of Eq. (12) almost degenerate to zero, i.e.,  $\alpha(\hat{b}) \approx 0$ , aligning with our analysis.

**The failures in NC.** According to the results in Table 1, one can find that NC might be not caused by the ResNet50 and DenseNet121 trained by SGD. Though the classification accuracy ( $\mathcal{A}$ ) of the two models are higher than 99.00% (almost 100%), their positive and negative decision scores have large standard deviations, implying that the decision scores have not converged to the fixed values and conflict with the results (Eq. (13)) of neural collapse. It still requires a long time training to reach the neural collapse, after zero classification error. More discussions can be found in the supplementary.

Table 1: The means and standard deviations of positive/negative decision scores ( $s_{\text{pos}}$ ,  $s_{\text{neg}}$ , without bias) and the classifier biases ( $\hat{b}$ ) of the models trained by CE and BCE on CIFAR10 with  $\lambda_W = \lambda_H = \lambda_b = 5 \times 10^{-4}$ . The score values are computed on the training set, and  $\mathcal{A}$  denotes the classification accuracy on the training set.

| $\mathcal{M}$ |                   | CIFAR10          |                  |                  |                  |
|---------------|-------------------|------------------|------------------|------------------|------------------|
|               |                   | SGD              |                  | AdamW            |                  |
|               |                   | CE               | BCE              | CE               | BCE              |
| ResNet18      | $s_{\text{pos}}$  | $5.71 \pm 0.23$  | $6.56 \pm 0.20$  | $5.64 \pm 0.06$  | $7.50 \pm 0.05$  |
|               | $s_{\text{neg}}$  | $-0.64 \pm 0.36$ | $-3.46 \pm 0.19$ | $-0.63 \pm 0.01$ | $-2.36 \pm 0.02$ |
|               | $\hat{b}$         | $-0.01 \pm 0.04$ | $2.26 \pm 0.07$  | $-0.00 \pm 0.00$ | $3.29 \pm 0.01$  |
|               | $\alpha(\hat{b})$ | —                | -0.03            | —                | -0.01            |
|               | $\mathcal{A}$     | 99.99            | 100.0            | 100.0            | 100.0            |
| ResNet50      | $s_{\text{pos}}$  | $5.74 \pm 8.21$  | $6.56 \pm 4.39$  | $5.64 \pm 0.11$  | $7.44 \pm 0.28$  |
|               | $s_{\text{neg}}$  | $-0.64 \pm 14.1$ | $-3.57 \pm 7.01$ | $-0.63 \pm 0.02$ | $-2.45 \pm 0.22$ |
|               | $\hat{b}$         | $0.00 \pm 0.14$  | $2.40 \pm 0.15$  | $-0.00 \pm 0.01$ | $3.21 \pm 0.03$  |
|               | $\alpha(\hat{b})$ | —                | -0.02            | —                | -0.01            |
|               | $\mathcal{A}$     | 99.61            | 99.65            | 99.99            | 100.0            |
| DenseNet121   | $s_{\text{pos}}$  | $5.72 \pm 1.72$  | $6.24 \pm 0.84$  | $5.62 \pm 0.29$  | $7.67 \pm 0.12$  |
|               | $s_{\text{neg}}$  | $-0.63 \pm 0.87$ | $-3.62 \pm 1.63$ | $-0.62 \pm 0.03$ | $-2.17 \pm 0.06$ |
|               | $\hat{b}$         | $0.00 \pm 0.04$  | $2.09 \pm 0.12$  | $0.00 \pm 0.01$  | $3.46 \pm 0.02$  |
|               | $\alpha(\hat{b})$ | —                | -0.03            | —                | -0.01            |
|               | $\mathcal{A}$     | 99.40            | 99.72            | 99.87            | 100.0            |

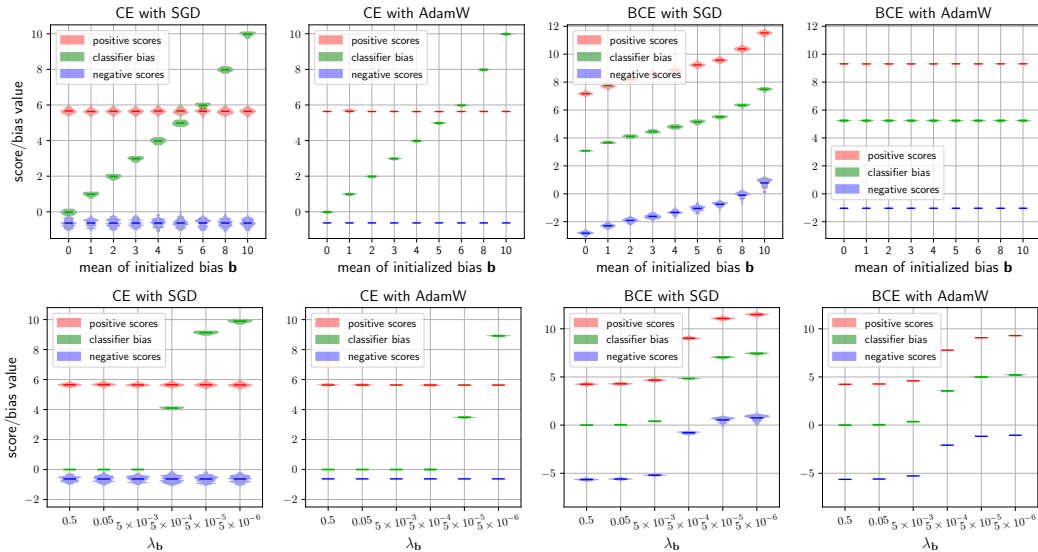

Figure 3: The distributions of the final classifier bias and positive/negative decision scores for ResNet18 trained on MNIST with fixed weight decay factor  $\lambda_b$  (top) and varying  $\lambda_b$  (bottom), while  $\lambda_W = \lambda_H = 5 \times 10^{-4}$ . The mean of initialized bias  $\mathbf{b}$  is respectively set as 0, 1, 2, 3, 4, 5, 6, 8, 10 in the experiments with fixed  $\lambda_b = 0$ , and the bias mean is set as 10 in the experiments with varying  $\lambda_b$ .

**The bias decay factor  $\lambda_b$ .** To illustrate the different effects of classifier bias of CE and BCE on the decision scores, we conduct two groups of experiments by respectively applying fixed and varying classifier bias decay factor  $\lambda_b$  in the training of ResNet18 on MNIST: (1) with fixed  $\lambda_b = 0$  and default other hyper-parameters, respectively, setting the mean of the initialized classifier bias to 0, 1, 2, 3, 4, 5, 6, 8, and 10; (2) with varying  $\lambda_b = 0.5, 0.05, 5 \times 10^{-3}, 5 \times 10^{-4}, 5 \times 10^{-5}$ , and  $5 \times 10^{-6}$ , respectively, setting the mean of initialized classifier bias to 10. Fig. 3 shows the distributions of final classifier bias and positive/negative decision scores (without bias) using violin plots for the models in these experiments, while the numerical results are presented in Tables S-8 and S-9 in supplementary. One can find from Fig. 3(top), for the CE-trained models with  $\lambda_b = 0$ , the final classifier bias values are almost entirely determined by their initial values, no matter which



optimizer was applied. For the CE-trained models in Fig. 3(bottom), the means of the final classifier bias reach to zero from the initial mean of 10 with appropriate larger  $\lambda_b$  ( $\geq 5 \times 10^{-3}$  for SGD and  $\geq 5 \times 10^{-4}$  for AdamW), and they do not achieve the theoretical value when  $\lambda_b$  is too small. As a comparison, for the all CE-trained models, their final positive and negative decision scores respectively converge to around 5.64 and  $-0.63$  (see supplementary for details). In total, in CE-trained models, the classifier bias hardly affects the decision scores, and thus almost does not affect the final feature properties.

In contrast, for the BCE-trained models in Fig. 3, their final positive and negative decision scores are always separated by the final classifier biases, no matter what the initial mean of classifier bias,  $\lambda_b$ , or optimizer are, and clear correlation exists between the bias and positive/negative decision scores. These results imply that, in the training with BCE, the classifier bias has a substantial impact on the sample feature distribution, thereby enhancing the compactness and distinctiveness across samples.

#### 4.2 BCE PERFORMING BETTER THAN CE IN ENHANCING FEATURE PROPERTIES

To further demonstrate that BCE performs better than CE in enhancing the intra-class compactness and inter-class distinctiveness of sample features in the practical training, we train the three classification models by applying two different data augmentation techniques, (1) DA1: random cropping and horizontal flipping, (2) DA2: Mixup and CutMix, on CIFAR10 and CIFAR100 using SGD and AdamW, respectively. In the experiments, we take a global weight decay factor  $\lambda$  for the all parameters in the models, including the classifier weight and bias, and  $\lambda = 5 \times 10^{-4}$  for SGD,  $\lambda = 0.05$  for AdamW. The other hyper-parameters are presented in the supplementary. To compare the results of BCE and CE, besides the classification

Table 2: The classification on the test set of CIFAR10 and CIFAR100. The accuracy ( $\mathcal{A}$ ) of most BCE-trained models is higher than that of CE-trained ones, while BCE-trained models perform consistently and significantly better than CE-trained models in terms of uniform accuracy ( $\mathcal{A}_{\text{Uni}}$ ).

| $\mathcal{D}$ | $\mathcal{M}$ | Loss     | SGD           |                            |               |                            | AdamW         |                            |               |                            |
|---------------|---------------|----------|---------------|----------------------------|---------------|----------------------------|---------------|----------------------------|---------------|----------------------------|
|               |               |          | DA1           |                            | DA1+DA2       |                            | DA1           |                            | DA1+DA2       |                            |
|               |               |          | $\mathcal{A}$ | $\mathcal{A}_{\text{Uni}}$ | $\mathcal{A}$ | $\mathcal{A}_{\text{Uni}}$ | $\mathcal{A}$ | $\mathcal{A}_{\text{Uni}}$ | $\mathcal{A}$ | $\mathcal{A}_{\text{Uni}}$ |
| CIFAR10       | R18           | CE       | 92.82         | 85.20                      | 92.71         | 89.08                      | 93.36         | 88.97                      | 95.72         | 94.34                      |
|               |               | BCE      | 93.22         | 91.92                      | 93.64         | 91.87                      | 93.95         | 93.37                      | 95.57         | 95.16                      |
|               |               | $\Delta$ | +0.40         | +6.72                      | +0.93         | +2.79                      | +0.59         | +4.40                      | -0.15         | +0.82                      |
|               | R50           | CE       | 92.69         | 85.23                      | 92.74         | 89.58                      | 94.48         | 87.86                      | 96.00         | 94.31                      |
|               |               | BCE      | 93.40         | 92.48                      | 93.20         | 91.50                      | 94.02         | 93.55                      | 96.15         | 95.72                      |
|               |               | $\Delta$ | +0.71         | +7.25                      | +0.46         | +1.92                      | -0.46         | +5.69                      | +0.15         | +1.41                      |
|               | D121          | CE       | 87.87         | 78.67                      | 86.65         | 81.54                      | 90.42         | 83.62                      | 92.55         | 90.70                      |
|               |               | BCE      | 88.66         | 87.58                      | 87.78         | 84.95                      | 90.55         | 89.91                      | 92.59         | 91.78                      |
|               |               | $\Delta$ | +0.79         | +8.91                      | +1.13         | +3.41                      | +0.13         | +6.29                      | +0.04         | +1.08                      |
| CIFAR100      | R18           | CE       | 71.16         | 43.21                      | 71.76         | 56.66                      | 71.69         | 49.17                      | 76.53         | 64.43                      |
|               |               | BCE      | 72.16         | 63.33                      | 72.34         | 62.89                      | 73.15         | 66.27                      | 76.70         | 69.96                      |
|               |               | $\Delta$ | +1.00         | +20.1                      | +0.58         | +6.23                      | +1.46         | +17.1                      | +0.17         | +5.53                      |
|               | R50           | CE       | 71.60         | 44.20                      | 70.32         | 55.17                      | 74.95         | 48.79                      | 78.58         | 67.79                      |
|               |               | BCE      | 71.75         | 64.07                      | 71.87         | 62.82                      | 75.25         | 68.84                      | 78.47         | 72.68                      |
|               |               | $\Delta$ | +0.15         | +19.9                      | +1.55         | +7.65                      | +0.30         | +20.1                      | -0.11         | +4.89                      |
|               | D121          | CE       | 60.79         | 32.93                      | 57.23         | 39.82                      | 63.65         | 38.76                      | 68.99         | 57.15                      |
|               |               | BCE      | 61.10         | 53.47                      | 58.35         | 47.68                      | 63.56         | 57.28                      | 69.40         | 63.52                      |
|               |               | $\Delta$ | +0.21         | +20.5                      | +1.12         | +7.85                      | -0.09         | +18.5                      | +0.41         | +6.37                      |

accuracy ( $\mathcal{A}$ ), we define and apply three other metrics, uniform accuracy ( $\mathcal{A}_{\text{Uni}}$ ), compactness ( $\mathcal{E}_{\text{com}}$ ), and distinctiveness ( $\mathcal{E}_{\text{dis}}$ ), seeing Eqs. (43,47,48) in supplementary for the definitions. While  $\mathcal{A}_{\text{Uni}}$  is evolved from Eq. (17), it is calculated on the decision scores across samples, simultaneously reflecting the feature compactness and distinctiveness; as their name implies,  $\mathcal{E}_{\text{com}}$  and  $\mathcal{E}_{\text{dis}}$  respectively measure the intra-class compactness and inter-class distinctiveness among sample features.

Table 2 shows the classification results of the three models (“R18”, “R50”, and “D121” respectively stand for ResNet18, ResNet50, and DenseNet121) on the test set of CIFAR10 and CIFAR100. From the table, one can find that, BCE is better than CE in term of accuracy ( $\mathcal{A}$ ) in most cases, and it performs consistently and significantly superior to CE in term of uniform accuracy ( $\mathcal{A}_{\text{Uni}}$ ). Taking CIFAR10 for example, among the twelve pairs of models trained by CE and BCE, BCE slightly reduced the accuracy of two pairs of models, while the gain of uniform accuracy introduced by BCE is 0.82% at least for the all models. For CIFAR100, the gain of BCE in uniform accuracy could be more than 20%, and the classification accuracy of BCE is still higher than that of CE in most cases. These results illustrate that BCE can usually achieve better classification results than CE, which is likely resulted from its enhancement in compactness and distinctiveness among sample features.

Furthermore, similar to BCE, the better data augmentation techniques and optimizer can simultaneously improve the classification results of models. For example, Mixup, CutMix, and AdamW

increase  $\mathcal{A}$  and  $\mathcal{A}_{\text{Uni}}$  from 92.82% and 85.20% to 95.72% and 94.34%, respectively, for ResNet18 trained on CIFAR10. In addition, the higher performance of BCE than CE with only DA1 implies that the superiority of BCE is not resulted from the alignment with Mixup and CutMix, which is not consistent with the statements about BCE by Wightman et al. (2021).

As the uniform accuracy simultaneously reflect the intra-class compactness and inter-class distinctiveness, the higher uniform accuracy  $\mathcal{A}_{\text{Uni}}$  of BCE-trained models implies their better feature properties. Table 3 presents the compactness ( $\mathcal{E}_{\text{com}}$ ) and distinctiveness ( $\mathcal{E}_{\text{dis}}$ ) of the trained models. One can clearly observe that, in most cases, BCE improves the compactness and distinctiveness of the sample features extracted by the models compared to CE,

Table 3: The feature properties on the test set of CIFAR10 and CIFAR100. The feature compactness ( $\mathcal{E}_{\text{com}}$ ) and distinctiveness ( $\mathcal{E}_{\text{dis}}$ ) of BCE-trained models are usually better than that of CE-trained models. See supplementary for the definitions of  $\mathcal{E}_{\text{com}}$  and  $\mathcal{E}_{\text{dis}}$ .

| $\mathcal{D}$ | $\mathcal{M}$ | Loss | SGD                        |                            |                            |                            | AdamW                      |                            |                            |                            |
|---------------|---------------|------|----------------------------|----------------------------|----------------------------|----------------------------|----------------------------|----------------------------|----------------------------|----------------------------|
|               |               |      | DA1                        |                            | DA1+DA2                    |                            | DA1                        |                            | DA1+DA2                    |                            |
|               |               |      | $\mathcal{E}_{\text{com}}$ | $\mathcal{E}_{\text{dis}}$ | $\mathcal{E}_{\text{com}}$ | $\mathcal{E}_{\text{dis}}$ | $\mathcal{E}_{\text{com}}$ | $\mathcal{E}_{\text{dis}}$ | $\mathcal{E}_{\text{com}}$ | $\mathcal{E}_{\text{dis}}$ |
| CIFAR10       | R18           | CE   | 0.8541                     | 0.2553                     | 0.8148                     | 0.2088                     | 0.8546                     | 0.2694                     | 0.8929                     | 0.3307                     |
|               |               | BCE  | <b>0.9056</b>              | <b>0.3049</b>              | <b>0.8438</b>              | <b>0.2387</b>              | <b>0.9140</b>              | <b>0.3254</b>              | <b>0.9178</b>              | <b>0.3669</b>              |
|               | R50           | CE   | 0.8351                     | 0.1782                     | 0.8564                     | 0.2027                     | 0.8547                     | 0.2332                     | <b>0.9529</b>              | <b>0.3782</b>              |
|               |               | BCE  | <b>0.8990</b>              | <b>0.2322</b>              | <b>0.8693</b>              | <b>0.2161</b>              | <b>0.8912</b>              | <b>0.2720</b>              | 0.9168                     | 0.3569                     |
|               | D121          | CE   | 0.7874                     | 0.3123                     | 0.7672                     | 0.2805                     | 0.7463                     | 0.3070                     | 0.8201                     | <b>0.3194</b>              |
|               |               | BCE  | <b>0.8458</b>              | <b>0.3319</b>              | <b>0.8089</b>              | <b>0.2973</b>              | <b>0.8302</b>              | <b>0.3371</b>              | <b>0.8371</b>              | 0.3190                     |
| CIFAR100      | R18           | CE   | 0.7234                     | <b>0.2699</b>              | 0.7127                     | 0.2575                     | 0.6923                     | 0.2895                     | 0.7140                     | <b>0.3073</b>              |
|               |               | BCE  | <b>0.7331</b>              | 0.2624                     | <b>0.7289</b>              | <b>0.2688</b>              | <b>0.7265</b>              | <b>0.2930</b>              | <b>0.7422</b>              | 0.2906                     |
|               | R50           | CE   | 0.7084                     | 0.2002                     | 0.7101                     | 0.1866                     | 0.6886                     | 0.2581                     | 0.7229                     | <b>0.3646</b>              |
|               |               | BCE  | <b>0.7326</b>              | <b>0.2196</b>              | <b>0.7400</b>              | <b>0.2184</b>              | <b>0.7517</b>              | <b>0.2783</b>              | <b>0.7631</b>              | 0.3254                     |
|               | D121          | CE   | 0.7120                     | <b>0.3097</b>              | 0.7280                     | <b>0.3171</b>              | 0.6472                     | 0.2981                     | 0.6998                     | <b>0.3403</b>              |
|               |               | BCE  | <b>0.7324</b>              | 0.2947                     | <b>0.7363</b>              | 0.3049                     | <b>0.7091</b>              | <b>0.3008</b>              | <b>0.7262</b>              | 0.3259                     |

which is consistent with our expectations and provides a solid and reasonable explanation for the higher performance of BCE in tasks that require feature comparison, such as facial recognition and verification (Wen et al., 2022; Zhou et al., 2023).

Fig. 4 visually shows the feature distributions on the testing data of CIFAR10 for ResNet18 trained by CE (left) and BCE (right) with “DA1+DA2” and AdamW. One can find that, for CE-trained model, its feature distributions for categories 3 and 5 (i.e., “cat” and “dog”) overlap with each other, and the sample features of the third category exhibit clear internal dispersion; in contrast, the features of BCE-trained ResNet18 for these categories are distributed in more compact areas and have significant gaps between them, implying better feature compactness and distinctiveness.

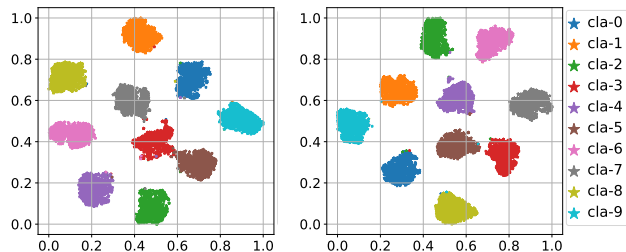

Figure 4: Distributions of features extracted by ResNet18 trained on CIFAR10 using CE (left) and BCE (right) in t-SNE.

## 5 CONCLUSIONS

This paper compares CE and BCE losses in deep feature learning. Both the losses can maximize the intra-class compactness and inter-class distinctiveness among sample features, i.e., leading to neural collapse when reaching their minimums. In the training, CE implicitly enhances the feature properties by correctly classifying samples one-by-one. In contrast, BCE can adjust the positive and negative decision scores across samples, and, in this process, its classifier bias plays a substantial and consistent role, making it explicitly enhance the intra-class compactness and inter-class distinctiveness of features. Therefore, BCE can usually achieve better classification performance.

**Limitations.** The decision scores measure the inner product/similarity of sample features to each classifier vector, which reflect the feature properties. However, it does not directly calculate the measurements among samples, nor can it be used to directly measure the compactness and distinctiveness of sample features. In the future, we will analyze the CE and BCE losses used for feature contrastive learning and compare the feature properties brought by them.

## REFERENCES

- 540  
541  
542 Mouin Ben Ammar, Nacim Belkhir, Sebastian Popescu, Antoine Manzanera, and Gianni Franchi.  
543 NECO: Neural collapse based out-of-distribution detection. In *International Conference on*  
544 *Learning Representations*, 2024.
- 545  
546 Lucas Beyer, Olivier J Hénaff, Alexander Kolesnikov, Xiaohua Zhai, and Aäron van den Oord. Are  
547 we done with ImageNet? *arXiv preprint arXiv:2006.07159*, 2020.
- 548  
549 Yidong Cai, Jie Liu, Jie Tang, and Gangshan Wu. Robust object modeling for visual tracking.  
550 In *Proceedings of the IEEE/CVF International Conference on Computer Vision*, pp. 9589–9600,  
2023.
- 551  
552 Sanghyuk Chun. Improved probabilistic image-text representations. In *The Twelfth International*  
553 *Conference on Learning Representations*, 2024.
- 554  
555 Cong Fang, Hangfeng He, Qi Long, and Weijie J Su. Exploring deep neural networks via layer-  
556 peeled model: Minority collapse in imbalanced training. *Proceedings of the National Academy*  
*of Sciences*, 118(43):e2103091118, 2021.
- 557  
558 Yuxin Fang, Li Dong, Hangbo Bao, Xinggang Wang, and Furu Wei. Corrupted image modeling  
559 for self-supervised visual pre-training. In *International Conference on Learning Representations*,  
2023.
- 560  
561 Florian Graf, Christoph Hofer, Marc Niethammer, and Roland Kwitt. Dissecting supervised con-  
562 trastive learning. In *International Conference on Machine Learning*, pp. 3821–3830. PMLR,  
2021.
- 563  
564 Meng-Hao Guo, Cheng-Ze Lu, Qibin Hou, Zhengning Liu, Ming-Ming Cheng, and Shi-Min Hu.  
565 SegNeXt: Rethinking convolutional attention design for semantic segmentation. *Advances in*  
566 *Neural Information Processing Systems*, 35:1140–1156, 2022.
- 567  
568 X. Y. Han, Vardan Papayan, and David L. Donoho. Neural collapse under mse loss: Proximity to and  
569 dynamics on the central path. In *International Conference on Learning Representations*, 2022.
- 570  
571 Zhiwei Hao, Jianyuan Guo, Kai Han, Han Hu, Chang Xu, and Yunhe Wang. Revisit the power of  
572 vanilla knowledge distillation: from small scale to large scale. *Advances in Neural Information*  
*Processing Systems*, 36, 2024.
- 573  
574 Kaiming He, Xiangyu Zhang, Shaoqing Ren, and Jian Sun. Delving deep into rectifiers: Surpassing  
575 human-level performance on imagenet classification. In *Proceedings of the IEEE international*  
576 *conference on computer vision*, pp. 1026–1034, 2015.
- 577  
578 Kaiming He, Xiangyu Zhang, Shaoqing Ren, and Jian Sun. Deep residual learning for image recog-  
579 nition. In *Proceedings of the IEEE conference on computer vision and pattern recognition*, pp.  
770–778, 2016.
- 580  
581 Shuting He, Hao Luo, Pichao Wang, Fan Wang, Hao Li, and Wei Jiang. TransReID: Transformer-  
582 based object re-identification. In *Proceedings of the IEEE/CVF international conference on com-*  
*puter vision*, pp. 15013–15022, 2021.
- 583  
584 Gao Huang, Zhuang Liu, Laurens Van Der Maaten, and Kilian Q Weinberger. Densely connected  
585 convolutional networks. In *Proceedings of the IEEE conference on computer vision and pattern*  
586 *recognition*, pp. 4700–4708, 2017.
- 587  
588 Hoyong Kim and Kangil Kim. Fixed non-negative orthogonal classifier: Inducing zero-mean neural  
589 collapse with feature dimension separation. In *International Conference on Learning Represen-*  
*tations*, 2024.
- 590  
591 Takumi Kobayashi. Two-way multi-label loss. In *Proceedings of the IEEE/CVF Conference on*  
592 *Computer Vision and Pattern Recognition*, pp. 7476–7485, 2023.
- 593  
Vignesh Kothapalli. Neural collapse: A review on modelling principles and generalization. *Trans-*  
*actions on Machine Learning Research*, 2023.

- 594 Alex Krizhevsky, Geoffrey Hinton, et al. Learning multiple layers of features from tiny images.  
595 2009.
- 596 Yann LeCun, Léon Bottou, Yoshua Bengio, and Patrick Haffner. Gradient-based learning applied to  
597 document recognition. *Proceedings of the IEEE*, 86(11):2278–2324, 1998.
- 599 Tsung-Yi Lin, Priya Goyal, Ross Girshick, Kaiming He, and Piotr Dollár. Focal loss for dense  
600 object detection. In *Proceedings of the IEEE international conference on computer vision*, pp.  
601 2980–2988, 2017.
- 602 Weiyang Liu, Yandong Wen, Zhiding Yu, and Meng Yang. Large-margin softmax loss for convolu-  
603 tional neural networks. In *International Conference on Machine Learning*, pp. 507–516. PMLR,  
604 2016.
- 606 Jianfeng Lu and Stefan Steinerberger. Neural collapse under cross-entropy loss. *Applied and Com-  
607 putational Harmonic Analysis*, 59:224–241, 2022.
- 608 Sachin Mehta and Mohammad Rastegari. Separable self-attention for mobile vision transformers.  
609 *Transactions on Machine Learning Research*, 2023.
- 611 Vardan Papyan, X. Y. Han, and David L. Donoho. Prevalence of neural collapse during the terminal  
612 phase of deep learning training. *Proceedings of the National Academy of Sciences*, 117(40):  
613 24652–24663, 2020.
- 614 Christian Szegedy, Vincent Vanhoucke, Sergey Ioffe, Jon Shlens, and Zbigniew Wojna. Rethink-  
615 ing the inception architecture for computer vision. In *Proceedings of the IEEE conference on  
616 computer vision and pattern recognition*, pp. 2818–2826, 2016.
- 618 Tom Tirer and Joan Bruna. Extended unconstrained features model for exploring deep neural col-  
619 lapse. In *International Conference on Machine Learning*, pp. 21478–21505. PMLR, 2022.
- 620 Hugo Touvron, Matthieu Cord, and Hervé Jégou. DeiT III: Revenge of the ViT. In *European  
621 conference on computer vision*, pp. 516–533. Springer, 2022.
- 623 Feng Wang, Xiang Xiang, Jian Cheng, and Alan Loddon Yuille. NormFace: L2 hypersphere em-  
624 bedding for face verification. In *Proceedings of the 25th ACM international conference on Multi-  
625 media*, pp. 1041–1049, 2017.
- 626 Haoqi Wang, Zhizhong Li, and Wayne Zhang. Get the best of both worlds: Improving accuracy and  
627 transferability by grassmann class representation. In *Proceedings of the IEEE/CVF International  
628 Conference on Computer Vision*, pp. 22478–22487, 2023.
- 629 Yining Wang, Junjie Sun, Chenyue Wang, Mi Zhang, and Min Yang. Navigate beyond shortcuts:  
630 Debaised learning through the lens of neural collapse. In *Proceedings of the IEEE/CVF Confer-  
631 ence on Computer Vision and Pattern Recognition*, pp. 12322–12331, 2024.
- 633 Yandong Wen, Weiyang Liu, Adrian Weller, Bhiksha Raj, and Rita Singh. Sphereface2: Binary  
634 classification is all you need for deep face recognition. In *International Conference on Learning  
635 Representations*, 2022.
- 636 Ross Wightman, Hugo Touvron, and Herve Jegou. ResNet strikes back: An improved training  
637 procedure in timm. In *NeurIPS 2021 Workshop on ImageNet: Past, Present, and Future*, 2021.
- 639 Zhengzhuo Xu, Ruikang Liu, Shuo Yang, Zenghao Chai, and Chun Yuan. Learning imbalanced data  
640 with vision transformers. In *Proceedings of the IEEE/CVF conference on computer vision and  
641 pattern recognition*, pp. 15793–15803, 2023.
- 642 Yibo Yang, Shixiang Chen, Xiangtai Li, Liang Xie, Zhouchen Lin, and Dacheng Tao. Inducing  
643 neural collapse in imbalanced learning: Do we really need a learnable classifier at the end of deep  
644 neural network? *Advances in neural information processing systems*, 35:37991–38002, 2022.
- 646 Sangdoon Yun, Dongyoon Han, Seong Joon Oh, Sanghyuk Chun, Junsuk Choe, and Youngjoon Yoo.  
647 CutMix: Regularization strategy to train strong classifiers with localizable features. In *Proceed-  
ings of the IEEE/CVF international conference on computer vision*, pp. 6023–6032, 2019.

648 Hongyi Zhang, Moustapha Cisse, Yann N Dauphin, and David Lopez-Paz. Mixup: Beyond empirical  
649 risk minimization. In *International Conference on Learning Representations*, 2018.  
650

651 Jiancan Zhou, Xi Jia, Qiufu Li, Linlin Shen, and Jinming Duan. Uniface: Unified cross-entropy  
652 loss for deep face recognition. In *Proceedings of the IEEE/CVF International Conference on  
653 Computer Vision*, pp. 20730–20739, 2023.

654 Jinxin Zhou, Chong You, Xiao Li, Kangning Liu, Sheng Liu, Qing Qu, and Zhihui Zhu. Are all  
655 losses created equal: A neural collapse perspective. *Advances in Neural Information Processing  
656 Systems*, 35:31697–31710, 2022.

657 Zhihui Zhu, Tianyu Ding, Jinxin Zhou, Xiao Li, Chong You, Jeremias Sulam, and Qing Qu. A ge-  
658 ometric analysis of neural collapse with unconstrained features. *Advances in Neural Information  
659 Processing Systems*, 34:29820–29834, 2021.  
660  
661  
662  
663  
664  
665  
666  
667  
668  
669  
670  
671  
672  
673  
674  
675  
676  
677  
678  
679  
680  
681  
682  
683  
684  
685  
686  
687  
688  
689  
690  
691  
692  
693  
694  
695  
696  
697  
698  
699  
700  
701

# BCE vs. CE in Deep Feature Learning

## Supplementary Material

### S-1 NEURAL COLLAPSE AND FEATURE PROPERTY

#### S-1.1 NEURAL COLLAPSE

The neural collapse was first found by Papayan et al. (2020), which refers to four properties about the sample features  $\{\mathbf{h}_i^{(k)}\}$  and the classifier vectors  $\{\mathbf{w}_k\}$  at the terminal phase of training (Han et al., 2022), as list in Sec. 2.2. These four properties can be formulized as follows.

- **NC1**, within-class variability collapse,  $\Sigma_B^\dagger \Sigma_W \rightarrow \mathbf{0}$ , where

$$\Sigma_B = \frac{1}{K} \sum_{k=1}^K (\bar{\mathbf{h}}^{(k)} - \bar{\mathbf{h}})(\bar{\mathbf{h}}^{(k)} - \bar{\mathbf{h}})^T \quad (22)$$

$$\Sigma_W = \frac{1}{\sum_k n_k} \sum_{k=1}^K \sum_{i=1}^{n_k} (\mathbf{h}_i^{(k)} - \bar{\mathbf{h}}^{(k)})(\mathbf{h}_i^{(k)} - \bar{\mathbf{h}}^{(k)})^T \quad (23)$$

$$\bar{\mathbf{h}}^{(k)} = \frac{1}{n_k} \sum_{i=1}^{n_k} \mathbf{h}_i^{(k)}, \quad (24)$$

$$\bar{\mathbf{h}} = \frac{1}{\sum_k n_k} \sum_{k=1}^K \sum_{i=1}^{n_k} \mathbf{h}_i^{(k)} \quad (25)$$

and  $\dagger$  denotes the Moorer-Penrose pseudo-inverse;

- **NC2**, convergence to simplex equiangular tight frame,

$$\|\bar{\mathbf{h}}^{(k)} - \bar{\mathbf{h}}\|_2 - \|\bar{\mathbf{h}}^{(k')} - \bar{\mathbf{h}}\|_2 \rightarrow 0, \quad (26)$$

$$\frac{\langle \bar{\mathbf{h}}^{(k)} - \bar{\mathbf{h}}, \bar{\mathbf{h}}^{(k')} - \bar{\mathbf{h}} \rangle}{\|\bar{\mathbf{h}}^{(k)} - \bar{\mathbf{h}}\|_2 \|\bar{\mathbf{h}}^{(k')} - \bar{\mathbf{h}}\|_2} \rightarrow \begin{cases} 1, & k = k', \\ -\frac{1}{K-1}, & k \neq k'; \end{cases} \quad (27)$$

- **NC3**, convergence to self-duality,

$$\frac{\mathbf{w}_k}{\|\mathbf{w}_k\|_2} - \frac{\bar{\mathbf{h}}^{(k)} - \bar{\mathbf{h}}}{\|\bar{\mathbf{h}}^{(k)} - \bar{\mathbf{h}}\|_2} \rightarrow 0; \quad (28)$$

- **NC4**, simplification to nearest class center,

$$\arg \max_j \{\mathbf{w}_j \mathbf{h} - b_j\}_{j=1}^K \rightarrow \arg \min_j \{\|\mathbf{h} - \bar{\mathbf{h}}^{(j)}\|_2\}_{j=1}^K. \quad (29)$$

In Sec. 4, we applied three metrics,  $\mathcal{NC}_1, \mathcal{NC}_2, \mathcal{NC}_3$ , to measure the above properties, similar to that defined in (Zhu et al., 2021; Zhou et al., 2022):

$$\mathcal{NC}_1 := \frac{1}{K} \text{trace}(\Sigma_W \Sigma_B^\dagger), \quad (30)$$

$$\mathcal{NC}_2 := \left\| \frac{\tilde{\mathbf{W}} \tilde{\mathbf{W}}^T}{\|\tilde{\mathbf{W}} \tilde{\mathbf{W}}^T\|_F} - \frac{1}{\sqrt{K-1}} \left( \mathbf{I}_K - \frac{1}{K} \mathbf{1}_K \mathbf{1}_K^T \right) \right\|_F, \quad (31)$$

$$\mathcal{NC}_3 := \left\| \frac{\mathbf{W} \tilde{\mathbf{H}}}{\|\mathbf{W} \tilde{\mathbf{H}}\|_F} - \frac{1}{\sqrt{K-1}} \left( \mathbf{I}_K - \frac{1}{K} \mathbf{1}_K \mathbf{1}_K^T \right) \right\|_F, \quad (32)$$

where

$$\tilde{\mathbf{W}} = [\mathbf{w}_1 - \bar{\mathbf{w}}, \mathbf{w}_2 - \bar{\mathbf{w}}, \dots, \mathbf{w}_K - \bar{\mathbf{w}}]^T \in \mathbb{R}^{K \times d}, \quad (33)$$

$$\tilde{\mathbf{H}} = [\bar{\mathbf{h}}^{(1)} - \bar{\mathbf{h}}, \bar{\mathbf{h}}^{(2)} - \bar{\mathbf{h}}, \dots, \bar{\mathbf{h}}^{(K)} - \bar{\mathbf{h}}] \in \mathbb{R}^{d \times K}, \quad (34)$$

$$\bar{\mathbf{w}} = \frac{1}{K} \sum_{k=1}^K \mathbf{w}_k. \quad (35)$$

When defining  $\mathcal{NC}_2$ , Zhu et al. (2021) and Zhou et al. (2022) did not subtract the classifier vectors with their mean, i.e., the original  $\mathcal{NC}_2$  is defined as  $\|\frac{\mathbf{W}\mathbf{W}^T}{\|\mathbf{W}\mathbf{W}^T\|_F} - \frac{1}{\sqrt{K-1}}(\mathbf{I}_K - \frac{1}{K}\mathbf{1}_K\mathbf{1}_K^T)\|_F$ , with  $\mathbf{W} = [\mathbf{w}_1, \mathbf{w}_2, \dots, \mathbf{w}_K]^T \in \mathbb{R}^{K \times d}$ .

As mentioned by Zhu et al. (2021) and Zhou et al. (2022), due to the ‘‘ReLU’’ activation functions before the FC classifiers in the deep models, the feature mean  $\tilde{\mathbf{h}}_i = \frac{1}{K} \sum_{k=1}^K \mathbf{h}_i^{(k)}$  will be non-negative, which conflicts with  $\tilde{\mathbf{h}}_i = \mathbf{0}$  required by Theorems 1 and 2. Then, the average features/class centers of  $K$  categories do not directly form an ETF, while the globally-centered average features form ETF, i.e., NC2 properties described by Eqs. (26) and (27). As the proof of Theorems 1 and 2, in the neural collapse, the features of each category will be parallel to its classifier vector, i.e.,  $\mathbf{h}_i^{(k)} = \sqrt{\frac{\lambda \mathbf{W}}{n \lambda_H}} \mathbf{w}_k$  in Eqs (126,127). Therefore, the classifier vectors  $\{\mathbf{w}_k\}$  should also subtract their global mean before form an ETF. In other words, the third NC property should be

$$\mathbf{NC3}' : \frac{\mathbf{w}_k - \bar{\mathbf{w}}}{\|\mathbf{w}_k - \bar{\mathbf{w}}\|_2} - \frac{\bar{\mathbf{h}}^{(k)} - \bar{\mathbf{h}}}{\|\bar{\mathbf{h}}^{(k)} - \bar{\mathbf{h}}\|_2} \rightarrow 0. \quad (36)$$

As our analysis, when a model falling to the neural collapse, its classification accuracy  $\mathcal{A}$  and uniform accuracy  $\mathcal{A}_{\text{Uni}}$  must be 100% on the training dataset.

### S-1.2 FEATURE PROPERTY

In the experiments, we applied four metrics to compare the performance of CE and BCE, i.e., classification accuracy  $\mathcal{A}$ , uniform accuracy  $\mathcal{A}_{\text{Uni}}$ , feature compactness  $\mathcal{E}_{\text{com}}$ , and distinctiveness  $\mathcal{E}_{\text{dis}}$ . These metrics on the training data will be maximized when the model, classifier, and loss in the neural collapse.

In a classification task, suppose a dataset  $\mathcal{D} = \bigcup_{k=1}^K \mathcal{D}_k = \bigcup_{k=1}^K \bigcup_{i=1}^{n_k} \{\mathbf{X}_i^{(k)}\}$  from  $K$  categories, where  $\mathbf{X}_i^{(k)}$  denotes the  $i$ th sample from the category  $k$ . For the sample  $\mathbf{X}_i^{(k)}$  in  $\mathcal{D}$ , a model  $\mathcal{M}$  converts it into its feature  $\mathbf{h}_i^{(k)} = \mathcal{M}(\mathbf{X}_i^{(k)}) \in \mathbb{R}^d$ , where  $d$  is the length of the feature vector. A linear, full connection (FC) classifier  $\mathcal{C} = \{(\mathbf{w}_k, b_k)\}_{k=1}^K$  transform the feature into  $K$  decision scores  $\{\mathbf{w}_j \mathbf{h}_i^{(k)} - b_j\}_{j=1}^K$ . Then, the sample can be correctly classified if

$$\mathbf{w}_k \mathbf{h}_i^{(k)} - b_k = \max \{\mathbf{w}_j \mathbf{h}_i^{(k)} - b_j\}_{j=1}^K, \quad (37)$$

which is equivalent to

$$k = \arg \max_{\ell} \{\mathbf{w}_{\ell}^T \mathbf{h}^{(k)} - b_{\ell}\}. \quad (38)$$

The the commonly used **classification accuracy** can be defined as

$$\mathcal{A}(\mathcal{M}, \mathcal{C}) = \frac{|\mathcal{D}(\mathcal{M}, \mathcal{C})|}{|\mathcal{D}|} \times 100\%, \quad (39)$$

where

$$\mathcal{D}(\mathcal{M}, \mathcal{C}) = \bigcup_{k=1}^K \left\{ \mathbf{X}^{(k)} : k = \arg \max_{\ell} \{\mathbf{w}_{\ell}^T \mathbf{h}^{(k)} - b_{\ell}\}, \mathbf{X}^{(k)} \in \mathcal{D}_k, \mathbf{h}^{(k)} = \mathcal{M}(\mathbf{X}^{(k)}) \right\}, \quad (40)$$

consisting of the all samples correctly classified by  $\mathcal{M}$  and  $\mathcal{C}$  in  $\mathcal{D}$ .

Eq. (37) implies a dynamic threshold  $t_{\mathbf{X}}$  separating the positive and negative decision scores. Inspired by Eq. (17), we define uniform accuracy by using a unified threshold. Firstly, for given dataset  $\mathcal{D}$  and model  $\mathcal{M}$ , classifier  $\mathcal{C}$  with a fixed threshold  $t$ , we denote a subset of  $\mathcal{D}$  as

$$\mathcal{D}(\mathcal{M}, \mathcal{C}; t) = \bigcup_{k=1}^K \left\{ \mathbf{X}^{(k)} \in \mathcal{D}_k : \mathbf{w}_k \mathbf{h}^{(k)} - b_k > t \geq \max \{\mathbf{w}_j^T \mathbf{h}^{(k)} - b_j\}_{\substack{j=1 \\ j \neq k}}^K, \mathbf{h}^{(k)} = \mathcal{M}(\mathbf{X}^{(k)}) \right\} \quad (41)$$

which is the biggest subset of  $\mathcal{D}$  uniformly classified by  $\mathcal{M}$  and  $\mathcal{C}$  with  $t$ . Then the ratio

$$\mathcal{A}_{\text{Uni}}(\mathcal{M}, \mathcal{C}; t) = \frac{|\mathcal{D}(\mathcal{M}, \mathcal{C}; t)|}{|\mathcal{D}|} \times 100\%, \quad (42)$$

is the corresponding uniform accuracy, and the maximum ratio with varying thresholds, i.e.,

$$\mathcal{A}_{\text{Uni}}(\mathcal{M}, \mathcal{C}) = \max_{t \in \mathbb{R}} \mathcal{A}_{\text{Uni}}(\mathcal{M}, \mathcal{C}; t), \quad (43)$$

is defined as the final **uniform accuracy**.

In practice, to calculate the uniform accuracy  $\mathcal{A}_{\text{Uni}}$ , the sets of positive and negative decision scores for the all samples

$$\mathcal{S}_{\text{pos}} = \bigcup_{k=1}^K \{\mathbf{w}_k \mathbf{h}_i^{(k)} - b_k : i = 1, 2, \dots, n_k\}, \quad (44)$$

$$\mathcal{S}_{\text{neg}} = \bigcup_{k=1}^K \bigcup_{\substack{j=1 \\ j \neq k}}^K \{\mathbf{w}_j \mathbf{h}_i^{(k)} - b_j : i = 1, 2, \dots, n_k\} \quad (45)$$

are first computed, and denote

$$s_{\text{pos-min}} = \min(\mathcal{S}_{\text{pos}}) \quad \text{and} \quad s_{\text{neg-max}} = \max(\mathcal{S}_{\text{pos}}). \quad (46)$$

If  $s_{\text{pos-min}} \geq s_{\text{neg-max}}$ , the classification accuracy  $\mathcal{A}$  and the uniform one  $\mathcal{A}_{\text{Uni}}$  must be 100%, otherwise,  $N = 200$  thresholds  $\{t_i\}_{i=1}^N$  are evenly taken from the interval  $[s_{\text{pos-min}}, s_{\text{neg-max}}]$ , and  $N = 200$  uniform accuracy  $\mathcal{A}_{\text{Uni}}(\mathcal{M}, \mathcal{C}; t_i)$  are figured out, while the best one  $\max_{i=1}^N \{\mathcal{A}_{\text{Uni}}(\mathcal{M}, \mathcal{C}; t_i)\}$  is chosen as the final uniform accuracy  $\mathcal{A}_{\text{Uni}}$ . In this calculation, the final results will be slightly different when different numbers ( $N$ ) of thresholds are taken in the score interval.

By Eqs. (17), a model with higher uniform accuracy, it would lead to more samples from category  $k$ ,  $\forall k \in [K]$ , whose inner products (positive similarities/decision scores without bias) with the classifier vector  $\mathbf{w}_k$  are greater than  $b_k + t$ , implying higher intra-class compactness in each category, and requires more samples whose inner products (negative similarities/decision scores without bias) with the classifier vectors of other categories are less than  $b_j + t$ , implying higher inter-class distinctiveness among all categories. For the intra-class **compactness**  $\mathcal{E}_{\text{com}}$  and inter-class **distinctiveness**  $\mathcal{E}_{\text{dis}}$  among sample features, we define them as

$$\mathcal{E}_{\text{com}} = \frac{1}{2} \left[ \frac{1}{K} \sum_{k=1}^K \left( \frac{1}{n_k^2} \sum_{i=1}^{n_k} \sum_{i'=1}^{n_k} \frac{\langle \mathbf{h}_i^{(k)} - \bar{\mathbf{h}}, \mathbf{h}_{i'}^{(k)} - \bar{\mathbf{h}} \rangle}{\|\mathbf{h}_i^{(k)} - \bar{\mathbf{h}}\| \|\mathbf{h}_{i'}^{(k)} - \bar{\mathbf{h}}\|} \right) + 1 \right], \quad (47)$$

$$\mathcal{E}_{\text{dis}} = \frac{1}{2} \left[ 1 - \frac{1}{K(K-1)} \sum_{k=1}^K \sum_{\substack{k'=1 \\ k' \neq k}}^K \left( \frac{1}{n_k} \frac{1}{n_{k'}} \sum_{i=1}^{n_k} \sum_{i'=1}^{n_{k'}} \frac{\langle \mathbf{h}_i^{(k)}, \mathbf{h}_{i'}^{(k')} \rangle}{\|\mathbf{h}_i^{(k)}\| \|\mathbf{h}_{i'}^{(k')}\|} \right) \right], \quad (48)$$

where  $\bar{\mathbf{h}} = \frac{1}{|\mathcal{D}|} \sum_{k=1}^K \sum_{i=1}^{n_k} \mathbf{h}_i^{(k)}$  is the global feature center.

Due to the neural collapse, the compactness  $\mathcal{E}_{\text{com}}$  might be higher than  $\frac{1}{2} - \frac{1}{2(K-1)}$ , and the distinctiveness  $\mathcal{E}_{\text{dis}}$  might be lower than  $\frac{1}{2} + \frac{1}{2(K-1)}$ , for the model  $\mathcal{M}$  and classifier  $\mathcal{C}$  which have been well trained on the dataset  $\mathcal{D}$ .



## S-2 EXPERIMENTAL SETTINGS AND RESULTS

## S-2.1 EXPERIMENTAL SETTINGS

Table S-4: Experimental settings in our experiments.

|                 |                          | Neural collapse                                                 |                    | Classification     |              |                    |              |
|-----------------|--------------------------|-----------------------------------------------------------------|--------------------|--------------------|--------------|--------------------|--------------|
|                 |                          | setting-1                                                       | setting-2          | setting-3          | setting-4    | setting-5          | setting-6    |
| Hyper-parameter | epochs                   | 100                                                             | 100                | 100                | 100          | 100                | 100          |
|                 | optimizer                | SGD                                                             | AdamW              | SGD                | AdamW        | SGD                | AdamW        |
|                 | batch size               | 128                                                             | 128                | 128                | 128          | 128                | 128          |
|                 | learning rate            | 0.01                                                            | 0.001              | 0.01               | 0.001        | 0.01               | 0.001        |
|                 | learning rate decay      | step                                                            | cosine             | step               | cosine       | step               | cosine       |
|                 | weight decay $\lambda$   | $\times$                                                        | $\times$           | $5 \times 10^{-4}$ | 0.05         | $5 \times 10^{-4}$ | 0.05         |
|                 | weight decay $\lambda_W$ | $5 \times 10^{-4}$                                              | $5 \times 10^{-4}$ | $\times$           | $\times$     | $\times$           | $\times$     |
|                 | weight decay $\lambda_H$ | $5 \times 10^{-4}$                                              | $5 \times 10^{-4}$ | $\times$           | $\times$     | $\times$           | $\times$     |
|                 | weight decay $\lambda_b$ | $5 \times 10^{-4}$                                              | $5 \times 10^{-4}$ | $\times$           | $\times$     | $\times$           | $\times$     |
|                 | warmup epochs            | 0                                                               | 0                  | 0                  | 0            | 0                  | 0            |
| Data Aug.       | random cropping          | $\times$                                                        | $\times$           | $\checkmark$       | $\checkmark$ | $\checkmark$       | $\checkmark$ |
|                 | horizontal flipping      | $\times$                                                        | $\times$           | 0.5                | 0.5          | 0.5                | 0.5          |
|                 | label smoothing          | $\times$                                                        | $\times$           | $\times$           | $\times$     | 0.1                | 0.1          |
|                 | mixup alpha              | $\times$                                                        | $\times$           | $\times$           | $\times$     | 0.8                | 0.8          |
|                 | cutmix alpha             | $\times$                                                        | $\times$           | $\times$           | $\times$     | 1.0                | 1.0          |
|                 | mixup prob.              | $\times$                                                        | $\times$           | $\times$           | $\times$     | 0.8                | 0.8          |
|                 | normalization            | mean = [0.4914, 0.4822, 0.4465], std = [0.2023, 0.1994, 0.2010] |                    |                    |              |                    |              |

In Sec. 4, we train ResNet18, ResNet50, and DenseNet121 on MNIST, CIFAR10, and CIFAR100, respectively. Table S-4 shows the experimental settings. In default, we train the models using setting-1 and setting-2 in the experiments of neural collapse, and apply setting-3, setting-4, setting-5, and setting-6 in the experiments of classification.

Table S-5: The numerical results of the three models trained on MNIST, with  $\lambda_W = \lambda_H = \lambda_b = 5 \times 10^{-4}$ .

|                                                    |                                                     | MNIST                |                      |                      |                      |
|----------------------------------------------------|-----------------------------------------------------|----------------------|----------------------|----------------------|----------------------|
|                                                    |                                                     | SGD                  |                      | AdamW                |                      |
|                                                    |                                                     | CE                   | BCE                  | CE                   | BCE                  |
| ResNet18                                           | $\hat{\rho}$                                        | 219.0960             | 407.1362             | 212.2180             | 357.9696             |
|                                                    | $s_{\text{pos}}$                                    | $5.6439 \pm 0.1437$  | $6.4008 \pm 0.1236$  | $5.6331 \pm 0.0120$  | $7.7460 \pm 0.0113$  |
|                                                    | $s_{\text{neg}}$                                    | $-0.6302 \pm 0.2073$ | $-3.4987 \pm 0.1137$ | $-0.6259 \pm 0.0127$ | $-2.1233 \pm 0.0291$ |
|                                                    | $\hat{b}$                                           | $-0.0074 \pm 0.0852$ | $2.2170 \pm 0.0308$  | $0.0001 \pm 0.0328$  | $3.5134 \pm 0.0337$  |
|                                                    | $\alpha(\hat{b})$                                   | —                    | -0.0268              | —                    | -0.0086              |
|                                                    | $\mathcal{A}/\mathcal{A}_{\text{Uni}}$ for training | 100.00/100.00        | 100.00/100.00        | 100.00/100.00        | 100.00/100.00        |
| ResNet50                                           | $\hat{\rho}$                                        | 217.7276             | 396.7711             | 212.2304             | 357.2365             |
|                                                    | $s_{\text{pos}}$                                    | $5.6383 \pm 0.6400$  | $6.5393 \pm 1.6509$  | $5.6389 \pm 0.0380$  | $7.7706 \pm 0.0573$  |
|                                                    | $s_{\text{neg}}$                                    | $-0.6271 \pm 0.5978$ | $-3.2512 \pm 1.9658$ | $-0.6266 \pm 0.0220$ | $-2.1029 \pm 0.0429$ |
|                                                    | $\hat{b}$                                           | $0.0039 \pm 0.0733$  | $2.4674 \pm 0.0492$  | $0.0001 \pm 0.0328$  | $3.5322 \pm 0.0329$  |
|                                                    | $\alpha(\hat{b})$                                   | —                    | -0.0217              | —                    | -0.0084              |
|                                                    | $\mathcal{A}/\mathcal{A}_{\text{Uni}}$ for training | 99.68/99.64          | 99.79/99.76          | 100.00/100.00        | 100.00/100.00        |
| DenseNet121                                        | $\hat{\rho}$                                        | 224.1426             | 414.7491             | 212.2337             | 355.5479             |
|                                                    | $s_{\text{pos}}$                                    | $5.5774 \pm 0.1217$  | $6.1977 \pm 0.0987$  | $5.6318 \pm 0.1132$  | $7.8030 \pm 0.0377$  |
|                                                    | $s_{\text{neg}}$                                    | $-0.6193 \pm 0.1221$ | $-3.6421 \pm 0.1048$ | $-0.6258 \pm 0.3427$ | $-2.0508 \pm 0.0314$ |
|                                                    | $\hat{b}$                                           | $0.0010 \pm 0.0570$  | $2.0705 \pm 0.0264$  | $0.0002 \pm 0.0324$  | $3.5767 \pm 0.0344$  |
|                                                    | $\alpha(\hat{b})$                                   | —                    | -0.0302              | —                    | -0.0081              |
|                                                    | $\mathcal{A}/\mathcal{A}_{\text{Uni}}$ for training | 100.00/99.99         | 100.00/100.00        | 99.63/99.62          | 100.00/100.00        |
| $\mathcal{A}/\mathcal{A}_{\text{Uni}}$ for testing | 99.45/99.40                                         | 99.54/99.52          | 99.29/99.22          | 99.64/99.60          |                      |

## S-2.2 EXPERIMENTAL RESULTS OF NEURAL COLLAPSE

In this section, we show the experimental results of neural collapse. Most of these results are calculated on the training data of the three datasets.

918  
919  
920  
921  
922  
923  
924  
925  
926  
927  
928  
929  
930  
931  
932  
933  
934  
935  
936  
937  
938  
939  
940  
941  
942  
943  
944  
945  
946  
947  
948  
949  
950  
951  
952  
953  
954  
955  
956  
957  
958  
959  
960  
961  
962  
963  
964  
965  
966  
967  
968  
969  
970  
971

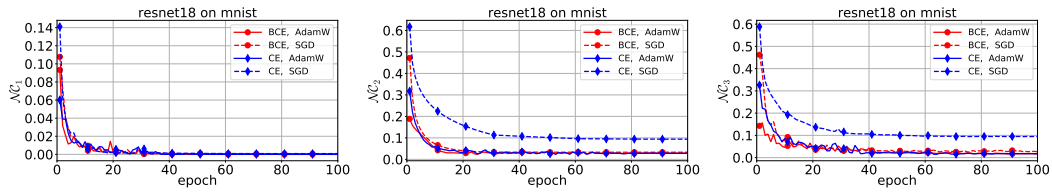(a)  $\mathcal{NC}_1$ ,  $\mathcal{NC}_2$ , and  $\mathcal{NC}_3$  of ResNet18 on MNIST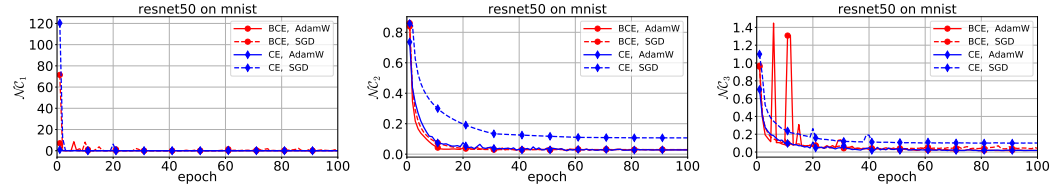(b)  $\mathcal{NC}_1$ ,  $\mathcal{NC}_2$ , and  $\mathcal{NC}_3$  of ResNet50 on MNIST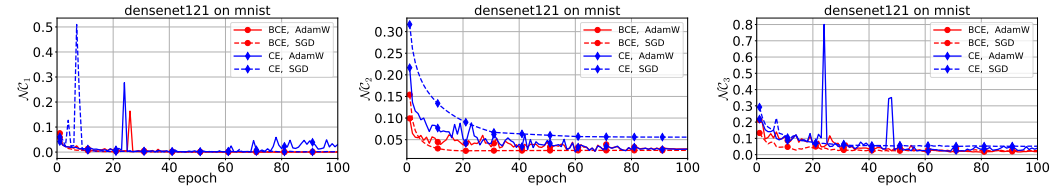(c)  $\mathcal{NC}_1$ ,  $\mathcal{NC}_1$ , and  $\mathcal{NC}_1$  of DenseNet121 on MNIST

Figure S-5: The evolution of the three NC metrics in the training of ResNet18 (top), ResNet50 (middle), DenseNet121 (bottom) on MNIST with CE and BCE using SGD and AdamW, respectively, with  $\lambda_W = \lambda_H = \lambda_b = 5 \times 10^{-4}$ .

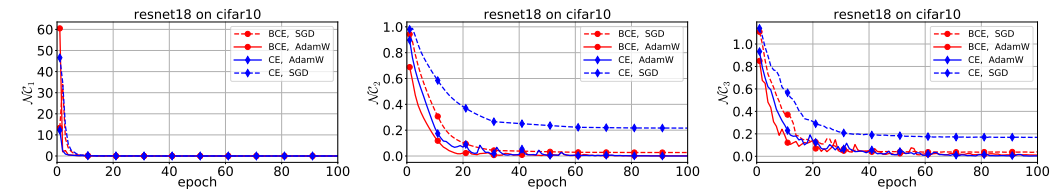(a)  $\mathcal{NC}_1$ ,  $\mathcal{NC}_2$ , and  $\mathcal{NC}_3$  of ResNet18 on CIFAR10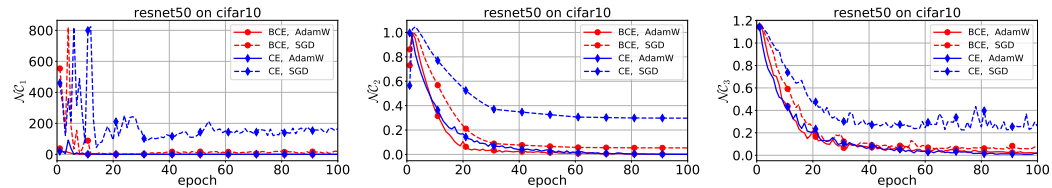(b)  $\mathcal{NC}_1$ ,  $\mathcal{NC}_2$ , and  $\mathcal{NC}_3$  of ResNet50 on CIFAR10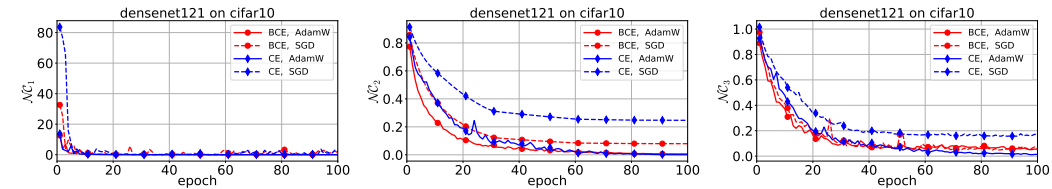(c)  $\mathcal{NC}_1$ ,  $\mathcal{NC}_1$ , and  $\mathcal{NC}_1$  of DenseNet121 on CIFAR10

Figure S-6: The evolution of the three NC metrics in the training of ResNet18 (top), ResNet50 (middle), DenseNet121 (bottom) on CIFAR10 with CE and BCE using SGD and AdamW, respectively, with  $\lambda_W = \lambda_H = \lambda_b = 5 \times 10^{-4}$ .

Table S-6: The numerical results of the three models trained on CIFAR10, with  $\lambda_W = \lambda_H = \lambda_b = 5 \times 10^{-4}$ .

|                                                    |                                                     | CIFAR10               |                      |                      |                      |
|----------------------------------------------------|-----------------------------------------------------|-----------------------|----------------------|----------------------|----------------------|
|                                                    |                                                     | SGD                   |                      | AdamW                |                      |
|                                                    |                                                     | CE                    | BCE                  | CE                   | BCE                  |
| ResNet18                                           | $\hat{\rho}$                                        | 221.7685              | 395.3918             | 212.4173             | 366.6813             |
|                                                    | $s_{\text{pos}}$                                    | $5.7103 \pm 0.2252$   | $6.5627 \pm 0.2042$  | $5.6393 \pm 0.0568$  | $7.5025 \pm 0.0549$  |
|                                                    | $s_{\text{neg}}$                                    | $-0.6386 \pm 0.3574$  | $-3.4557 \pm 0.1939$ | $-0.6265 \pm 0.0066$ | $-2.3582 \pm 0.0225$ |
|                                                    | $\hat{b}$                                           | $-0.0085 \pm 0.0430$  | $2.2618 \pm 0.0678$  | $-0.0001 \pm 0.0038$ | $3.2905 \pm 0.0080$  |
|                                                    | $\alpha(\hat{b})$                                   | —                     | -0.0266              | —                    | -0.0105              |
|                                                    | $\mathcal{A}/\mathcal{A}_{\text{Uni}}$ for training | 99.99/99.98           | 100.00/100.00        | 100.00/100.00        | 100.00/100.00        |
| ResNet50                                           | $\hat{\rho}$                                        | 220.8594              | 382.4440             | 212.3374             | 369.2447             |
|                                                    | $s_{\text{pos}}$                                    | $5.7365 \pm 8.2056$   | $6.5614 \pm 4.3923$  | $5.6386 \pm 0.1062$  | $7.4351 \pm 0.2787$  |
|                                                    | $s_{\text{neg}}$                                    | $-0.6439 \pm 14.1340$ | $-3.5695 \pm 7.0134$ | $-0.6266 \pm 0.0150$ | $-2.4493 \pm 0.2165$ |
|                                                    | $\hat{b}$                                           | $0.0045 \pm 0.1430$   | $2.4002 \pm 0.1496$  | $-0.0000 \pm 0.0053$ | $3.2051 \pm 0.0309$  |
|                                                    | $\alpha(\hat{b})$                                   | —                     | -0.0242              | —                    | -0.0114              |
|                                                    | $\mathcal{A}/\mathcal{A}_{\text{Uni}}$ for training | 99.61/99.52           | 99.65/99.32          | 99.99/99.99          | 100.00/100.00        |
| DenseNet121                                        | $\hat{\rho}$                                        | 225.0609              | 392.8198             | 212.7966             | 360.5613             |
|                                                    | $s_{\text{pos}}$                                    | $5.7225 \pm 1.7228$   | $6.2376 \pm 0.8437$  | $5.6150 \pm 0.2851$  | $7.6743 \pm 0.1239$  |
|                                                    | $s_{\text{neg}}$                                    | $-0.6348 \pm 0.8664$  | $-3.6171 \pm 1.6284$ | $-0.6240 \pm 0.0330$ | $-2.1715 \pm 0.0604$ |
|                                                    | $\hat{b}$                                           | $0.0012 \pm 0.0364$   | $2.0875 \pm 0.1229$  | $0.0003 \pm 0.0061$  | $3.4612 \pm 0.0203$  |
|                                                    | $\alpha(\hat{b})$                                   | —                     | -0.0318              | —                    | -0.0090              |
|                                                    | $\mathcal{A}/\mathcal{A}_{\text{Uni}}$ for training | 99.40/99.03           | 99.72/99.62          | 99.87/99.86          | 100.00/100.00        |
| $\mathcal{A}/\mathcal{A}_{\text{Uni}}$ for testing |                                                     | 77.30/74.41           | 79.16/77.95          | 81.54/80.15          | 82.34/81.70          |

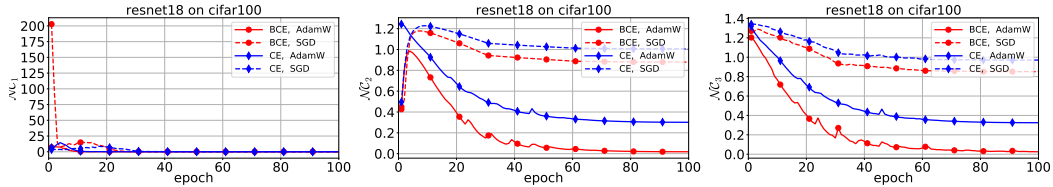(a)  $\mathcal{NC}_1$ ,  $\mathcal{NC}_2$ , and  $\mathcal{NC}_3$  of ResNet18 on CIFAR100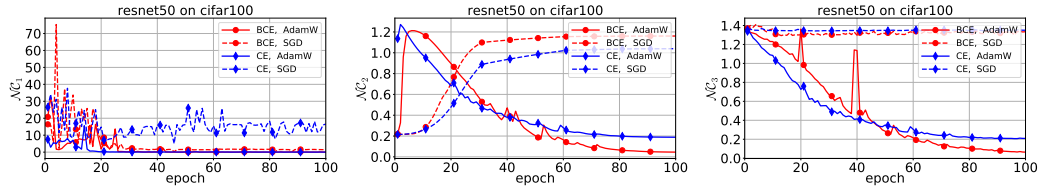(b)  $\mathcal{NC}_1$ ,  $\mathcal{NC}_2$ , and  $\mathcal{NC}_3$  of ResNet50 on CIFAR100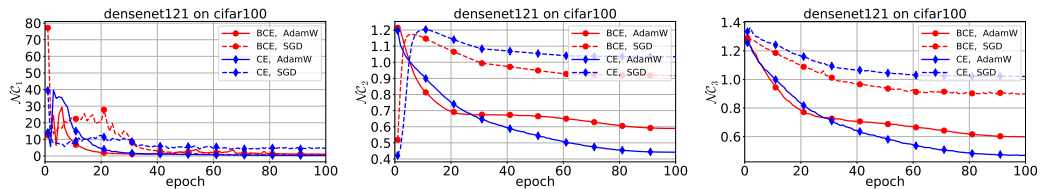(c)  $\mathcal{NC}_1$ ,  $\mathcal{NC}_2$ , and  $\mathcal{NC}_3$  of DenseNet121 on CIFAR100Figure S-7: The evolution of the three NC metrics in the training of ResNet18 (top), ResNet50 (middle), DenseNet121 (bottom) on CIFAR100 with CE and BCE using SGD and AdamW, respectively, with  $\lambda_W = \lambda_H = \lambda_b = 5 \times 10^{-4}$ .

Table S-7: The numerical results of the three models trained on CIFAR100, with  $\lambda_W = \lambda_H = \lambda_b = 5 \times 10^{-4}$ .

|             |                                                     | CIFAR100             |                       |                      |                      |
|-------------|-----------------------------------------------------|----------------------|-----------------------|----------------------|----------------------|
|             |                                                     | SGD                  |                       | AdamW                |                      |
|             |                                                     | CE                   | BCE                   | CE                   | BCE                  |
| ResNet18    | $\hat{\rho}$                                        | 954.3918             | 1732.6035             | 846.4734             | 1708.9231            |
|             | $s_{\text{pos}}$                                    | $8.3613 \pm 0.4316$  | $3.5152 \pm 0.2392$   | $7.5183 \pm 0.0997$  | $4.0202 \pm 0.0696$  |
|             | $s_{\text{neg}}$                                    | $-0.0848 \pm 1.3897$ | $-6.5934 \pm 1.2718$  | $-0.0754 \pm 0.2580$ | $-5.6834 \pm 0.0438$ |
|             | $\hat{b}$                                           | $0.0004 \pm 0.2356$  | $0.8407 \pm 0.0678$   | $0.0005 \pm 0.0097$  | $1.1317 \pm 0.0007$  |
|             | $\alpha(\hat{b})$                                   | —                    | -0.2672               | —                    | -0.2147              |
|             | $\mathcal{A}/\mathcal{A}_{\text{Uni}}$ for training | 99.95/99.81          | 99.98/99.97           | 99.98/99.96          | 99.98/99.97          |
|             | $\mathcal{A}/\mathcal{A}_{\text{Uni}}$ for testing  | 34.61/17.99          | 42.06/30.61           | 56.58/47.29          | 60.48/43.04          |
| ResNet50    | $\hat{\rho}$                                        | 36.2794              | 289.5987              | 838.0098             | 1710.3754            |
|             | $s_{\text{pos}}$                                    | $0.5404 \pm 9.8551$  | $-4.6656 \pm 16.0695$ | $7.3906 \pm 0.3560$  | $3.9356 \pm 1.5798$  |
|             | $s_{\text{neg}}$                                    | $0.6182 \pm 11.4828$ | $-6.2663 \pm 29.8421$ | $-0.0745 \pm 0.1935$ | $-5.7441 \pm 1.1971$ |
|             | $\hat{b}$                                           | $0.0006 \pm 0.0592$  | $0.3210 \pm 0.0241$   | $0.0005 \pm 0.0073$  | $1.1239 \pm 0.0044$  |
|             | $\alpha(\hat{b})$                                   | —                    | -0.4090               | —                    | -0.2160              |
|             | $\mathcal{A}/\mathcal{A}_{\text{Uni}}$ for training | 2.52/0.05            | 7.67/0.44             | 99.83/99.76          | 99.77/99.62          |
|             | $\mathcal{A}/\mathcal{A}_{\text{Uni}}$ for testing  | 2.48/0.06            | 7.16/0.39             | 55.51/50.77          | 53.55/49.18          |
| DenseNet121 | $\hat{\rho}$                                        | 894.4895             | 1597.8596             | 900.5263             | 1761.0126            |
|             | $s_{\text{pos}}$                                    | $8.4473 \pm 0.8321$  | $3.0569 \pm 1.6496$   | $8.1030 \pm 0.4805$  | $4.0875 \pm 0.2246$  |
|             | $s_{\text{neg}}$                                    | $-0.0842 \pm 1.6340$ | $-6.6552 \pm 2.6035$  | $-0.0800 \pm 0.4365$ | $-5.8613 \pm 0.7152$ |
|             | $\hat{b}$                                           | $-0.0012 \pm 0.2239$ | $0.8313 \pm 0.0983$   | $0.0016 \pm 0.0948$  | $1.1306 \pm 0.0145$  |
|             | $\alpha(\hat{b})$                                   | —                    | -0.2714               | —                    | -0.2141              |
|             | $\mathcal{A}/\mathcal{A}_{\text{Uni}}$ for training | 99.15/94.38          | 99.38/99.23           | 99.80/99.78          | 99.98/99.97          |
|             | $\mathcal{A}/\mathcal{A}_{\text{Uni}}$ for testing  | 37.48/24.20          | 39.93/35.19           | 50.31/37.87          | 52.41/49.81          |

**NC metrics, the final classifier bias, and the final decision scores.** Figs. S-5 - S-7 shows the evolution of the three NC metrics in the training of ResNet18, ResNet50, DenseNet121 on MNIST, CIFAR10, and CIFAR100 with CE and BCE. In the training on MNIST and CIFAR10, the NC metrics of both CE and BCE approach zero at the terminal phase of training, and that of BCE decrease faster than that of CE at the first 20 epochs. In the training on CIFAR100, which is a more challenging dataset than MNIST and CIFAR10, the NC metrics of models trained by SGD do not decrease to zero, while that of models trained by AdamW approach zero, and the NC metrics of BCE decrease faster than that of CE in most cases. Table S-5 - S-7 present the numerical results of the final models at the 100th epoch. In these tables,  $\hat{\rho} = \|\hat{\mathbf{W}}\|_F^2$ , where  $\hat{\mathbf{W}} = [\hat{w}_1, \hat{w}_2, \dots, \hat{w}_K]^T \in \mathbb{R}^{K \times d}$  is the final trained classifier weight; “ $s_{\text{pos}}$ ” rows list the mean and standard deviations of the final positive decision scores without biases, i.e.,

$$\text{Mean}(s_{\text{pos}}) = \frac{1}{nK} \sum_{k=1}^K \sum_{i=1}^n \hat{w}_k \mathbf{h}_i^{(k)}, \quad (49)$$

$$\text{Std}(s_{\text{pos}}) = \sqrt{\frac{\sum_{k=1}^K \sum_{i=1}^n (\hat{w}_k \mathbf{h}_i^{(k)} - \text{Mean}(s_{\text{pos}}))^2}{nK}}, \quad (50)$$

“ $s_{\text{neg}}$ ” rows list that of the final negative decision scores without biases, i.e.,

$$\text{Mean}(s_{\text{neg}}) = \frac{1}{nK(K-1)} \sum_{k=1}^K \sum_{\substack{j=1 \\ j \neq k}}^K \sum_{i=1}^n \hat{w}_j \mathbf{h}_i^{(k)}, \quad (51)$$

$$\text{Std}(s_{\text{neg}}) = \sqrt{\frac{\sum_{k=1}^K \sum_{\substack{j=1 \\ j \neq k}}^K \sum_{i=1}^n (\hat{w}_j \mathbf{h}_i^{(k)} - \text{Mean}(s_{\text{neg}}))^2}{nK(K-1)}}, \quad (52)$$

and “ $\hat{b}$ ” rows list that of the final classifier bias  $\hat{b} = [\hat{b}_1, \hat{b}_2, \dots, \hat{b}_K]^T \in \mathbb{R}^K$ , i.e.,

$$\text{Mean}(\hat{b}) = \frac{1}{K} \sum_{k=1}^K \hat{b}_k, \quad (53)$$

$$\text{Std}(\hat{b}) = \sqrt{\frac{\sum_{k=1}^K (\hat{b}_k - \text{Mean}(\hat{b}))^2}{K}}. \quad (54)$$

“ $\alpha(\hat{b})$ ” rows list the value of function  $\alpha(b)$  at point  $\text{Mean}(\hat{b})$ , where

$$\alpha(b) = -\frac{K-1}{K \left(1 + \exp\left(b + \sqrt{\frac{\lambda_W}{n\lambda_H}} \frac{\rho}{K(K-1)}\right)\right)} + \frac{1}{K \left(1 + \exp\left(\sqrt{\frac{\lambda_W}{n\lambda_H}} \frac{\rho}{K} - b\right)\right)} + \lambda_b b, \quad (55)$$

is the function at the RHS of Eq. (12).

Besides the classification accuracy  $\mathcal{A}$  and uniform accuracy  $\mathcal{A}_{\text{Uni}}$  of the final models on the training data, Tables S-5, S-6, and S-7 have also presented that on the testing data.

Table S-8: The numerical results of ResNet18 trained on MNIST with fixed weight decay  $\lambda_b$  for the classifier bias.

| Loss  | Opt. | $\bar{b}$ | $\hat{\rho}$ | $s_{\text{pos}}$ | $s_{\text{neg}}$ | $\hat{b}$        | $\alpha(\hat{b})$ |                 |
|-------|------|-----------|--------------|------------------|------------------|------------------|-------------------|-----------------|
| CE    | SGD  | 0         | 218.9428     | 5.6648 ± 0.1673  | -0.6323 ± 0.2360 | -0.0179 ± 0.1228 | —                 |                 |
|       |      | 1         | 218.8023     | 5.6337 ± 0.1473  | -0.6290 ± 0.2097 | 0.9821 ± 0.1149  | —                 |                 |
|       |      | 2         | 218.3450     | 5.6456 ± 0.1556  | -0.6318 ± 0.2213 | 1.9821 ± 0.1122  | —                 |                 |
|       |      | 3         | 218.3319     | 5.6399 ± 0.1521  | -0.6295 ± 0.2132 | 2.9821 ± 0.1163  | —                 |                 |
|       |      | 4         | 219.2994     | 5.6628 ± 0.1600  | -0.6321 ± 0.2281 | 3.9820 ± 0.1307  | —                 |                 |
|       |      | 5         | 219.5797     | 5.6611 ± 0.1780  | -0.6329 ± 0.2411 | 4.9820 ± 0.1279  | —                 |                 |
|       |      | 6         | 220.0522     | 5.6458 ± 0.1598  | -0.6301 ± 0.2245 | 5.9820 ± 0.1312  | —                 |                 |
|       |      | 8         | 219.4256     | 5.6410 ± 0.1608  | -0.6311 ± 0.2284 | 7.9821 ± 0.1194  | —                 |                 |
|       |      | 10        | 219.2911     | 5.6411 ± 0.1601  | -0.6300 ± 0.2152 | 9.9821 ± 0.1250  | —                 |                 |
|       |      | AdamW     | 0            | 212.2146         | 5.6360 ± 0.0250  | -0.6262 ± 0.0189 | -0.0180 ± 0.0486  | —               |
|       | 1    |           | 212.2138     | 5.6355 ± 0.0353  | -0.6262 ± 0.0194 | 0.9828 ± 0.0493  | —                 |                 |
|       | 2    |           | 212.2151     | 5.6336 ± 0.0258  | -0.6260 ± 0.0189 | 1.9821 ± 0.0487  | —                 |                 |
|       | 3    |           | 212.2152     | 5.6336 ± 0.0264  | -0.6260 ± 0.0189 | 2.9825 ± 0.0486  | —                 |                 |
|       | 4    |           | 212.2161     | 5.6307 ± 0.0274  | -0.6257 ± 0.0191 | 3.9823 ± 0.0491  | —                 |                 |
|       | 5    |           | 212.2143     | 5.6308 ± 0.0264  | -0.6257 ± 0.0189 | 4.9809 ± 0.0486  | —                 |                 |
|       | 6    |           | 212.2143     | 5.6323 ± 0.0264  | -0.6258 ± 0.0189 | 5.9822 ± 0.0486  | —                 |                 |
|       | 8    |           | 212.2163     | 5.6347 ± 0.0262  | -0.6261 ± 0.0189 | 7.9812 ± 0.0486  | —                 |                 |
|       | 10   |           | 212.2151     | 5.6340 ± 0.0263  | -0.6260 ± 0.0189 | 9.9829 ± 0.0486  | —                 |                 |
|       | BCE  |           | SGD          | 0                | 393.2500         | 7.1748 ± 0.1277  | -2.8219 ± 0.1379  | 3.0789 ± 0.0489 |
|       |      | 1         |              | 374.9337         | 7.7515 ± 0.1578  | -2.2877 ± 0.1468 | 3.6658 ± 0.0709   | -0.0070         |
| 2     |      | 362.5949  |              | 8.1822 ± 0.1525  | -1.9121 ± 0.1604 | 4.1078 ± 0.1053  | -0.0045           |                 |
| 3     |      | 355.2978  |              | 8.5608 ± 0.1634  | -1.6192 ± 0.1568 | 4.4557 ± 0.0981  | -0.0030           |                 |
| 4     |      | 354.6479  |              | 8.8711 ± 0.1473  | -1.3347 ± 0.1725 | 4.7949 ± 0.1094  | -0.0019           |                 |
| 5     |      | 355.9634  |              | 9.2305 ± 0.1503  | -1.0452 ± 0.1960 | 5.1493 ± 0.1192  | -0.0009           |                 |
| 6     |      | 361.1938  |              | 9.5688 ± 0.1355  | -0.7519 ± 0.1688 | 5.5084 ± 0.0869  | -0.0002           |                 |
| 8     |      | 385.6802  |              | 10.3761 ± 0.1400 | -0.0997 ± 0.2436 | 6.3418 ± 0.0989  | 0.0007            |                 |
| 10    |      | 426.3013  |              | 11.5173 ± 0.1430 | 0.7786 ± 0.3075  | 7.4858 ± 0.1021  | 0.0010            |                 |
| AdamW |      | 0         |              | 350.4272         | 9.3081 ± 0.0352  | -1.0348 ± 0.0321 | 5.2388 ± 0.0609   | -0.0006         |
|       |      | 1         | 350.4283     | 9.3015 ± 0.0345  | -1.0340 ± 0.0321 | 5.2389 ± 0.0609  | -0.0006           |                 |
|       |      | 2         | 350.4292     | 9.3029 ± 0.0357  | -1.0342 ± 0.0321 | 5.2388 ± 0.0609  | -0.0006           |                 |
|       |      | 3         | 350.4275     | 9.3028 ± 0.0364  | -1.0342 ± 0.0321 | 5.2388 ± 0.0609  | -0.0006           |                 |
|       |      | 4         | 350.4248     | 9.3039 ± 0.0362  | -1.0343 ± 0.0320 | 5.2388 ± 0.0609  | -0.0006           |                 |
|       |      | 5         | 350.4250     | 9.3100 ± 0.0358  | -1.0350 ± 0.0320 | 5.2388 ± 0.0608  | -0.0006           |                 |
|       |      | 6         | 350.4302     | 9.3063 ± 0.0345  | -1.0346 ± 0.0321 | 5.2388 ± 0.0608  | -0.0006           |                 |
|       |      | 8         | 350.4304     | 9.3094 ± 0.0356  | -1.0349 ± 0.0321 | 5.2389 ± 0.0609  | -0.0006           |                 |
|       |      | 10        | 350.4330     | 9.3109 ± 0.0369  | -1.0351 ± 0.0321 | 5.2388 ± 0.0609  | -0.0006           |                 |

**The failures in the experiments of neural collapse.** According to the above figures and tables, one can find the models trained with SGD are easily to fail in the experiments of neural collapse, including the ResNet50 trained on MNIST, ResNet50 and DenseNet121 trained on CIFAR10, and the three models trained CIFAR100. The standard deviations of positive/negative decision scores produced by these models are usually larger than 0.5. These failed models in the neural collapse can be roughly classified into two types:

- The two ResNet50 trained on CIFAR100 with SGD. They are completely failed models. The standard deviations of the decision scores are very high, even more than 20, and, for the

BCE-trained model, the means of the positive and negative decision scores are relatively close, while for the CE-trained model, the mean of positive scores is even less than that of negative ones, indicating that most of the samples were not correctly classified. The classification accuracy  $\mathcal{A}$  on the training dataset are only 2.52% and 7.67% with CE and BCE.

- The other failed models trained with SGD, including the ResNet50 trained on MNIST and CIFAR10, DenseNet121 trained on CIFAR10, ResNet18 and DenseNet121 trained on CIFAR100. These models have achieved almost 100% classification accuracy and uniform accuracy on the training dataset. However, according to the standard deviations of decision scores and the NC metrics, we conclude that they do not reach the state of neural collapse.

These failures in the experiments of neural collapse reveal more relationships among classification and neural collapse. In the training, zero classification error appears before zero uniform classification error, which appears before the neural collapse, or, in contrary, the model reaching the neural collapse has the uniform accuracy of 100%, and the model with the uniform accuracy of 100% has also the accuracy 100% on the classification. Both the reverses are not true.

Table S-9: The numerical results of ResNet18 trained on MNIST with varying weight decay  $\lambda_b$  for the classifier bias.

| Loss | Opt.  | $\lambda_b$        | $\hat{\rho}$ | $s_{\text{pos}}$     | $s_{\text{neg}}$     | $\hat{b}$            | $\alpha(\hat{b})$ |
|------|-------|--------------------|--------------|----------------------|----------------------|----------------------|-------------------|
| CE   | SGD   | $5 \times 10^{-1}$ | 218.6677     | $5.6511 \pm 0.1144$  | $-0.6304 \pm 0.1854$ | $-0.0000 \pm 0.0002$ | —                 |
|      |       | $5 \times 10^{-2}$ | 218.6658     | $5.6662 \pm 0.1176$  | $-0.6321 \pm 0.2031$ | $-0.0000 \pm 0.0017$ | —                 |
|      |       | $5 \times 10^{-3}$ | 218.5622     | $5.6427 \pm 0.1076$  | $-0.6296 \pm 0.1917$ | $0.0013 \pm 0.0156$  | —                 |
|      |       | $5 \times 10^{-4}$ | 219.4882     | $5.6527 \pm 0.1287$  | $-0.6322 \pm 0.2352$ | $4.0998 \pm 0.0796$  | —                 |
|      |       | $5 \times 10^{-5}$ | 219.0555     | $5.6526 \pm 0.1407$  | $-0.6310 \pm 0.2192$ | $9.1337 \pm 0.1038$  | —                 |
|      |       | $5 \times 10^{-6}$ | 219.2227     | $5.6426 \pm 0.1507$  | $-0.6307 \pm 0.2209$ | $9.8940 \pm 0.1111$  | —                 |
|      | AdamW | $5 \times 10^{-1}$ | 212.2359     | $5.6329 \pm 0.0340$  | $-0.6259 \pm 0.0037$ | $-0.0000 \pm 0.0001$ | —                 |
|      |       | $5 \times 10^{-2}$ | 212.2369     | $5.6372 \pm 0.0335$  | $-0.6264 \pm 0.0037$ | $0.0000 \pm 0.0010$  | —                 |
|      |       | $5 \times 10^{-3}$ | 212.2328     | $5.6382 \pm 0.0186$  | $-0.6265 \pm 0.0038$ | $0.0000 \pm 0.0083$  | —                 |
|      |       | $5 \times 10^{-4}$ | 212.2152     | $5.6339 \pm 0.0257$  | $-0.6260 \pm 0.0128$ | $0.0010 \pm 0.0324$  | —                 |
|      |       | $5 \times 10^{-5}$ | 212.2158     | $5.6316 \pm 0.0221$  | $-0.6257 \pm 0.0174$ | $3.4803 \pm 0.0448$  | —                 |
|      |       | $5 \times 10^{-6}$ | 212.2147     | $5.6330 \pm 0.0256$  | $-0.6259 \pm 0.0186$ | $8.9169 \pm 0.0480$  | —                 |
| BCE  | SGD   | $5 \times 10^{-1}$ | 472.0906     | $4.2473 \pm 0.1306$  | $-5.6495 \pm 0.1260$ | $0.0036 \pm 0.0000$  | -0.1683           |
|      |       | $5 \times 10^{-2}$ | 471.6918     | $4.2916 \pm 0.1134$  | $-5.5975 \pm 0.1029$ | $0.0362 \pm 0.0003$  | -0.1640           |
|      |       | $5 \times 10^{-3}$ | 452.0422     | $4.6706 \pm 0.1199$  | $-5.1987 \pm 0.0936$ | $0.4031 \pm 0.0037$  | -0.1269           |
|      |       | $5 \times 10^{-4}$ | 358.9137     | $9.0244 \pm 0.1190$  | $-0.7897 \pm 0.1281$ | $4.8403 \pm 0.0604$  | -0.0018           |
|      |       | $5 \times 10^{-5}$ | 414.4364     | $11.0715 \pm 0.1306$ | $0.5388 \pm 0.2787$  | $7.0401 \pm 0.0959$  | 0.0008            |
|      |       | $5 \times 10^{-6}$ | 424.8451     | $11.4847 \pm 0.1327$ | $0.7536 \pm 0.3067$  | $7.4372 \pm 0.0973$  | 0.0010            |
|      | AdamW | $5 \times 10^{-1}$ | 483.3321     | $4.2399 \pm 0.0308$  | $-5.6315 \pm 0.0215$ | $0.0036 \pm 0.0000$  | -0.1636           |
|      |       | $5 \times 10^{-2}$ | 482.1844     | $4.2698 \pm 0.0306$  | $-5.5977 \pm 0.0213$ | $0.0358 \pm 0.0003$  | -0.1598           |
|      |       | $5 \times 10^{-3}$ | 470.6640     | $4.5928 \pm 0.0281$  | $-5.2753 \pm 0.0201$ | $0.3577 \pm 0.0033$  | -0.1256           |
|      |       | $5 \times 10^{-4}$ | 356.5036     | $7.7870 \pm 0.0130$  | $-2.0822 \pm 0.0285$ | $3.5514 \pm 0.0330$  | -0.0083           |
|      |       | $5 \times 10^{-5}$ | 347.1199     | $9.0726 \pm 0.0303$  | $-1.1593 \pm 0.0304$ | $4.9903 \pm 0.0537$  | -0.0012           |
|      |       | $5 \times 10^{-6}$ | 350.0225     | $9.2915 \pm 0.0372$  | $-1.0489 \pm 0.0319$ | $5.2119 \pm 0.0599$  | -0.0006           |

**The bias decay parameter  $\lambda_b$ .** In Sec. 4, we conducted experiments with fixed  $\lambda_b = 0$  and varying  $\lambda_b = 0.5, 0.05, 5 \times 10^{-3}, 5 \times 10^{-4}, 5 \times 10^{-5}, 5 \times 10^{-6}$  to further compare CE and BCE in neural collapse. Fig. 3 have visually shown the results, and we here present the numerical results in Tables S-8 and S-9. In our experiments, the classifier weight  $\mathbf{W}$  and bias  $\mathbf{b}$  are initialized using “kaiming uniform”, i.e., He initialization (He et al., 2015). The initialized classifier bias is with zero-mean, i.e.,  $\frac{1}{K} \sum_{k=1}^K b_k \approx 0$ , and we add them with 0, 1, 2, 3, 4, 5, 6, 8, 10, respectively, to adjust their average value in the experiments with fixed  $\lambda_b$ .

**The batch size.** In the proof of Theorem 1 and 2, it applied the feature matrix  $\mathbf{H}$  including the features of all samples, to explore the the lower bounds for the CE and BCE losses, i.e.,

$$\mathbf{H} = [h_1^{(1)}, h_2^{(1)}, \dots, h_n^{(1)}, h_1^{(2)}, h_2^{(2)}, \dots, h_n^{(2)}, \dots, h_1^{(K)}, h_2^{(K)}, \dots, h_n^{(K)}]. \quad (56)$$

However, batch algorithm was applied in the practical training of deep models, and the batch size would affect the experimental numerical results. To verify this conclusion, a group of experiments

were conducted with varying batch size. We trained ResNet18 on MNIST using SGD and AdamW using setting-1 and setting-2, while the initial learning rates were adjusted according to the batch size,  $0.01 \times \frac{\text{batch size}}{128}$  for SGD and  $0.001 \times \frac{\text{batch size}}{128}$  for AdamW. Fig. S-8 visually shows the distributions of the final classifier bias and the positive/negative decision scores, and Table S-10 lists the final numerical results. From these results, one can find that the bias results still conform to our analysis when batch size  $\leq 1024$ , i.e., the classifier bias converges to zero in the training with CE loss and  $\lambda_b > 0$ , and the classifier bias separates the positive and negative decision scores in the training with BCE loss.

Table S-10: The numerical results of ResNet18 trained on MNIST with varying batch size and  $\lambda_W = \lambda_H = \lambda_b = 5 \times 10^{-4}$ .

| Loss | Opt.      | batch size      | $\hat{\rho}$     | $s_{\text{pos}}$ | $s_{\text{neg}}$ | $\hat{b}$        | $\alpha(\hat{b})$ |
|------|-----------|-----------------|------------------|------------------|------------------|------------------|-------------------|
| CE   | SGD       | 16              | 100.9731         | 6.7176 ± 0.3270  | -0.7538 ± 0.1950 | -0.0074 ± 0.0523 | —                 |
|      |           | 32              | 130.1404         | 6.3375 ± 0.2425  | -0.7110 ± 0.1709 | -0.0074 ± 0.0478 | —                 |
|      |           | 64              | 168.6290         | 6.0159 ± 0.1562  | -0.6737 ± 0.2052 | -0.0074 ± 0.0547 | —                 |
|      |           | 128             | 219.0960         | 5.6439 ± 0.1437  | -0.6302 ± 0.2073 | -0.0074 ± 0.0852 | —                 |
|      |           | 256             | 285.6314         | 5.3200 ± 0.1586  | -0.5936 ± 0.2070 | -0.0074 ± 0.1259 | —                 |
|      |           | 512             | 379.3403         | 4.9776 ± 0.2735  | -0.5535 ± 0.2921 | -0.0073 ± 0.2526 | —                 |
|      |           | 1024            | 522.5523         | 4.6562 ± 1.3926  | -0.5173 ± 0.8343 | -0.0073 ± 1.0641 | —                 |
|      | 2048      | 473.7898        | 3.5759 ± 2.6771  | -0.3972 ± 2.0373 | -0.0072 ± 1.8399 | —                |                   |
|      | AdamW     | 16              | 87.6451          | 6.5511 ± 0.0110  | -0.7279 ± 0.0089 | 0.0003 ± 0.0211  | —                 |
|      |           | 32              | 118.0328         | 6.2558 ± 0.0101  | -0.6951 ± 0.0104 | 0.0003 ± 0.0253  | —                 |
|      |           | 64              | 158.4980         | 5.9506 ± 0.0106  | -0.6612 ± 0.0117 | 0.0002 ± 0.0293  | —                 |
|      |           | 128             | 212.2180         | 5.6331 ± 0.0120  | -0.6259 ± 0.0127 | 0.0001 ± 0.0328  | —                 |
|      |           | 256             | 282.9370         | 5.3168 ± 0.0148  | -0.5908 ± 0.0133 | 0.0000 ± 0.0357  | —                 |
|      |           | 512             | 375.4274         | 4.9968 ± 0.0209  | -0.5552 ± 0.0140 | -0.0001 ± 0.0380 | —                 |
| 1024 |           | 496.6912        | 4.6627 ± 0.0631  | -0.5199 ± 0.0238 | -0.0190 ± 0.0472 | —                |                   |
| 2048 | 668.3063  | 4.3236 ± 0.3703 | -0.4906 ± 0.2909 | -0.0153 ± 0.2964 | —                |                  |                   |
| BCE  | SGD       | 16              | 199.6890         | 6.1841 ± 0.3002  | -5.9379 ± 0.2665 | 0.7828 ± 0.0223  | -0.0660           |
|      |           | 32              | 255.9898         | 6.1508 ± 0.2184  | -5.2761 ± 0.1932 | 1.1506 ± 0.0214  | -0.0546           |
|      |           | 64              | 324.7408         | 6.2846 ± 0.1600  | -4.4319 ± 0.1295 | 1.6456 ± 0.0254  | -0.0399           |
|      |           | 128             | 407.1362         | 6.4008 ± 0.1236  | -3.4987 ± 0.1137 | 2.2170 ± 0.0308  | -0.0268           |
|      |           | 256             | 501.1286         | 6.6422 ± 0.1347  | -2.5493 ± 0.1501 | 2.8605 ± 0.0740  | -0.0167           |
|      |           | 512             | 631.7796         | 6.6413 ± 0.2725  | -1.9155 ± 0.2544 | 3.2338 ± 0.1859  | -0.0127           |
|      |           | 1024            | 816.6544         | 6.3274 ± 0.4653  | -1.5393 ± 0.4515 | 3.3466 ± 0.3554  | -0.0119           |
|      | 2048      | 351.9647        | 1.7449 ± 2.4487  | -0.5243 ± 1.6982 | 2.6332 ± 1.5391  | 0.0077           |                   |
|      | AdamW     | 16              | 189.2794         | 6.5169 ± 0.0240  | -5.3841 ± 0.0215 | 1.2651 ± 0.0119  | -0.0457           |
|      |           | 32              | 242.1592         | 6.7110 ± 0.0169  | -4.5302 ± 0.0202 | 1.7885 ± 0.0167  | -0.0322           |
|      |           | 64              | 300.8807         | 7.1079 ± 0.0118  | -3.4518 ± 0.0229 | 2.5261 ± 0.0234  | -0.0188           |
|      |           | 128             | 357.9696         | 7.7460 ± 0.0113  | -2.1233 ± 0.0291 | 3.5134 ± 0.0337  | -0.0086           |
|      |           | 256             | 455.2137         | 7.6247 ± 0.0112  | -1.6013 ± 0.0256 | 3.8010 ± 0.0325  | -0.0068           |
|      |           | 512             | 590.9918         | 7.2831 ± 0.0271  | -1.3210 ± 0.0270 | 3.8500 ± 0.0375  | -0.0064           |
| 1024 |           | 790.8874        | 6.6204 ± 0.1011  | -1.3148 ± 0.1126 | 3.5830 ± 0.0899  | -0.0089          |                   |
| 2048 | 1019.6438 | 5.9625 ± 0.2969 | -1.2607 ± 0.2750 | 3.3303 ± 0.2111  | -0.0122          |                  |                   |

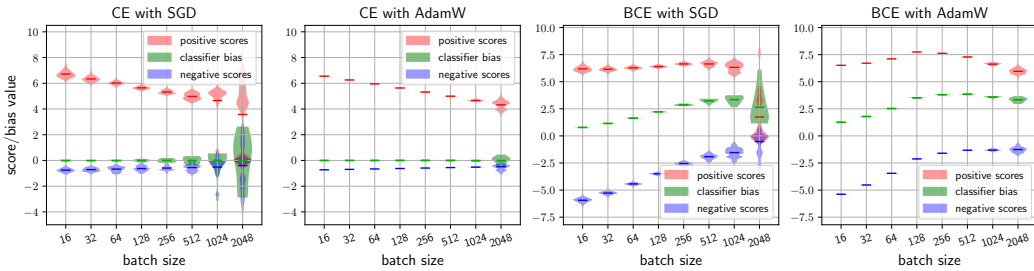

Figure S-8: The distributions of the final classifier bias and positive/negative decision scores for ResNet18 trained on MNIST with different batch sizes, while  $\lambda_W = \lambda_H = \lambda_b = 5 \times 10^{-4}$ .

The decision score results are very different from that in the experiments with fixed batch size. For examples, in the training with CE loss and fixed batch size = 128, the positive and negative decision scores converge to about 5.64 and -0.63, respectively, and the value of  $\hat{\rho} = \|\hat{\mathbf{W}}\|_F^2$  converge to

about 219 and 212 in the training by SGD and AdamW, respectively, as shown in Tables S-8 and S-9. In contrast, these values varies as the batch size in the experiments with varying batch sizes.

In addition, the positive/negative decision scores did not converge to the theoretical values in Eq. (13) in our experiments; we believe it is resulted from the difference between the batch algorithm and the proof of Theorems. We roughly replaced  $n$  with  $\frac{\text{batch size}}{K}$  in computing  $\alpha(\hat{b})$ .

### S-2.3 EXPERIMENTAL RESULTS OF CLASSIFICATION

In the experiments of classification in Sec. 4.2, we train the models for 100 epochs. In each training, the model with best classification accuracy  $\mathcal{A}$  is chosen as the final model, which was used to compute the uniform accuracy  $\mathcal{A}_{\text{Uni}}$  presented in Table 2. In Table S-11 and S-12, we list their numerical results on the training and test dataset of CIFAR10 and CIFAR100. In these experiments, though the classification accuracy  $\mathcal{A}$  of some models on the training datasets have reached 100%, neural collapse has not caused during the training. An obvious evidence is that both positive and negative decision scores have not converged, with large standard deviations, whether on the training set or testing set. The small standard deviations of the final classification bias might be more resulted from their initialization.

From Tables S-11 and S-12, one can find that, the gaps between the means of positive and negative decision scores of BCE-trained models are usually larger than that of CE-trained models, while in some cases, the standard deviations of the positive/negative decision scores of BCE-trained models are higher than that of CE-trained models. However, without any modification, the standard deviations and the gap between the positive and negative means cannot be precisely used to evaluate the intra-class compactness and inter-class distinctiveness. The decision score is calculated by the norm of the classifier vector and the feature vector, with the angle between them. The diverse  $\hat{\rho}$  of CE-trained and BCE-trained models indicates different norms of the classifier vectors.

In Fig. 4, the all features are first projected into 2-dimension space from  $d$ -dimension space, and  $d = 1024$  for ResNet50, which are then translated and scaled into the region of  $[0, 1] \times [0, 1]$ . We finally plot these feature points on the 2D plane.

Table S-11: The numerical results of ResNet18, ResNet50, DenseNet121 trained on CIFAR10 for classification.

| $\mathcal{M}$ | Op.   | DA    | Loss             | classifier       |                  | on training data |                  |                 |                            | on testing data  |                  |
|---------------|-------|-------|------------------|------------------|------------------|------------------|------------------|-----------------|----------------------------|------------------|------------------|
|               |       |       |                  | $\hat{\rho}$     | $\hat{b}$        | $s_{\text{pos}}$ | $s_{\text{neg}}$ | $\mathcal{A}$   | $\mathcal{A}_{\text{Uni}}$ | $s_{\text{pos}}$ | $s_{\text{neg}}$ |
| ResNet18      | SGD   | 1     | CE               | 34.86            | $-0.01 \pm 0.03$ | $14.9 \pm 3.54$  | $-1.68 \pm 2.64$ | 99.98           | 97.55                      | $13.9 \pm 4.73$  | $-1.56 \pm 2.89$ |
|               |       |       | BCE              | 52.33            | $2.89 \pm 0.03$  | $12.9 \pm 2.75$  | $-9.70 \pm 2.67$ | 100.00          | 99.99                      | $11.3 \pm 4.93$  | $-9.25 \pm 3.30$ |
|               | 1&2   | CE    | 12.59            | $-0.01 \pm 0.02$ | $3.23 \pm 0.38$  | $-0.37 \pm 0.62$ | 98.02            | 95.99           | $3.09 \pm 0.61$            | $-0.35 \pm 0.70$ |                  |
|               |       | BCE   | 19.66            | $2.84 \pm 0.02$  | $3.86 \pm 0.45$  | $-0.86 \pm 0.66$ | 98.71            | 98.01           | $3.66 \pm 0.80$            | $-0.84 \pm 0.77$ |                  |
|               | AdamW | 1     | CE               | 85.52            | $-0.00 \pm 0.01$ | $12.3 \pm 3.60$  | $-12.4 \pm 4.12$ | 99.99           | 99.57                      | $10.9 \pm 5.52$  | $-12.1 \pm 4.58$ |
|               |       |       | BCE              | 113.9            | $2.16 \pm 0.02$  | $16.3 \pm 2.95$  | $-20.0 \pm 4.50$ | 100.00          | 100.00                     | $14.2 \pm 6.37$  | $-19.0 \pm 5.75$ |
| 1&2           | CE    | 36.26 | $-0.01 \pm 0.01$ | $2.54 \pm 0.18$  | $-1.13 \pm 0.38$ | 99.96            | 99.88            | $2.41 \pm 0.52$ | $-1.12 \pm 0.50$           |                  |                  |
|               | BCE   | 44.16 | $2.14 \pm 0.01$  | $3.57 \pm 0.20$  | $-1.74 \pm 0.38$ | 99.96            | 99.94            | $3.34 \pm 0.81$ | $-1.72 \pm 0.56$           |                  |                  |
| ResNet50      | SGD   | 1     | CE               | 18.74            | $0.00 \pm 0.03$  | $17.4 \pm 3.16$  | $-2.00 \pm 3.30$ | 99.99           | 98.09                      | $16.1 \pm 4.56$  | $-1.86 \pm 3.73$ |
|               |       |       | BCE              | 29.07            | $2.83 \pm 0.04$  | $13.7 \pm 2.33$  | $-12.4 \pm 3.07$ | 99.99           | 99.98                      | $11.9 \pm 5.08$  | $-11.8 \pm 3.83$ |
|               | 1&2   | CE    | 8.18             | $0.00 \pm 0.04$  | $3.28 \pm 0.35$  | $-0.39 \pm 0.56$ | 98.25            | 96.65           | $3.14 \pm 0.63$            | $-0.37 \pm 0.66$ |                  |
|               |       | BCE   | 13.86            | $2.65 \pm 0.03$  | $3.68 \pm 0.45$  | $-1.08 \pm 0.61$ | 98.79            | 98.24           | $3.47 \pm 0.85$            | $-1.06 \pm 0.75$ |                  |
|               | AdamW | 1     | CE               | 143.9            | $0.01 \pm 0.02$  | $16.7 \pm 5.64$  | $-18.6 \pm 6.76$ | 100.00          | 98.95                      | $14.9 \pm 7.87$  | $-18.2 \pm 7.23$ |
|               |       |       | BCE              | 153.4            | $2.20 \pm 0.01$  | $21.9 \pm 6.82$  | $-28.5 \pm 9.09$ | 99.97           | 99.96                      | $19.4 \pm 10.1$  | $-27.2 \pm 10.4$ |
| 1&2           | CE    | 79.80 | $0.00 \pm 0.01$  | $2.44 \pm 0.25$  | $-1.16 \pm 0.33$ | 99.96            | 99.89            | $2.28 \pm 0.57$ | $-1.16 \pm 0.44$           |                  |                  |
|               | BCE   | 102.6 | $2.14 \pm 0.00$  | $3.35 \pm 0.24$  | $-1.58 \pm 0.44$ | 99.95            | 99.94            | $3.16 \pm 0.72$ | $-1.55 \pm 0.56$           |                  |                  |
| DenseNet121   | SGD   | 1     | CE               | 48.02            | $0.00 \pm 0.02$  | $10.5 \pm 2.37$  | $-1.16 \pm 2.18$ | 99.30           | 93.29                      | $9.57 \pm 3.41$  | $-1.06 \pm 2.41$ |
|               |       |       | BCE              | 64.94            | $2.93 \pm 0.03$  | $9.06 \pm 1.76$  | $-6.05 \pm 1.74$ | 99.45           | 99.24                      | $7.75 \pm 3.63$  | $-5.71 \pm 2.32$ |
|               | 1&2   | CE    | 14.99            | $0.00 \pm 0.02$  | $2.89 \pm 0.67$  | $-0.32 \pm 0.67$ | 91.20            | 86.80           | $2.77 \pm 0.80$            | $-0.30 \pm 0.71$ |                  |
|               |       | BCE   | 19.60            | $2.86 \pm 0.02$  | $3.69 \pm 0.88$  | $-0.65 \pm 0.73$ | 92.38            | 90.28           | $3.52 \pm 1.08$            | $-0.62 \pm 0.80$ |                  |
|               | AdamW | 1     | CE               | 139.4            | $0.00 \pm 0.01$  | $10.2 \pm 3.06$  | $-10.6 \pm 4.44$ | 99.97           | 98.48                      | $8.70 \pm 5.00$  | $-10.4 \pm 4.86$ |
|               |       |       | BCE              | 156.6            | $2.17 \pm 0.01$  | $13.1 \pm 2.78$  | $-15.1 \pm 4.22$ | 99.97           | 99.97                      | $10.9 \pm 5.93$  | $-14.4 \pm 5.13$ |
| 1&2           | CE    | 39.93 | $0.00 \pm 0.01$  | $2.31 \pm 0.28$  | $-1.28 \pm 0.48$ | 98.83            | 98.10            | $2.14 \pm 0.64$ | $-1.26 \pm 0.58$           |                  |                  |
|               | BCE   | 40.53 | $2.18 \pm 0.01$  | $3.40 \pm 0.42$  | $-1.65 \pm 0.52$ | 98.81            | 98.51            | $3.13 \pm 0.94$ | $-1.60 \pm 0.67$           |                  |                  |



1296  
1297  
1298  
1299  
1300  
1301  
1302  
1303  
1304  
1305  
1306  
1307  
1308  
1309  
1310  
1311  
1312  
1313  
1314  
1315  
1316  
1317  
1318  
1319  
1320  
1321  
1322  
1323  
1324  
1325  
1326  
1327  
1328  
1329  
1330  
1331  
1332  
1333  
1334  
1335  
1336  
1337  
1338  
1339  
1340  
1341  
1342  
1343  
1344  
1345  
1346  
1347  
1348  
1349

Table S-12: The numerical results of ResNet18, ResNet50, DenseNet121 trained on CIFAR100 for classification.

| $\mathcal{M}$ | Opt.  | DA  | Loss | classifier   |                  | on training data |                  |               |                            | on testing data  |                  |
|---------------|-------|-----|------|--------------|------------------|------------------|------------------|---------------|----------------------------|------------------|------------------|
|               |       |     |      | $\hat{\rho}$ | $\hat{b}$        | $s_{\text{pos}}$ | $s_{\text{neg}}$ | $\mathcal{A}$ | $\mathcal{A}_{\text{Uni}}$ | $s_{\text{pos}}$ | $s_{\text{neg}}$ |
| ResNet18      | SGD   | 1   | CE   | 317.6        | $0.00 \pm 0.02$  | $15.8 \pm 3.15$  | $-0.18 \pm 3.04$ | 99.79         | 76.32                      | $13.0 \pm 5.06$  | $-0.15 \pm 3.06$ |
|               |       |     | BCE  | 408.8        | $2.89 \pm 0.02$  | $9.39 \pm 2.87$  | $-10.0 \pm 2.94$ | 99.94         | 99.69                      | $5.28 \pm 5.95$  | $-9.64 \pm 3.06$ |
|               |       | 1&2 | CE   | 138.8        | $0.00 \pm 0.02$  | $5.82 \pm 1.33$  | $-0.07 \pm 0.98$ | 88.26         | 73.67                      | $5.09 \pm 1.67$  | $-0.06 \pm 1.00$ |
|               | AdamW | 1   | CE   | 1007.        | $0.00 \pm 0.02$  | $12.5 \pm 4.18$  | $-13.4 \pm 5.16$ | 99.98         | 92.02                      | $7.47 \pm 7.81$  | $-13.1 \pm 5.19$ |
|               |       |     | BCE  | 1372.        | $2.14 \pm 0.02$  | $15.3 \pm 4.85$  | $-21.2 \pm 6.34$ | 99.98         | 99.97                      | $7.05 \pm 10.2$  | $-19.7 \pm 6.47$ |
|               |       | 1&2 | CE   | 476.9        | $0.00 \pm 0.02$  | $4.49 \pm 0.82$  | $-2.04 \pm 0.99$ | 99.25         | 95.86                      | $3.15 \pm 1.77$  | $-2.14 \pm 1.09$ |
|               |       |     | BCE  | 576.1        | $2.18 \pm 0.02$  | $3.67 \pm 0.80$  | $-4.13 \pm 0.84$ | 99.18         | 98.25                      | $2.22 \pm 1.84$  | $-4.01 \pm 0.96$ |
| ResNet50      | SGD   | 1   | CE   | 258.8        | $0.00 \pm 0.01$  | $17.7 \pm 3.12$  | $-0.19 \pm 3.56$ | 99.90         | 79.70                      | $14.5 \pm 5.17$  | $-0.16 \pm 3.58$ |
|               |       |     | BCE  | 328.3        | $2.87 \pm 0.01$  | $10.0 \pm 2.82$  | $-11.6 \pm 3.40$ | 99.86         | 99.62                      | $5.37 \pm 6.20$  | $-10.9 \pm 3.46$ |
|               |       | 1&2 | CE   | 102.7        | $0.00 \pm 0.01$  | $5.97 \pm 1.41$  | $-0.07 \pm 1.07$ | 87.46         | 72.45                      | $5.29 \pm 1.71$  | $-0.06 \pm 1.05$ |
|               | AdamW | 1   | CE   | 2157.        | $0.00 \pm 0.01$  | $13.9 \pm 5.49$  | $-19.4 \pm 7.18$ | 99.98         | 87.42                      | $8.29 \pm 9.45$  | $-19.2 \pm 7.20$ |
|               |       |     | BCE  | 2863.        | $2.15 \pm 0.02$  | $17.6 \pm 4.92$  | $-25.7 \pm 7.34$ | 99.98         | 99.97                      | $8.49 \pm 11.2$  | $-23.5 \pm 7.67$ |
|               |       | 1&2 | CE   | 1334.        | $0.00 \pm 0.02$  | $4.42 \pm 0.67$  | $-1.96 \pm 0.87$ | 99.69         | 97.86                      | $3.06 \pm 1.90$  | $-2.25 \pm 1.07$ |
|               |       |     | BCE  | 1440.        | $2.18 \pm 0.02$  | $3.81 \pm 0.82$  | $-4.27 \pm 0.80$ | 99.67         | 99.22                      | $2.28 \pm 1.96$  | $-4.21 \pm 0.93$ |
| DenseNet121   | SGD   | 1   | CE   | 337.9        | $-0.00 \pm 0.02$ | $12.9 \pm 3.33$  | $-0.12 \pm 2.83$ | 92.46         | 56.75                      | $10.5 \pm 4.75$  | $-0.10 \pm 2.82$ |
|               |       |     | BCE  | 383.8        | $2.95 \pm 0.02$  | $6.03 \pm 2.64$  | $-7.83 \pm 2.81$ | 92.85         | 87.12                      | $3.36 \pm 4.28$  | $-7.34 \pm 2.91$ |
|               |       | 1&2 | CE   | 143.2        | $-0.00 \pm 0.02$ | $4.62 \pm 1.67$  | $-0.04 \pm 1.01$ | 67.23         | 47.68                      | $4.26 \pm 1.84$  | $-0.04 \pm 1.01$ |
|               | AdamW | 1   | BCE  | 161.5        | $2.90 \pm 0.01$  | $2.14 \pm 1.68$  | $-2.95 \pm 1.04$ | 68.15         | 56.43                      | $1.74 \pm 1.85$  | $-2.93 \pm 1.05$ |
|               |       |     | CE   | 1090.        | $-0.00 \pm 0.01$ | $9.39 \pm 3.69$  | $-12.3 \pm 4.98$ | 99.89         | 83.67                      | $4.74 \pm 6.83$  | $-12.1 \pm 4.99$ |
|               |       | 1&2 | BCE  | 1146.        | $2.17 \pm 0.01$  | $9.78 \pm 2.72$  | $-16.0 \pm 4.77$ | 99.86         | 99.55                      | $3.66 \pm 7.20$  | $-14.6 \pm 5.03$ |
|               |       |     | CE   | 430.2        | $-0.00 \pm 0.01$ | $3.82 \pm 1.13$  | $-2.00 \pm 1.00$ | 91.18         | 80.57                      | $2.85 \pm 1.83$  | $-2.07 \pm 1.06$ |
|               |       |     | BCE  | 474.5        | $2.20 \pm 0.01$  | $2.70 \pm 1.16$  | $-3.85 \pm 0.89$ | 90.66         | 85.83                      | $1.79 \pm 1.83$  | $-3.82 \pm 0.97$ |

## S-3 PROOF OF THEOREM 2

Zhou et al. (2022) have proved that the loss satisfying contrastive property can cause neural collapse. CE loss, focal loss, and label smoothing loss satisfy this property, while BCE does not, and we proof that BCE can also result in the neural collapse in this paper.

**Definition S-1** (Contrastive property (Zhou et al., 2022)). A loss function  $\mathcal{L}(z)$  satisfies the contrastive property if there exists a function  $\phi$  such that  $\mathcal{L}(z)$  can be lower bounded by

$$\mathcal{L}(z) \geq \phi\left(\sum_{\substack{j=1 \\ j \neq k}}^K (z_j - z_k)\right) \quad (57)$$

where the equality holds only when  $z_j = z_\ell$  for  $\forall j, \ell \neq k$ , and the function  $\phi(x)$  satisfies

$$x^* = \arg \min_x \phi(x) + c|x| \quad (58)$$

is unique for  $\forall c > 0$ , and  $x^* \leq 0$ . ■

**Theorem S-3** (Zhou et al., 2022) Assume that the feature dimension  $d$  is larger than the category number  $K$ , i.e.,  $d \geq K - 1$ , and  $\mathcal{L}$  is satisfying the contrastive property. Then any global minimizer  $(\mathbf{W}^*, \mathbf{H}^*, \mathbf{b}^*)$  of  $f(\mathbf{W}, \mathbf{H}, \mathbf{b})$  defined using  $\mathcal{L}$  with Eq. (3) obeys the following properties,

$$\|\mathbf{w}^*\| = \|\mathbf{w}_1^*\| = \|\mathbf{w}_2^*\| = \dots = \|\mathbf{w}_K^*\|, \quad (59)$$

$$\mathbf{h}_i^{(k)*} = \sqrt{\frac{\lambda_{\mathbf{W}}}{n\lambda_{\mathbf{H}}}} \mathbf{w}_k^*, \quad \forall k \in [K], i \in [n], \quad (60)$$

$$\tilde{\mathbf{h}}_i^* := \frac{1}{K} \sum_{j=1}^K \mathbf{h}_i^{(j)*} = \mathbf{0}, \quad \forall i \in [n], \quad (61)$$

$$\mathbf{b}^* = b^* \mathbf{1}_K, \quad (62)$$

where either  $b^* = 0$  or  $\lambda_{\mathbf{b}} = 0$ . The matrix  $\mathbf{W}^{*T}$  forms a  $K$ -simplex ETF in the sense that

$$\frac{1}{\|\mathbf{w}^*\|_2^2} \mathbf{W}^{*T} \mathbf{W}^* = \frac{K}{K-1} \left( \mathbf{I}_K - \frac{1}{K} \mathbf{1}_K \mathbf{1}_K^T \right), \quad (63)$$

where  $\mathbf{I}_K \in \mathbb{R}^{K \times K}$  denotes the identity matrix,  $\mathbf{1}_K \in \mathbb{R}^K$  denotes the all ones vector. ■

**Theorem S-4** Assume that the feature dimension  $d$  is larger than the number of classes  $K$ , i.e.,  $d \geq K - 1$ . Then any global minimizer  $(\mathbf{W}^*, \mathbf{H}^*, \mathbf{b}^*)$  of

$$\min_{\mathbf{W}, \mathbf{H}, \mathbf{b}} f_{\text{bce}}(\mathbf{W}, \mathbf{H}, \mathbf{b}) := g_{\text{bce}}(\mathbf{W}\mathbf{H} - \mathbf{b}\mathbf{1}^T) + \frac{\lambda_{\mathbf{W}}}{2} \|\mathbf{W}\|_F^2 + \frac{\lambda_{\mathbf{H}}}{2} \|\mathbf{H}\|_F^2 + \frac{\lambda_{\mathbf{b}}}{2} \|\mathbf{b}\|_2^2 \quad (64)$$

with

$$g_{\text{bce}}(\mathbf{W}\mathbf{H} - \mathbf{b}\mathbf{1}^T) := \frac{1}{N} \sum_{k=1}^K \sum_{i=1}^n \mathcal{L}_{\text{bce}}(\mathbf{W}\mathbf{h}_i^{(k)} - \mathbf{b}, \mathbf{y}_k), \quad (65)$$

obeys the following

$$\|\mathbf{w}^*\| = \|\mathbf{w}_1^*\| = \|\mathbf{w}_2^*\| = \dots = \|\mathbf{w}_K^*\|, \quad \text{and} \quad \mathbf{b}^* = b^* \mathbf{1}, \quad (66)$$

$$\mathbf{h}_i^{(k)*} = \sqrt{\frac{\lambda_{\mathbf{W}}}{n\lambda_{\mathbf{H}}}} \mathbf{w}_k^*, \quad \forall k \in [K], i \in [n], \quad \text{and} \quad \tilde{\mathbf{h}}_i^* := \frac{1}{K} \sum_{j=1}^K \mathbf{h}_i^{(j)*} = \mathbf{0}, \quad \forall i \in [n], \quad (67)$$

and the matrix  $\frac{1}{\|\mathbf{w}^*\|_2} \mathbf{W}^{*T}$  forms a  $K$ -simplex ETF in the sense that

$$\frac{1}{\|\mathbf{w}^*\|_2^2} \mathbf{W}^{*T} \mathbf{W}^* = \frac{K}{K-1} \left( \mathbf{I}_K - \frac{1}{K} \mathbf{1}_K \mathbf{1}_K^T \right), \quad (68)$$

where  $b^*$  is the solution of equation

$$\lambda_{\mathbf{b}} b = \frac{K-1}{K \left( 1 + \exp \left( b + \sqrt{\frac{\lambda_{\mathbf{W}}}{n\lambda_{\mathbf{H}}} \frac{\rho}{K(K-1)}} \right) \right)} - \frac{1}{K \left( 1 + \exp \left( \sqrt{\frac{\lambda_{\mathbf{W}}}{n\lambda_{\mathbf{H}}} \frac{\rho}{K}} - b \right) \right)}. \quad (69)$$

**Proof** According to Lemma 1, any critical point  $(\mathbf{W}, \mathbf{H}, \mathbf{b})$  of  $f(\mathbf{W}, \mathbf{H}, \mathbf{b})$  satisfies

$$\mathbf{W}^T \mathbf{W} = \frac{\lambda_{\mathbf{H}}}{\lambda_{\mathbf{W}}} \mathbf{H}^T \mathbf{H}. \quad (70)$$

Let  $\rho = \|\mathbf{W}\|_F^2$  for any critical point  $(\mathbf{W}, \mathbf{H}, \mathbf{b})$ . Then, according to Lemma 3, for any  $c_1, c_2 \geq 0$ ,

$$\begin{aligned} & f_{\text{bce}}(\mathbf{W}, \mathbf{H}, \mathbf{b}) \\ & \geq \left[ \lambda_{\mathbf{W}} - \left( \frac{2K-1}{N(1+c_2)} - \frac{1}{N(1+c_1)} \right) \sqrt{\frac{n\lambda_{\mathbf{W}}}{\lambda_{\mathbf{H}}}} \right] \rho - \frac{1}{2K\lambda_{\mathbf{b}}} \left( \frac{K-1}{1+c_2} - \frac{1}{1+c_1} \right)^2 + C \end{aligned} \quad (71)$$

where

$$C = \frac{c_1}{1+c_1} \log \left( \frac{1+c_1}{c_1} \right) + \frac{\log(1+c_1)}{1+c_1} + \frac{K-1}{1+c_2} \left[ c_2 \log \left( \frac{1+c_2}{c_2} \right) + \log(1+c_2) \right]. \quad (72)$$

According to Lemma 4, the inequality (71) achieves its equality when

$$\|\mathbf{w}_1\| = \|\mathbf{w}_2\| = \dots = \|\mathbf{w}_K\|, \text{ and } \mathbf{b} = b^* \mathbf{1}, \quad (73)$$

$$\mathbf{h}_i^{(k)} = \sqrt{\frac{\lambda_{\mathbf{W}}}{n\lambda_{\mathbf{H}}}} \mathbf{w}_k, \forall k \in [K], i \in [n], \text{ and } \tilde{\mathbf{h}}_i = \frac{1}{K} \sum_{k=1}^K \mathbf{h}_i^{(k)} = \mathbf{0}, \forall i \in [n], \quad (74)$$

$$\mathbf{W}\mathbf{W}^T = \frac{\rho}{K-1} \left( \mathbf{I}_K - \frac{1}{K} \mathbf{1}_K \mathbf{1}_K^T \right), \quad (75)$$

$$c_1 = \exp \left( \sqrt{\frac{\lambda_{\mathbf{W}}}{n\lambda_{\mathbf{H}}} \frac{\rho}{K}} - b^* \right), \text{ and } c_2 = \exp \left( b^* + \sqrt{\frac{\lambda_{\mathbf{W}}}{n\lambda_{\mathbf{H}}} \frac{\rho}{K(K-1)}} \right), \quad (76)$$

where  $b^*$  is the solution of equation

$$\lambda_{\mathbf{b}} b = \frac{K-1}{K \left( 1 + \exp \left( b + \sqrt{\frac{\lambda_{\mathbf{W}}}{n\lambda_{\mathbf{H}}} \frac{\rho}{K(K-1)}} \right) \right)} - \frac{1}{K \left( 1 + \exp \left( \sqrt{\frac{\lambda_{\mathbf{W}}}{n\lambda_{\mathbf{H}}} \frac{\rho}{K}} - b \right) \right)}. \quad (77)$$

According to Lemma 5, the equation (77) in terms of  $b$  has only one solution  $b^*$ .

Given  $\lambda_{\mathbf{W}}, \lambda_{\mathbf{H}}, \lambda_{\mathbf{b}} > 0$ ,  $f_{\text{bce}}(\mathbf{W}, \mathbf{H}, \mathbf{b})$  is convex function, which achieves its minimum with finite  $\mathbf{W}, \mathbf{H}, \mathbf{b}$ . Therefore, the right side of inequality (71) is a consistent when  $\lambda_{\mathbf{W}}, \lambda_{\mathbf{H}}, \lambda_{\mathbf{b}}$  are fixed and Eqs. (73, 74, 75, 76) hold, which finishes the proof. ■

**Lemma 1** Any critical point  $(\mathbf{W}, \mathbf{H}, \mathbf{b})$  of Eq. (64) obeys

$$\mathbf{W}^T \mathbf{W} = \frac{\lambda_{\mathbf{H}}}{\lambda_{\mathbf{W}}} \mathbf{H} \mathbf{H}^T, \text{ and } \|\mathbf{W}\|_F^2 = \frac{\lambda_{\mathbf{H}}}{\lambda_{\mathbf{W}}} \|\mathbf{H}\|_F^2. \quad (78)$$

**Proof** See Lemma D.2 in reference (Zhu et al., 2021). ■

**Lemma 2** For any  $\mathbf{h}_i^{(k)}$  with  $c_1, c_2 > 0$ , the BCE loss is lower bounded by

$$\mathcal{L}_{\text{bce}}(\mathbf{W}\mathbf{h}_i^{(k)}, \mathbf{y}_k) \geq \frac{1}{1+c_1} \left( -\mathbf{w}_k^T \mathbf{h}_i^{(k)} + b_k \right) + \frac{1}{1+c_2} \sum_{\substack{j=1 \\ j \neq k}}^K \left( \mathbf{w}_j^T \mathbf{h}_i^{(k)} - b_j \right) + C, \quad (79)$$

where

$$C = \frac{c_1}{1+c_1} \log \left( \frac{1+c_1}{c_1} \right) + \frac{\log(1+c_1)}{1+c_1} + \frac{K-1}{1+c_2} \left[ c_2 \log \left( \frac{1+c_2}{c_2} \right) + \log(1+c_2) \right]. \quad (80)$$

1458 *The inequality becomes an equality when*

$$1459 \mathbf{w}_j^T \mathbf{h}_i^{(k)} - b_j = \mathbf{w}_\ell^T \mathbf{h}_i^{(k)} - b_\ell, \quad \forall j, \ell \neq k, \quad (81)$$

1461 *and*

$$1462 c_1 = \exp\left(\mathbf{w}_k^T \mathbf{h}_i^{(k)} - b_k\right), \quad (82)$$

$$1464 c_2 = \exp\left(b_j - \mathbf{w}_j^T \mathbf{h}_i^{(k)}\right), \quad j \neq k. \quad (83)$$

1466 **Proof** *By the concavity of the  $\log(1 + e^x)$ , we have,*

$$1468 \sum_{k=1}^K \log(1 + \exp(x_k)) \geq K \log\left(1 + \exp\left(\frac{\sum_{k=1}^K x_k}{K}\right)\right), \quad \forall x_k \in \mathbb{R}. \quad (84)$$

1471 *Then,*

$$1472 \mathcal{L}_{\text{bce}}(\mathbf{W}\mathbf{h}_i^{(k)} + \mathbf{b}, \mathbf{y}_k) \quad (85)$$

$$1474 = \log(1 + \exp(-\mathbf{w}_k^T \mathbf{h}_i^{(k)} + b_k)) + \sum_{\substack{j=1 \\ j \neq k}}^K \log(1 + \exp(\mathbf{w}_j^T \mathbf{h}_i^{(k)} - b_j)) \quad (86)$$

$$1477 \geq \log(1 + \exp(-\mathbf{w}_k^T \mathbf{h}_i^{(k)} + b_k)) + (K-1) \log\left[1 + \exp\left(\frac{\sum_{\substack{j=1 \\ j \neq k}}^K (\mathbf{w}_j^T \mathbf{h}_i^{(k)} - b_j)}{K-1}\right)\right] \quad (87)$$

$$1480 = \log\left(\frac{c_1}{1+c_1} \frac{1+c_1}{c_1} + \frac{1+c_1}{1+c_1} \exp\left(-\mathbf{w}_k^T \mathbf{h}_i^{(k)} + b_k\right)\right) \\ 1481 + (K-1) \log\left[\frac{c_2}{1+c_2} \frac{1+c_2}{c_2} + \frac{1+c_2}{1+c_2} \exp\left(\frac{\sum_{\substack{j=1 \\ j \neq k}}^K (\mathbf{w}_j^T \mathbf{h}_i^{(k)} - b_j)}{K-1}\right)\right] \quad (88)$$

$$1485 \geq \frac{c_1}{1+c_1} \log\left(\frac{1+c_1}{c_1}\right) + \frac{1}{1+c_1} \log\left((1+c_1) \exp\left(-\mathbf{w}_k^T \mathbf{h}_i^{(k)} + b_k\right)\right) \\ 1487 + (K-1) \left\{ \frac{c_2}{1+c_2} \log\left(\frac{1+c_2}{c_2}\right) + \frac{1}{1+c_2} \log\left[(1+c_2) \exp\left(\frac{\sum_{\substack{j=1 \\ j \neq k}}^K (\mathbf{w}_j^T \mathbf{h}_i^{(k)} - b_j)}{K-1}\right)\right] \right\} \quad (89)$$

$$1491 = \frac{1}{1+c_1} \left(-\mathbf{w}_k^T \mathbf{h}_i^{(k)} + b_k\right) + \frac{1}{1+c_2} \sum_{\substack{j=1 \\ j \neq k}}^K (\mathbf{w}_j^T \mathbf{h}_i^{(k)} - b_j) \\ 1492 + \underbrace{\frac{c_1}{1+c_1} \log\left(\frac{1+c_1}{c_1}\right) + \frac{\log(1+c_1)}{1+c_1} + \frac{K-1}{1+c_2} \left[ c_2 \log\left(\frac{1+c_2}{c_2}\right) + \log(1+c_2) \right]}_C. \quad (90)$$

1499 *The first inequality is derived from the concavity of  $\log(1 + e^x)$ , i.e., Eq. (84), which achieves the equality if and only if*

$$1501 \mathbf{w}_j^T \mathbf{h}_i^{(k)} - b_j = \mathbf{w}_\ell^T \mathbf{h}_i^{(k)} - b_\ell, \quad \forall j, \ell \neq k \in [K]. \quad (91)$$

1503 *The second inequality is derived from the concavity of  $\log(x)$ ,*

$$1504 \log(tx_1 + (1-t)x_2) \geq t \log(x_1) + (1-t) \log(x_2), \quad \forall x_1, x_2 \in \mathbb{R} \text{ and } t \in [0, 1], \quad (92)$$

1505 *which achieves its equality if and only if  $x_1 = x_2$ , or  $t = 0$ , or  $t = 1$ . Then, the second inequality holds for any  $c_1, c_2 \geq 0$ , and it becomes an equality if and only if*

$$1508 \frac{1+c_1}{c_1} = (1+c_1) \exp\left(-\mathbf{w}_k^T \mathbf{h}_i^{(k)} + b_k\right) \text{ or } c_1 = 0 \text{ or } c_1 = +\infty, \text{ and} \quad (93)$$

$$1510 \frac{1+c_2}{c_2} = (1+c_2) \exp\left(\frac{\sum_{\substack{j=1 \\ j \neq k}}^K (\mathbf{w}_j^T \mathbf{h}_i^{(k)} - b_j)}{K-1}\right) \text{ or } c_1 = 0 \text{ or } c_1 = +\infty. \quad (94)$$

1512 *It is trivial when  $c_1 = 0$  or  $c_1 = +\infty$  or  $c_2 = 0$  or  $c_2 = +\infty$ . Then, we get*

$$1513 \quad c_1 = \exp\left(\mathbf{w}_k^T \mathbf{h}_i^{(k)} - b_k\right), \quad (95)$$

$$1514 \quad c_2 = \exp\left(\frac{\sum_{\substack{j=1 \\ j \neq k}}^K (b_j - \mathbf{w}_j^T \mathbf{h}_i^{(k)})}{K-1}\right) \stackrel{(91)}{=} \exp\left(b_j - \mathbf{w}_j^T \mathbf{h}_i^{(k)}\right), \quad j \neq k, \quad (96)$$

1515 *which are desired.* ■

1516 **Lemma 3** *Let*

$$1517 \quad \mathbf{W} = [\mathbf{w}_1, \mathbf{w}_2, \dots, \mathbf{w}_K]^T \in \mathbb{R}^{K \times d}, \quad (97)$$

$$1518 \quad \mathbf{H} = [h_1^{(1)}, \dots, h_n^{(1)}, \dots, h_1^{(K)}, \dots, h_n^{(K)}] \in \mathbb{R}^{d \times N} \quad (98)$$

1519 *with  $N = nK$ . Then, for any critical point  $(\mathbf{W}, \mathbf{H}, \mathbf{b})$  of Eq. (64) and any  $c_1, c_2 \geq 0$ , we have*

$$1520 \quad f_{\text{bce}}(\mathbf{W}, \mathbf{H}, \mathbf{b})$$

$$1521 \quad \geq \left[ \lambda \mathbf{w} - \left( \frac{1}{N(1+c_2)} + \frac{1}{N(1+c_1)} \right) \sqrt{\frac{n\lambda \mathbf{w}}{\lambda \mathbf{H}}} \right] \rho - \frac{1}{2K\lambda \mathbf{b}} \left( \frac{K-1}{1+c_2} - \frac{1}{1+c_1} \right)^2 + C \quad (99)$$

1522 *with  $C = \frac{c_1}{1+c_1} \log\left(\frac{1+c_1}{c_1}\right) + \frac{\log(1+c_1)}{1+c_1} + \frac{K-1}{1+c_2} [c_2 \log\left(\frac{1+c_2}{c_2}\right) + \log(1+c_2)]$ .*

1523 **Proof** *According to Lemma 1, Eq. (79) holds for any  $c_1, c_2 > 0$  and any  $\mathbf{h}_i^{(k)}$  with  $k \in [K]$ ,  $i \in [n]$ . We take the same  $c_1$  and  $c_2$  for all  $\mathbf{h}_i^{(k)}$ , then*

$$1524 \quad (1+c_1)(1+c_2) [g_{\text{bce}}(\mathbf{W}\mathbf{H} + \mathbf{b}\mathbf{1}^T) - C] \quad (100)$$

$$1525 \quad = (1+c_1)(1+c_2) \left[ \frac{1}{N} \sum_{k=1}^K \sum_{i=1}^n \mathcal{L}_{\text{bce}}(\mathbf{W}\mathbf{h}_i^{(k)} + \mathbf{b}, \mathbf{y}_k) - C \right] \quad (101)$$

$$1526 \quad \geq \frac{1}{N} \sum_{k=1}^K \sum_{i=1}^n \left[ (1+c_2) \left( -\mathbf{w}_k^T \mathbf{h}_i^{(k)} + b_k \right) + (1+c_1) \sum_{\substack{j=1 \\ j \neq k}}^K \left( \mathbf{w}_j^T \mathbf{h}_i^{(k)} - b_j \right) \right] \quad (102)$$

$$1527 \quad = \frac{1+c_1}{N} \sum_{k=1}^K \sum_{i=1}^n \sum_{\substack{j=1 \\ j \neq k}}^K \left( \mathbf{w}_j^T \mathbf{h}_i^{(k)} - b_j \right) - \frac{1+c_2}{N} \sum_{k=1}^K \sum_{i=1}^n \left( \mathbf{w}_k^T \mathbf{h}_i^{(k)} - b_k \right) \quad (103)$$

$$1528 \quad = \frac{1+c_1}{N} \sum_{k=1}^K \sum_{i=1}^n \left( \sum_{j=1}^K \left( \mathbf{w}_j^T \mathbf{h}_i^{(k)} - b_j \right) - \mathbf{w}_k^T \mathbf{h}_i^{(k)} + b_k \right) - \frac{1+c_2}{N} \sum_{k=1}^K \sum_{i=1}^n \left( \mathbf{w}_k^T \mathbf{h}_i^{(k)} - b_k \right) \quad (104)$$

$$1529 \quad = \frac{1+c_1}{N} \sum_{k=1}^K \sum_{i=1}^n \sum_{j=1}^K \left( \mathbf{w}_j^T \mathbf{h}_i^{(k)} - b_j - \mathbf{w}_k^T \mathbf{h}_i^{(k)} + b_k \right) + \frac{1+c_1}{N} \sum_{k=1}^K \sum_{i=1}^n \sum_{\substack{j=1 \\ j \neq k}}^K \left( \mathbf{w}_k^T \mathbf{h}_i^{(k)} - b_k \right)$$

$$1530 \quad - \frac{1+c_2}{N} \sum_{k=1}^K \sum_{i=1}^n \left( \mathbf{w}_k^T \mathbf{h}_i^{(k)} - b_k \right) \quad (105)$$

$$1531 \quad = \frac{1+c_1}{N} \left[ \sum_{k=1}^K \sum_{i=1}^n \sum_{j=1}^K \left( \mathbf{w}_j^T \mathbf{h}_i^{(k)} - b_j \right) - \sum_{k=1}^K \sum_{i=1}^n \sum_{j=1}^K \left( \mathbf{w}_k^T \mathbf{h}_i^{(k)} - b_k \right) \right]$$

$$1532 \quad + \left( \frac{1+c_1}{N} (K-1) - \frac{1+c_2}{N} \right) \sum_{k=1}^K \sum_{i=1}^n \mathbf{w}_k^T \mathbf{h}_i^{(k)} - \left( \frac{1+c_1}{N} (K-1) - \frac{1+c_2}{N} \right) \sum_{k=1}^K \sum_{i=1}^n b_k \quad (106)$$

$$1533 \quad = \frac{1+c_1}{N} \sum_{i=1}^n \left[ \sum_{k=1}^K \left( \sum_{j=1}^K \mathbf{w}_k^T \mathbf{h}_i^{(j)} - K \mathbf{w}_k^T \mathbf{h}_i^{(k)} \right) - \underbrace{\sum_{k=1}^K \sum_{j=1}^K b_j + \sum_{k=1}^K \sum_{j=1}^K b_k}_0 \right]$$

$$\begin{aligned}
& + \left( \frac{1+c_1}{N}(K-1) - \frac{1+c_2}{N} \right) \sum_{k=1}^K \sum_{i=1}^n \mathbf{w}_k^T \mathbf{h}_i^{(k)} - \left( \frac{1+c_1}{K}(K-1) - \frac{1+c_2}{K} \right) \sum_{k=1}^K b_k \\
& \tag{107}
\end{aligned}$$

$$\begin{aligned}
& = \frac{1+c_1}{n} \sum_{i=1}^n \sum_{k=1}^K \mathbf{w}_k^T (\tilde{\mathbf{h}}_i - \mathbf{h}_i^{(k)}) + \left( \frac{1+c_1}{N}(K-1) - \frac{1+c_2}{N} \right) \sum_{k=1}^K \sum_{i=1}^n \mathbf{w}_k^T \mathbf{h}_i^{(k)} \\
& - \left( \frac{1+c_1}{K}(K-1) - \frac{1+c_2}{K} \right) \sum_{k=1}^K b_k \\
& \tag{108}
\end{aligned}$$

where  $\tilde{\mathbf{h}}_i = \frac{1}{K} \sum_{k=1}^K \mathbf{h}_i^{(k)}$ .

According to the AM-GM inequality, we have

$$\mathbf{u}^T \mathbf{v} \geq -\frac{c}{2} \|\mathbf{u}\|_2^2 - \frac{1}{2c} \|\mathbf{v}\|_2^2, \forall \mathbf{u}, \mathbf{v} \in \mathbb{R}^d, \forall c \geq 0. \tag{109}$$

Then,

$$\begin{aligned}
& (1+c_1)(1+c_2)[g_{\text{bcc}}(\mathbf{W}\mathbf{H} + \mathbf{b}\mathbf{1}^T) - C] \\
& \geq -\frac{1+c_1}{n} \left( \frac{c_3}{2} \sum_{i=1}^n \sum_{k=1}^K \|\mathbf{w}_k\|_2^2 + \frac{1}{2c_3} \sum_{i=1}^n \sum_{k=1}^K \|\tilde{\mathbf{h}}_i - \mathbf{h}_i^{(k)}\|_2^2 \right) \\
& - \left( \frac{1+c_1}{N}(K-1) - \frac{1+c_2}{N} \right) \left( \frac{c_4}{2} \sum_{k=1}^K \sum_{i=1}^n \|\mathbf{w}_k\|_2^2 + \frac{1}{2c_4} \sum_{k=1}^K \sum_{i=1}^n \|\mathbf{h}_i^{(k)}\|_2^2 \right) \\
& - \left( \frac{1+c_1}{K}(K-1) - \frac{1+c_2}{K} \right) \sum_{k=1}^K b_k \\
& \tag{110}
\end{aligned}$$

$$\begin{aligned}
& = -\frac{1+c_1}{n} \left[ \frac{c_3}{2} \sum_{i=1}^n \sum_{k=1}^K \|\mathbf{w}_k\|_2^2 + \frac{1}{2c_3} \sum_{i=1}^n \left( \sum_{k=1}^K \|\mathbf{h}_i^{(k)}\|_2^2 - K \|\tilde{\mathbf{h}}_i\|_2^2 \right) \right] \\
& - \left( \frac{1+c_1}{N}(K-1) - \frac{1+c_2}{N} \right) \left( \frac{c_4}{2} \sum_{k=1}^K \sum_{i=1}^n \|\mathbf{w}_k\|_2^2 + \frac{1}{2c_4} \sum_{k=1}^K \sum_{i=1}^n \|\mathbf{h}_i^{(k)}\|_2^2 \right) \\
& - \left( \frac{1+c_1}{K}(K-1) - \frac{1+c_2}{K} \right) \sum_{k=1}^K b_k \\
& \tag{111}
\end{aligned}$$

$$\begin{aligned}
& = -\frac{1+c_1}{n} \left( \frac{c_3}{2} \sum_{i=1}^n \sum_{k=1}^K \|\mathbf{w}_k\|_2^2 + \frac{1}{2c_3} \sum_{i=1}^n \sum_{k=1}^K \|\mathbf{h}_i^{(k)}\|_2^2 \right) \\
& - \left( \frac{1+c_1}{N}(K-1) - \frac{1+c_2}{N} \right) \left( \frac{c_4}{2} \sum_{k=1}^K \sum_{i=1}^n \|\mathbf{w}_k\|_2^2 + \frac{1}{2c_4} \sum_{k=1}^K \sum_{i=1}^n \|\mathbf{h}_i^{(k)}\|_2^2 \right) \\
& - \left( \frac{1+c_1}{K}(K-1) - \frac{1+c_2}{K} \right) \sum_{k=1}^K b_k + \frac{1+c_1}{2nc_3} \sum_{i=1}^n K \|\tilde{\mathbf{h}}_i\|_2^2 \\
& \tag{112}
\end{aligned}$$

$$\begin{aligned}
& = -\frac{1+c_1}{n} \left( \frac{nc_3}{2} \|\mathbf{W}\|_F^2 + \frac{1}{2c_3} \|\mathbf{H}\|_F^2 \right) \\
& - \left( \frac{1+c_1}{N}(K-1) - \frac{1+c_2}{N} \right) \left( \frac{nc_4}{2} \|\mathbf{W}\|_F^2 + \frac{1}{2c_4} \|\mathbf{H}\|_F^2 \right) \\
& - \left( \frac{1+c_1}{K}(K-1) - \frac{1+c_2}{K} \right) \sum_{k=1}^K b_k + \frac{1+c_1}{2nc_3} \sum_{i=1}^n K \|\tilde{\mathbf{h}}_i\|_2^2 \\
& \tag{113}
\end{aligned}$$

1620 and the inequality becomes an equality if and only if

$$1621 \quad c_3 \mathbf{w}_k = \mathbf{h}_i^{(k)} - \tilde{\mathbf{h}}_i, \quad \forall k \in [K], i \in [n], \text{ and} \quad (114)$$

$$1622 \quad c_4 \mathbf{w}_k = -\mathbf{h}_i^{(k)}, \quad \forall k \in [K], i \in [n], \quad (115)$$

1623 which can be achieved only when  $\tilde{\mathbf{h}}_i = \mathbf{0}$ .

1624 Let  $\rho = \|\mathbf{W}\|_F^2$ . Then, by using Lemma 1, we have  $\|\mathbf{H}\|_F^2 = \frac{\lambda_{\mathbf{W}}}{\lambda_{\mathbf{H}}} \rho$ , and

$$1625 \quad f_{\text{bcc}}(\mathbf{W}, \mathbf{H}, \mathbf{b})$$

$$1626 \quad = g_{\text{bcc}}(\mathbf{W}\mathbf{H} + \mathbf{b}\mathbf{1}^T) + \frac{\lambda_{\mathbf{W}}}{2} \|\mathbf{W}\|_F^2 + \frac{\lambda_{\mathbf{H}}}{2} \|\mathbf{H}\|_F^2 + \frac{\lambda_{\mathbf{b}}}{2} \|\mathbf{b}\|_2^2 \quad (116)$$

$$1627 \quad \geq -\frac{1}{n(1+c_2)} \left( \frac{nc_3}{2} \|\mathbf{W}\|_F^2 + \frac{1}{2c_3} \|\mathbf{H}\|_F^2 \right)$$

$$1628 \quad - \left( \frac{K-1}{N(1+c_2)} - \frac{1}{N(1+c_1)} \right) \left( \frac{nc_4}{2} \|\mathbf{W}\|_F^2 + \frac{1}{2c_4} \|\mathbf{H}\|_F^2 \right)$$

$$1629 \quad - \left( \frac{K-1}{K(1+c_2)} - \frac{1}{K(1+c_1)} \right) \sum_{k=1}^K b_k + \frac{1}{2nc_3(1+c_2)} \sum_{i=1}^n K \|\tilde{\mathbf{h}}_i\|_2^2 + C$$

$$1630 \quad + \frac{\lambda_{\mathbf{W}}}{2} \rho + \frac{\lambda_{\mathbf{H}}}{2} \frac{\lambda_{\mathbf{W}}}{\lambda_{\mathbf{H}}} \rho + \frac{\lambda_{\mathbf{b}}}{2} \|\mathbf{b}\|_2^2 \quad (117)$$

$$1631 \quad = -\frac{1}{n(1+c_2)} \left( \frac{nc_3}{2} \rho + \frac{1}{2c_3} \frac{\lambda_{\mathbf{W}}}{\lambda_{\mathbf{H}}} \rho \right) - \left( \frac{K-1}{N(1+c_2)} - \frac{1}{N(1+c_1)} \right) \left( \frac{nc_4}{2} \rho + \frac{1}{2c_4} \frac{\lambda_{\mathbf{W}}}{\lambda_{\mathbf{H}}} \rho \right)$$

$$1632 \quad - \left( \frac{K-1}{K(1+c_2)} - \frac{1}{K(1+c_1)} \right) \sum_{k=1}^K b_k + \frac{1}{2nc_3(1+c_2)} \sum_{i=1}^n K \|\tilde{\mathbf{h}}_i\|_2^2 + C + \lambda_{\mathbf{W}} \rho + \frac{\lambda_{\mathbf{b}}}{2} \|\mathbf{b}\|_2^2$$

$$1633 \quad (118)$$

$$1634 \quad = \left[ \lambda_{\mathbf{W}} - \frac{1}{n(1+c_2)} \left( \frac{nc_3}{2} + \frac{1}{2c_3} \frac{\lambda_{\mathbf{W}}}{\lambda_{\mathbf{H}}} \right) - \left( \frac{K-1}{N(1+c_2)} - \frac{1}{N(1+c_1)} \right) \left( \frac{nc_4}{2} + \frac{1}{2c_4} \frac{\lambda_{\mathbf{W}}}{\lambda_{\mathbf{H}}} \right) \right] \rho$$

$$1635 \quad + \frac{\lambda_{\mathbf{b}}}{2} \|\mathbf{b}\|_2^2 - \left( \frac{K-1}{K(1+c_2)} - \frac{1}{K(1+c_1)} \right) \sum_{k=1}^K b_k + \frac{1}{2nc_3(1+c_2)} \sum_{i=1}^n K \|\tilde{\mathbf{h}}_i\|_2^2 + C \quad (119)$$

$$1636 \quad = \left[ \lambda_{\mathbf{W}} - \frac{1}{n(1+c_2)} \left( \frac{nc_3}{2} + \frac{1}{2c_3} \frac{\lambda_{\mathbf{W}}}{\lambda_{\mathbf{H}}} \right) - \left( \frac{K-1}{N(1+c_2)} - \frac{1}{N(1+c_1)} \right) \left( \frac{nc_4}{2} + \frac{1}{2c_4} \frac{\lambda_{\mathbf{W}}}{\lambda_{\mathbf{H}}} \right) \right] \rho$$

$$1637 \quad + \frac{\lambda_{\mathbf{b}}}{2} \sum_{k=1}^K \left[ b_k - \frac{1}{\lambda_{\mathbf{b}}} \left( \frac{K-1}{K(1+c_2)} - \frac{1}{K(1+c_1)} \right) \right]^2 - \frac{1}{2\lambda_{\mathbf{b}}} \sum_{k=1}^K \left( \frac{K-1}{K(1+c_2)} - \frac{1}{K(1+c_1)} \right)^2$$

$$1638 \quad + \frac{1}{2nc_3(1+c_2)} \sum_{i=1}^n K \|\tilde{\mathbf{h}}_i\|_2^2 + C \quad (120)$$

$$1639 \quad \geq \left[ \lambda_{\mathbf{W}} - \frac{1}{n(1+c_2)} \left( \frac{nc_3}{2} + \frac{1}{2c_3} \frac{\lambda_{\mathbf{W}}}{\lambda_{\mathbf{H}}} \right) - \left( \frac{K-1}{N(1+c_2)} - \frac{1}{N(1+c_1)} \right) \left( \frac{nc_4}{2} + \frac{1}{2c_4} \frac{\lambda_{\mathbf{W}}}{\lambda_{\mathbf{H}}} \right) \right] \rho$$

$$1640 \quad + \frac{\lambda_{\mathbf{b}}}{2} \sum_{k=1}^K \left[ b_k - \frac{1}{\lambda_{\mathbf{b}}} \left( \frac{K-1}{K(1+c_2)} - \frac{1}{K(1+c_1)} \right) \right]^2 - \frac{1}{2K\lambda_{\mathbf{b}}} \left( \frac{K-1}{1+c_2} - \frac{1}{1+c_1} \right)^2 + C$$

$$1641 \quad (121)$$

$$1642 \quad \geq \left[ \lambda_{\mathbf{W}} - \frac{1}{n(1+c_2)} \left( \frac{nc_3}{2} + \frac{1}{2c_3} \frac{\lambda_{\mathbf{W}}}{\lambda_{\mathbf{H}}} \right) - \left( \frac{K-1}{N(1+c_2)} - \frac{1}{N(1+c_1)} \right) \left( \frac{nc_4}{2} + \frac{1}{2c_4} \frac{\lambda_{\mathbf{W}}}{\lambda_{\mathbf{H}}} \right) \right] \rho$$

$$1643 \quad - \frac{1}{2K\lambda_{\mathbf{b}}} \left( \frac{K-1}{1+c_2} - \frac{1}{1+c_1} \right)^2 + C, \quad (122)$$

1644 where the inequality (121) achieves its equality if and only if

$$1645 \quad \tilde{\mathbf{h}}_i = \mathbf{0}, \quad \forall i \in [n], \quad (123)$$

1674 and the inequality (122) becomes an equality whenever either

$$1675 \lambda_{\mathbf{b}} = 0 \text{ or } b_k = \frac{1}{\lambda_{\mathbf{b}}} \left( \frac{K-1}{K(1+c_2)} - \frac{1}{K(1+c_1)} \right), \forall k \in [K]. \quad (124)$$

1676 Due to  $\lambda_{\mathbf{b}} > 0$  and  $c_1, c_2$  are same for any  $k \in [K]$ , therefore

$$1677 b_k = b_j, \forall k, j \in [K]. \quad (125)$$

1681 Based on Eqs. (114) and (123), we have

$$1682 c_3 \mathbf{w}_k = \mathbf{h}_i^{(k)} \Rightarrow c_3^2 = \frac{\sum_{i=1}^n \sum_{k=1}^K \|\mathbf{h}_i^{(k)}\|_2^2}{\sum_{i=1}^n \sum_{k=1}^K \|\mathbf{w}_k\|_2^2} = \frac{\|\mathbf{H}\|_F^2}{n\|\mathbf{W}\|_F^2} = \frac{\lambda_{\mathbf{W}}}{n\lambda_{\mathbf{H}}} \Rightarrow c_3 = \sqrt{\frac{\lambda_{\mathbf{W}}}{n\lambda_{\mathbf{H}}}}; \quad (126)$$

1683 similarly, from Eq. (115), we get

$$1684 c_4 \mathbf{w}_k = -\mathbf{h}_i^{(k)} \Rightarrow c_4^2 = \frac{\sum_{i=1}^n \sum_{k=1}^K \|\mathbf{h}_i^{(k)}\|_2^2}{\sum_{i=1}^n \sum_{k=1}^K \|\mathbf{w}_k\|_2^2} = \frac{\|\mathbf{H}\|_F^2}{n\|\mathbf{W}\|_F^2} = \frac{\lambda_{\mathbf{W}}}{n\lambda_{\mathbf{H}}} \Rightarrow c_4 = -\sqrt{\frac{\lambda_{\mathbf{W}}}{n\lambda_{\mathbf{H}}}}. \quad (127)$$

1685 Plugging them into Eq. (119), we get

$$1686 f_{\text{bce}}(\mathbf{W}, \mathbf{H}, \mathbf{b})$$

$$1687 \geq \left[ \lambda_{\mathbf{W}} - \frac{1}{n(1+c_2)} \left( \frac{nc_3}{2} + \frac{1}{2c_3} \frac{\lambda_{\mathbf{W}}}{\lambda_{\mathbf{H}}} \right) - \left( \frac{K-1}{N(1+c_2)} - \frac{1}{N(1+c_1)} \right) \left( \frac{nc_4}{2} + \frac{1}{2c_4} \frac{\lambda_{\mathbf{W}}}{\lambda_{\mathbf{H}}} \right) \right] \rho$$

$$1688 - \frac{1}{2K\lambda_{\mathbf{b}}} \left( \frac{K-1}{1+c_2} - \frac{1}{1+c_1} \right)^2 + C \quad (128)$$

$$1689 = \left[ \lambda_{\mathbf{W}} - \left( \frac{1}{n(1+c_2)} - \frac{K-1}{N(1+c_2)} + \frac{1}{N(1+c_1)} \right) \left( \frac{n}{2} \sqrt{\frac{\lambda_{\mathbf{W}}}{n\lambda_{\mathbf{H}}}} + \frac{1}{2} \sqrt{\frac{n\lambda_{\mathbf{H}}}{\lambda_{\mathbf{W}}} \frac{\lambda_{\mathbf{W}}}{\lambda_{\mathbf{H}}}} \right) \right] \rho$$

$$1690 - \frac{1}{2K\lambda_{\mathbf{b}}} \left( \frac{K-1}{1+c_2} - \frac{1}{1+c_1} \right)^2 + C \quad (129)$$

$$1691 = \left[ \lambda_{\mathbf{W}} - \left( \frac{1}{n(1+c_2)} - \frac{K-1}{N(1+c_2)} + \frac{1}{N(1+c_1)} \right) \sqrt{\frac{n\lambda_{\mathbf{W}}}{\lambda_{\mathbf{H}}}} \right] \rho$$

$$1692 - \frac{1}{2K\lambda_{\mathbf{b}}} \left( \frac{K-1}{1+c_2} - \frac{1}{1+c_1} \right)^2 + C \quad (130)$$

$$1693 = \left[ \lambda_{\mathbf{W}} - \left( \frac{1}{N(1+c_2)} + \frac{1}{N(1+c_1)} \right) \sqrt{\frac{n\lambda_{\mathbf{W}}}{\lambda_{\mathbf{H}}}} \right] \rho - \frac{1}{2K\lambda_{\mathbf{b}}} \left( \frac{K-1}{1+c_2} - \frac{1}{1+c_1} \right)^2 + C \quad (131)$$

1694 which is desired.  $\blacksquare$

1700 **Lemma 4** Under the same assumptions of Lemma 3, the lower bound in Eq. (99) is achieved for any critical point  $(\mathbf{W}, \mathbf{H}, \mathbf{b})$  of Eq. (64) if and only if the following hold

$$1701 \|\mathbf{w}_1\| = \|\mathbf{w}_2\| = \dots = \|\mathbf{w}_K\|, \text{ and } \mathbf{b} = b^* \mathbf{1}, \quad (132)$$

$$1702 \mathbf{h}_i^{(k)} = \sqrt{\frac{\lambda_{\mathbf{W}}}{n\lambda_{\mathbf{H}}}} \mathbf{w}_k, \forall k \in [K], i \in [n], \text{ and } \tilde{\mathbf{h}}_i = \frac{1}{K} \sum_{k=1}^K \mathbf{h}_i^{(k)} = \mathbf{0}, \forall i \in [n], \quad (133)$$

$$1703 \mathbf{W}\mathbf{W}^T = \frac{\rho}{K-1} \left( \mathbf{I}_K - \frac{1}{K} \mathbf{1}_K \mathbf{1}_K^T \right), \quad (134)$$

$$1704 c_1 = \exp \left( \sqrt{\frac{\lambda_{\mathbf{W}}}{n\lambda_{\mathbf{H}}}} \frac{\rho}{K} - b^* \right), \text{ and } c_2 = \exp \left( b^* + \sqrt{\frac{\lambda_{\mathbf{W}}}{n\lambda_{\mathbf{H}}}} \frac{\rho}{K(K-1)} \right), \quad (135)$$

1705 where  $b^*$  is the solution of equation

$$1706 \lambda_{\mathbf{b}} b = \left[ \frac{K-1}{K \left( 1 + \exp \left( b + \sqrt{\frac{\lambda_{\mathbf{W}}}{n\lambda_{\mathbf{H}}}} \frac{\rho}{K(K-1)} \right) \right)} - \frac{1}{K \left( 1 + \exp \left( \sqrt{\frac{\lambda_{\mathbf{W}}}{n\lambda_{\mathbf{H}}}} \frac{\rho}{K} - b \right) \right)} \right]. \quad (136)$$



**Proof** With the proof of Lemma 3, to achieve the lower bound, it needs at least Eqs. (114), (115), and (123) to hold, i.e.,

$$\tilde{\mathbf{h}}_i = \frac{1}{K} \sum_{k=1}^K \mathbf{h}_i^{(k)} = \mathbf{0}, \quad \forall i \in [n], \quad \text{and} \quad \sqrt{\frac{\lambda \mathbf{W}}{n \lambda_{\mathbf{H}}}} \mathbf{w}_k = \mathbf{h}_i^{(k)}, \quad \forall k \in [K], i \in [n], \quad (137)$$

and further implies

$$\sum_{k=1}^K \mathbf{w}_k = \sqrt{\frac{n \lambda_{\mathbf{H}}}{\lambda \mathbf{W}}} \sum_{k=1}^K \mathbf{h}_i^{(k)} = \mathbf{0}. \quad (138)$$

Then,

$$c_1 = \exp(\mathbf{w}_k^T \mathbf{h}_i^{(k)} - b_k) = \exp\left(\sqrt{\frac{\lambda \mathbf{W}}{n \lambda_{\mathbf{H}}}} \|\mathbf{w}_k\|_2^2 - b_k\right), \quad \forall k \in [K], \quad (139)$$

$$c_2 = \exp(b_j - \mathbf{w}_j^T \mathbf{h}_i^{(k)}) = \exp\left(b_j - \sqrt{\frac{\lambda \mathbf{W}}{n \lambda_{\mathbf{H}}}} \mathbf{w}_k^T \mathbf{w}_j\right), \quad \forall j \neq k \in [K], \quad (140)$$

Since that  $c_1, c_2$  are chosen to be the same for any  $j \neq k \in [K]$ , therefore,

$$\sqrt{\frac{\lambda \mathbf{W}}{n \lambda_{\mathbf{H}}}} \|\mathbf{w}_k\|_2^2 - b_k = \sqrt{\frac{\lambda \mathbf{W}}{n \lambda_{\mathbf{H}}}} \|\mathbf{w}_j\|_2^2 - b_j, \quad \forall k, j \in [K], \quad (141)$$

$$\sqrt{\frac{\lambda \mathbf{W}}{n \lambda_{\mathbf{H}}}} \mathbf{w}_k^T \mathbf{w}_j - b_j = \sqrt{\frac{\lambda \mathbf{W}}{n \lambda_{\mathbf{H}}}} \mathbf{w}_k^T \mathbf{w}_\ell - b_\ell, \quad \forall j \neq \ell \in [K], \forall k \in [K], \quad (142)$$

With the proof of Lemma 2, to achieve the lower bound, it needs at least Eqs. (91) to hold, then,

$$\begin{aligned} & \sqrt{\frac{\lambda \mathbf{W}}{n \lambda_{\mathbf{H}}}} \|\mathbf{w}_k\|_2^2 - b_k \\ \stackrel{(138)}{=} & -\sqrt{\frac{\lambda \mathbf{W}}{n \lambda_{\mathbf{H}}}} \sum_{\substack{j=1 \\ j \neq k}}^K \mathbf{w}_j^T \mathbf{w}_k - b_k \end{aligned} \quad (143)$$

$$\stackrel{(142)}{=} -\sqrt{\frac{\lambda \mathbf{W}}{n \lambda_{\mathbf{H}}}} \sum_{\substack{\ell=1 \\ \ell \neq k}}^K \mathbf{w}_k^T \mathbf{w}_\ell - b_k + \sum_{\substack{j=1 \\ j \neq k}}^K (b_\ell - b_j) \quad (144)$$

$$= -(K-1) \sqrt{\frac{\lambda \mathbf{W}}{n \lambda_{\mathbf{H}}}} \underbrace{\mathbf{w}_k^T \mathbf{w}_\ell}_{\ell \neq k} - 2b_k + (K-1)b_\ell - K\bar{b} \quad (145)$$

$$\stackrel{(141,142)}{\implies} -2b_k + (K-1)b_\ell - K\bar{b} = -2b_\ell + (K-1)b_j - K\bar{b} \quad (146)$$

$$\iff b_k = b_\ell, \quad \forall \ell \neq k \in [K], \quad (147)$$

which is conforming to Eq. (125) when  $\lambda_b > 0$ . Then, combining with Eqs. (141) and (138),

$$\|\mathbf{w}_k\|_2^2 = \|\mathbf{w}_j\|_2^2 = \frac{\|\mathbf{W}\|_F^2}{K} = \frac{\rho}{K}, \quad \forall k, j \in [K], \quad (148)$$

$$\|\mathbf{w}_k\|_2^2 = -(K-1) \sum_{\substack{j=1 \\ j \neq k}}^K \mathbf{w}_k^T \mathbf{w}_j \Rightarrow \mathbf{w}_k^T \mathbf{w}_j = -\frac{1}{K-1} \frac{\rho}{K}, \quad \forall j \neq k \in [K]. \quad (149)$$

Therefore,

$$\mathbf{W} \mathbf{W}^T = \frac{\rho}{K-1} \left( \mathbf{I}_K - \frac{1}{K} \mathbf{1}_K \mathbf{1}_K^T \right). \quad (150)$$

Plugging (148) and (149) into (139) and (140)

$$c_1 = \exp\left(\sqrt{\frac{\lambda \mathbf{W}}{n \lambda_{\mathbf{H}}}} \frac{\rho}{K} - b\right), \quad (151)$$

$$c_2 = \exp\left(b + \sqrt{\frac{\lambda \mathbf{W}}{n \lambda_{\mathbf{H}}}} \frac{\rho}{K(K-1)}\right), \quad (152)$$

where  $b = b_k = b_j$ . When  $\lambda_b > 0$ , substitute Eqs. (151) and (152) into (124), we have

$$b = \frac{1}{\lambda_b} \left( \frac{K-1}{K(1+c_2)} - \frac{1}{K(1+c_1)} \right) \quad (153)$$

$$= \frac{1}{\lambda_b} \left[ \frac{K-1}{K \left( 1 + \exp \left( b + \sqrt{\frac{\lambda_W}{n\lambda_H}} \frac{\rho}{K(K-1)} \right) \right)} - \frac{1}{K \left( 1 + \exp \left( \sqrt{\frac{\lambda_W}{n\lambda_H}} \frac{\rho}{K} - b \right) \right)} \right]. \quad (154)$$

When  $\lambda_b = 0$ , substitute Eq. (137) into

$$\frac{\partial f_{\text{bce}}}{\partial b_k} = \frac{1}{nK} \left( n - \sum_{j=1}^K \sum_{i=1}^n \frac{1}{1 + e^{-w_k h_i^{(j)} + b_k}} \right) = 0, \quad \forall k \in [K], \quad (155)$$

we have

$$0 = \frac{K-1}{K \left( 1 + \exp \left( b + \sqrt{\frac{\lambda_W}{n\lambda_H}} \frac{\rho}{K(K-1)} \right) \right)} - \frac{1}{K \left( 1 + \exp \left( \sqrt{\frac{\lambda_W}{n\lambda_H}} \frac{\rho}{K} - b \right) \right)}, \quad (156)$$

by combining with Eqs. (148) and (149). ■

**Lemma 5** The equation

$$\lambda_b b = \frac{K-1}{K \left( 1 + \exp \left( b + \sqrt{\frac{\lambda_W}{n\lambda_H}} \frac{\rho}{K(K-1)} \right) \right)} - \frac{1}{K \left( 1 + \exp \left( \sqrt{\frac{\lambda_W}{n\lambda_H}} \frac{\rho}{K} - b \right) \right)} \quad (157)$$

has only one solution.

**Proof** A number  $b^*$  is a solution of equation (157) if and only if it is a solution of

$$\overbrace{\lambda_b K b + \frac{1}{1 + \exp \left( \sqrt{\frac{\lambda_W}{n\lambda_H}} \frac{\rho}{K} - b \right)}}^{\beta_1(b)} = \overbrace{\frac{K-1}{1 + \exp \left( b + \sqrt{\frac{\lambda_W}{n\lambda_H}} \frac{\rho}{K(K-1)} \right)}}^{\beta_2(b)}. \quad (158)$$

When  $\lambda_b > 0$ ,

$$\beta_1(b) \rightarrow -\infty, \quad \beta_2(b) \rightarrow K-1 \quad \text{as } b \rightarrow -\infty \quad (159)$$

$$\beta_1(b) \rightarrow +\infty, \quad \beta_2(b) \rightarrow 0 \quad \text{as } b \rightarrow +\infty, \quad (160)$$

and if  $\lambda_b = 0$ ,

$$\beta_1(b) = 0, \quad \beta_2(b) \rightarrow K-1 \quad \text{as } b \rightarrow -\infty \quad (161)$$

$$\beta_1(b) \rightarrow +\infty, \quad \beta_2(b) \rightarrow 0 \quad \text{as } b \rightarrow +\infty. \quad (162)$$

Therefore, the curves of  $\beta_1(b)$  and  $\beta_2(b)$  must intersect at least once in the plane, i.e., the equations (157) and (158) have solutions.

In addition,

$$\frac{d\beta_1(b)}{db} = \lambda_b K + \frac{\exp \left( \sqrt{\frac{\lambda_W}{n\lambda_H}} \frac{\rho}{K} - b \right)}{\left( 1 + \exp \left( \sqrt{\frac{\lambda_W}{n\lambda_H}} \frac{\rho}{K} - b \right) \right)^2} > 0, \quad (163)$$

$$\frac{d\beta_2(b)}{db} = -\frac{(K-1) \exp \left( b + \sqrt{\frac{\lambda_W}{n\lambda_H}} \frac{\rho}{K(K-1)} \right)}{\left( 1 + \exp \left( b + \sqrt{\frac{\lambda_W}{n\lambda_H}} \frac{\rho}{K(K-1)} \right) \right)^2} < 0, \quad (164)$$

i.e.,  $\beta_1(b)$  is strictly increasing, while  $\beta_2(b)$  is strictly decreasing. Therefore, they can intersect at only one point. ■

1836 **Lemma 6** When the class number  $K > 2$  and

$$1837 \lambda_{\mathbf{b}} \sqrt{\frac{\lambda_{\mathbf{W}}}{n\lambda_{\mathbf{H}}} \frac{\rho}{K-1}} + \frac{1}{2(K-1)} > \frac{1}{1 + \exp\left(\sqrt{\frac{\lambda_{\mathbf{W}}}{n\lambda_{\mathbf{H}}} \frac{\rho}{K-1}}\right)}, \quad (165)$$

1839 the final critical bias  $b^*$  could uniformly separate the all positive decision scores

$$1840 \left\{ \mathbf{w}_k^{*T} \mathbf{h}_i^{(k)*} : k \in [K], i \in [n] \right\} \quad (166)$$

1841 and the all negative decision scores

$$1842 \left\{ \mathbf{w}_j^{*T} \mathbf{h}_i^{(k)*} : k, j \in [K], i \in [n], k \neq j \right\}, \quad (167)$$

1843 where

$$1844 \mathbf{W}^* = [\mathbf{w}_1^*, \mathbf{w}_2^*, \dots, \mathbf{w}_K^*]^T \quad (168)$$

$$1845 \mathbf{H}^* = [\mathbf{h}_1^{(1)*}, \dots, \mathbf{h}_n^{(1)*}, \dots, \mathbf{h}_1^{(K)*}, \dots, \mathbf{h}_n^{(K)*}] \quad (169)$$

$$1846 \mathbf{b}^* = (b^*, b^*, \dots, b^*)^T = b^* \mathbf{1}_K \quad (170)$$

1847 form the critical point of function  $f(\mathbf{W}, \mathbf{H}, \mathbf{b})$  in Eq. (64).

1848 **Proof** According to Lemma 4, for the critical point  $(\mathbf{W}^*, \mathbf{H}^*, \mathbf{b}^*)$ , we have

$$1849 \mathbf{w}_k^{*T} \mathbf{h}_i^{(k)*} = \sqrt{\frac{\lambda_{\mathbf{W}}}{n\lambda_{\mathbf{H}}} \frac{\rho}{K}}, \quad \forall k \in [K], i \in [n] \quad (171)$$

$$1850 \mathbf{w}_j^{*T} \mathbf{h}_i^{(k)*} = -\sqrt{\frac{\lambda_{\mathbf{W}}}{n\lambda_{\mathbf{H}}} \frac{\rho}{K(K-1)}}, \quad \forall k, j \in [K], i \in [n], k \neq j. \quad (172)$$

1851 Let  $b_{\text{neg}} = -\sqrt{\frac{\lambda_{\mathbf{W}}}{n\lambda_{\mathbf{H}}} \frac{\rho}{K(K-1)}}$ ,  $b_{\text{pos}} = \sqrt{\frac{\lambda_{\mathbf{W}}}{n\lambda_{\mathbf{H}}} \frac{\rho}{K}}$ . Then, the critical  $b^*$  separating the all positive and negative score if and only if

$$1852 b_{\text{neg}} = -\sqrt{\frac{\lambda_{\mathbf{W}}}{n\lambda_{\mathbf{H}}} \frac{\rho}{K(K-1)}} < b^* < \sqrt{\frac{\lambda_{\mathbf{W}}}{n\lambda_{\mathbf{H}}} \frac{\rho}{K}} = b_{\text{pos}} \quad (173)$$

1853 which, according to the proof of Lemma 5, is equivalent to

$$1854 \beta_1(b_{\text{neg}}) < \beta_2(b_{\text{neg}}) \quad \text{and} \quad \beta_1(b_{\text{pos}}) > \beta_2(b_{\text{pos}}). \quad (174)$$

1855 Due to

$$1856 \beta_1(b_{\text{neg}}) < \beta_2(b_{\text{neg}}) \Leftrightarrow -\lambda_{\mathbf{b}} \sqrt{\frac{\lambda_{\mathbf{W}}}{n\lambda_{\mathbf{H}}} \frac{\rho}{K-1}} + \frac{1}{1 + \exp\left(\sqrt{\frac{\lambda_{\mathbf{W}}}{n\lambda_{\mathbf{H}}} \frac{\rho}{K-1}}\right)} < \frac{K-1}{2}$$

$$1857 \Leftrightarrow \frac{1}{1 + e^0} < \frac{K-1}{2} \Leftrightarrow 2 < K \quad (175)$$

$$1858 \beta_1(b_{\text{pos}}) > \beta_2(b_{\text{pos}}) \Leftrightarrow \lambda_{\mathbf{b}} \sqrt{\frac{\lambda_{\mathbf{W}}}{n\lambda_{\mathbf{H}}} \rho} + \frac{1}{2} > \frac{K-1}{1 + \exp\left(\sqrt{\frac{\lambda_{\mathbf{W}}}{n\lambda_{\mathbf{H}}} \frac{\rho}{K-1}}\right)} \quad (176)$$

$$1859 \Leftrightarrow \lambda_{\mathbf{b}} \sqrt{\frac{\lambda_{\mathbf{W}}}{n\lambda_{\mathbf{H}}} \frac{\rho}{K-1}} + \frac{1}{2(K-1)} > \frac{1}{1 + \exp\left(\sqrt{\frac{\lambda_{\mathbf{W}}}{n\lambda_{\mathbf{H}}} \frac{\rho}{K-1}}\right)}, \quad (177)$$

1860 it completes the proof. ■

#### S-4 MORE DISCUSSION ABOUT DECISION SCORES IN THE TRAINING

In the training, the decision scores are updated along the negative direction of their gradients during the back propagation stage, i.e.,

$$\mathbf{w}_k \mathbf{h}^{(k)} \leftarrow \mathbf{w}_k \mathbf{h}^{(k)} - \eta \frac{\partial f_\mu(\mathbf{W}, \mathbf{H}, \mathbf{b})}{\partial (\mathbf{w}_k \mathbf{h}^{(k)})}, \quad \forall k \in [K], \quad (178)$$

$$\mathbf{w}_j \mathbf{h}^{(k)} \leftarrow \mathbf{w}_j \mathbf{h}^{(k)} - \eta \frac{\partial f_\mu(\mathbf{W}, \mathbf{H}, \mathbf{b})}{\partial (\mathbf{w}_j \mathbf{h}^{(k)})}, \quad \forall j \neq k \in [K], \quad (179)$$

where  $\eta$  is the learning rate, and  $\mu \in \{\text{ce}, \text{bce}\}$ .

In the training with CE, the updating formulas are

$$\mathbf{w}_k \mathbf{h}^{(k)} \leftarrow \mathbf{w}_k \mathbf{h}^{(k)} + \eta \left( 1 - \frac{e^{\mathbf{w}_k \mathbf{h}^{(k)} - b_k}}{\sum_\ell e^{\mathbf{w}_\ell \mathbf{h}^{(k)} - b_\ell}} \right), \quad (180)$$

$$\mathbf{w}_j \mathbf{h}^{(k)} \leftarrow \mathbf{w}_j \mathbf{h}^{(k)} - \eta \frac{e^{\mathbf{w}_j \mathbf{h}^{(k)} - b_j}}{\sum_\ell e^{\mathbf{w}_\ell \mathbf{h}^{(k)} - b_\ell}}. \quad (181)$$

Then, for the samples with diverse initial decision scores, it is difficult to update their decision scores to the similar level, if they own the similar predicted probabilities belong to each categories.

In the training with BCE, the updating formulas are

$$\mathbf{w}_k \mathbf{h}^{(k)} \leftarrow \mathbf{w}_k \mathbf{h}^{(k)} + \eta \left( 1 - \frac{1}{1 + e^{-\mathbf{w}_k \mathbf{h}^{(k)} + b_k}} \right), \quad (182)$$

$$\mathbf{w}_j \mathbf{h}^{(k)} \leftarrow \mathbf{w}_j \mathbf{h}^{(k)} - \eta \frac{1}{1 + e^{-\mathbf{w}_j \mathbf{h}^{(k)} + b_j}}. \quad (183)$$

Then, for the sample with small positive decision score  $\mathbf{w}_k \mathbf{h}^{(k)}$ , its predicted probability  $\frac{1}{1 + e^{-\mathbf{w}_k \mathbf{h}^{(k)} + b_k}}$  to its category will be also small, and the score updating amplitude  $\eta \left( 1 - \frac{1}{1 + e^{-\mathbf{w}_k \mathbf{h}^{(k)} + b_k}} \right)$  will be large; in contrary, for the sample with large positive score  $\mathbf{w}_k \mathbf{h}^{(k)}$ , the probability  $\frac{1}{1 + e^{-\mathbf{w}_k \mathbf{h}^{(k)} + b_k}}$  will be also large, and the updating amplitude  $\eta \left( 1 - \frac{1}{1 + e^{-\mathbf{w}_k \mathbf{h}^{(k)} + b_k}} \right)$  will be small. This property helps to update the all positive decision scores to be in uniform high level.

Similarly, for the sample with large negative decision score  $\mathbf{w}_j \mathbf{h}^{(k)}$ , its predicted probability  $\frac{1}{1 + e^{-\mathbf{w}_j \mathbf{h}^{(k)} + b_j}}$  to other category will be also large, so is the score updating amplitude  $\eta \frac{1}{1 + e^{-\mathbf{w}_j \mathbf{h}^{(k)} + b_j}}$ ; in contrary, for the sample with small negative score  $\mathbf{w}_j \mathbf{h}^{(k)}$ , the probability  $\frac{1}{1 + e^{-\mathbf{w}_j \mathbf{h}^{(k)} + b_j}}$  will be small, so is the updating amplitude  $\eta \left( 1 - \frac{1}{1 + e^{-\mathbf{w}_j \mathbf{h}^{(k)} + b_j}} \right)$ . This property helps to update the all negative decision scores to be in uniform low level.
